# Supplementary material for: Local chromatin fiber folding represses transcription and loop extrusion in quiescent cells
Source: eLife. 2021 Nov 4;10:e72062. doi: 10.7554/eLife.72062 (PMC8598167; doi:10.7554/eLife.72062)
Supplement: Figure 2—figure supplement 2—source data 1. [file elife-72062-fig2-figsupp2-data1.xlsx]

## Sheet: Sheet1
Log					Q
Nucleosome	Linker Length (bp)	Acet Chipseq	LH Chipseq		Nucleosome	Linker Length (bp)	Acet Chipseq	LH Chipseq		1= nucleosome has LH bound/ is acetylated
1	114.706	0	0		1	114.706	0	0
2	26.4706	0	0		2	35.2941	0	0
3	35.2941	0	0		3	35.2941	0	0
4	167.647	1	0		4	79.4118	0	0
5	26.4706	1	0		5	35.2941	0	0
6	35.2941	1	0		6	35.2941	0	0
7	35.2941	0	0		7	70.5882	0	0
8	26.4706	0	0		8	26.4706	0	0
9	35.2941	0	0		9	35.2941	0	1
10	26.4706	0	0		10	35.2941	0	0
11	35.2941	0	0		11	26.4706	0	0
12	114.706	1	0		12	114.706	0	0
13	35.2941	1	0		13	26.4706	0	0
14	26.4706	1	0		14	26.4706	0	1
15	26.4706	1	0		15	26.4706	0	1
16	26.4706	0	0		16	26.4706	0	0
17	35.2941	0	0		17	35.2941	0	0
18	26.4706	0	0		18	26.4706	0	1
19	35.2941	0	0		19	26.4706	0	1
20	26.4706	0	0		20	35.2941	0	1
21	52.9412	0	0		21	52.9412	0	1
22	26.4706	0	0		22	26.4706	0	1
23	26.4706	0	0		23	35.2941	0	1
24	167.647	0	0		24	35.2941	0	0
25	26.4706	0	0		25	26.4706	0	0
26	26.4706	0	0		26	26.4706	0	0
27	70.5882	0	0		27	26.4706	0	0
28	26.4706	0	0		28	52.9412	0	1
29	26.4706	0	0		29	26.4706	0	1
30	26.4706	1	0		30	35.2941	0	0
31	35.2941	1	0		31	26.4706	0	0
32	26.4706	1	0		32	26.4706	0	0
33	70.5882	1	0		33	26.4706	0	0
34	26.4706	1	0		34	70.5882	0	0
35	35.2941	1	0		35	26.4706	0	0
36	26.4706	1	0		36	26.4706	0	0
37	35.2941	1	0		37	26.4706	0	0
38	26.4706	1	0		38	35.2941	0	0
39	79.4118	1	0		39	26.4706	0	0
40	26.4706	1	0		40	70.5882	0	0
41	35.2941	1	0		41	35.2941	1	0
42	35.2941	0	0		42	26.4706	0	0
43	167.647	0	0		43	35.2941	0	0
44	26.4706	0	0		44	26.4706	0	0
45	26.4706	1	0		45	35.2941	0	0
46	26.4706	1	0		46	26.4706	0	0
47	35.2941	1	0		47	35.2941	0	0
48	114.706	0	0		48	26.4706	0	0
49	35.2941	0	0		49	26.4706	0	0
50	26.4706	0	0		50	114.706	0	0
51	26.4706	0	1		51	26.4706	0	0
52	35.2941	0	0		52	26.4706	0	0
53	26.4706	0	0		53	52.9412	0	0
54	26.4706	0	0		54	141.176	0	0
55	35.2941	0	0		55	26.4706	0	0
56	79.4118	0	1		56	26.4706	0	0
57	26.4706	0	1		57	26.4706	0	1
58	114.706	0	0		58	26.4706	0	1
59	114.706	0	0		59	26.4706	0	0
60	114.706	0	0		60	26.4706	0	1
61	26.4706	0	0		61	35.2941	0	1
62	35.2941	0	0		62	26.4706	0	1
63	35.2941	0	0		63	26.4706	0	1
64	35.2941	0	0		64	35.2941	0	0
65	167.647	0	0		65	26.4706	0	0
66	114.706	0	0		66	26.4706	0	0
67	79.4118	0	0		67	52.9412	0	0
68	35.2941	0	1		68	167.647	0	0
69	35.2941	0	1		69	26.4706	0	0
70	26.4706	0	1		70	70.5882	0	0
71	26.4706	0	1		71	79.4118	0	0
72	70.5882	0	0		72	35.2941	0	0
73	26.4706	0	0		73	35.2941	0	1
74	26.4706	0	0		74	26.4706	0	1
75	35.2941	1	0		75	26.4706	0	0
76	26.4706	1	0		76	52.9412	0	0
77	26.4706	1	0		77	26.4706	0	0
78	26.4706	1	0		78	26.4706	0	0
79	26.4706	1	0		79	35.2941	0	0
80	26.4706	1	0		80	26.4706	0	0
81	52.9412	0	0		81	26.4706	0	0
82	114.706	0	0		82	26.4706	0	0
83	35.2941	0	0		83	35.2941	0	0
84	26.4706	0	0		84	26.4706	0	0
85	26.4706	0	0		85	26.4706	0	0
86	26.4706	0	0		86	26.4706	0	0
87	35.2941	0	0		87	35.2941	0	0
88	26.4706	0	0		88	114.706	0	0
89	26.4706	0	0		89	35.2941	0	0
90	167.647	0	0		90	26.4706	0	0
91	114.706	0	0		91	35.2941	0	0
92	26.4706	0	0		92	26.4706	0	1
93	70.5882	0	0		93	35.2941	0	0
94	26.4706	0	0		94	114.706	0	0
95	35.2941	0	0		95	167.647	0	0
96	26.4706	0	0		96	52.9412	0	1
97	70.5882	0	0		97	26.4706	0	1
98	26.4706	0	0		98	26.4706	0	0
99	52.9412	0	0		99	26.4706	0	0
100	35.2941	0	0		100	26.4706	0	0
101	26.4706	0	0		101	220.588	0	0
102	52.9412	0	0		102	70.5882	0	0
103	26.4706	0	0		103	26.4706	0	0
104	79.4118	0	0		104	26.4706	0	0
105	26.4706	0	0		105	70.5882	0	0
106	26.4706	0	0		106	26.4706	0	0
107	26.4706	0	0		107	114.706	0	0
108	26.4706	0	0		108	26.4706	0	0
109	70.5882	0	0		109	26.4706	0	0
110	79.4118	0	0		110	114.706	0	0
111	26.4706	0	0		111	70.5882	0	0
112	35.2941	0	0		112	26.4706	0	0
113	26.4706	0	0		113	26.4706	0	0
114	35.2941	0	0		114	26.4706	0	0
115	26.4706	0	0		115	26.4706	0	0
116	35.2941	0	0		116	26.4706	0	0
117	35.2941	0	0		117	26.4706	0	0
118	52.9412	0	0		118	26.4706	0	0
119	52.9412	0	0		119	35.2941	0	0
120	26.4706	0	0		120	35.2941	0	0
121	26.4706	1	0		121	52.9412	0	0
122	26.4706	0	0		122	52.9412	0	0
123	114.706	1	0		123	26.4706	0	0
124	26.4706	1	0		124	26.4706	0	0
125	26.4706	1	0		125	26.4706	0	0
126	35.2941	0	0		126	167.647	0	0
127	35.2941	0	0		127	26.4706	0	0
128	26.4706	0	0		128	26.4706	0	0
129	35.2941	0	0		129	26.4706	0	0
130	26.4706	0	0		130	26.4706	0	0
131	35.2941	0	0		131	26.4706	0	0
134	52.9412	0	0		134	26.4706	0	0
133	273.529	1	0		133	26.4706	0	0
134	26.4706	1	0		134	35.2941	0	1
135	35.2941	1	0		135	52.9412	0	0
136	26.4706	1	0		136	26.4706	0	0
137	114.706	1	0		137	26.4706	0	0
138	26.4706	1	0		138	26.4706	0	0
139	44.1176	1	0		139	26.4706	0	0
140	26.4706	1	0		140	35.2941	0	0
141	35.2941	0	0		141	26.4706	0	0
142	26.4706	0	0		142	114.706	0	0
143	26.4706	0	0		143	26.4706	0	0
144	52.9412	0	0		144	35.2941	0	0
145	26.4706	0	0		145	26.4706	0	1
146	35.2941	0	0		146	35.2941	0	0
147	26.4706	0	0		147	26.4706	0	1
148	35.2941	0	0		148	26.4706	0	1
149	26.4706	0	0		149	26.4706	0	1
150	26.4706	0	0		150	35.2941	0	1
151	52.9412	0	0		151	26.4706	0	0
152	35.2941	0	0		152	35.2941	0	0
153	26.4706	0	0		153	26.4706	0	0
154	35.2941	0	0		154	52.9412	0	0
155	35.2941	0	0		155	26.4706	0	1
156	26.4706	1	0		156	35.2941	0	1
157	26.4706	1	0		157	26.4706	0	1
158	26.4706	1	0		158	26.4706	0	0
159	35.2941	1	0		159	26.4706	0	0
160	114.706	1	0		160	26.4706	0	0
161	26.4706	1	0		161	35.2941	0	0
162	35.2941	1	0		162	26.4706	0	0
163	26.4706	1	0		163	35.2941	1	0
164	26.4706	1	0		164	26.4706	1	0
165	26.4706	0	0		165	114.706	0	0
166	26.4706	0	0		166	35.2941	0	0
167	114.706	0	0		167	26.4706	0	0
168	167.647	0	0		168	26.4706	0	1
169	61.7647	0	0		169	26.4706	0	1
170	70.5882	0	0		170	26.4706	0	0
171	26.4706	0	0		171	35.2941	0	0
172	26.4706	0	0		172	26.4706	0	0
173	26.4706	0	0		173	26.4706	0	0
174	26.4706	0	0		174	114.706	0	0
175	35.2941	0	0		175	114.706	0	0
176	114.706	0	0		176	52.9412	0	0
177	167.647	0	0		177	26.4706	0	1
178	52.9412	0	1		178	35.2941	0	1
179	52.9412	0	1		179	35.2941	0	0
180	52.9412	0	1		180	35.2941	0	0
181	26.4706	0	0		181	26.4706	0	1
182	26.4706	0	0		182	26.4706	0	1
183	26.4706	0	0		183	26.4706	0	1
184	26.4706	0	0		184	26.4706	0	1
185	26.4706	0	0		185	52.9412	0	1
186	26.4706	0	0		186	35.2941	0	1
187	26.4706	0	0		187	26.4706	0	1
188	26.4706	0	0		188	26.4706	0	1
189	26.4706	0	0		189	26.4706	0	1
190	26.4706	0	0		190	52.9412	0	1
191	26.4706	0	0		191	26.4706	0	1
192	273.529	1	0		192	52.9412	0	1
193	35.2941	1	0		193	26.4706	0	1
194	26.4706	1	0		194	70.5882	0	0
195	79.4118	1	0		195	26.4706	0	1
196	35.2941	0	0		196	220.588	0	1
197	35.2941	0	0		197	35.2941	0	1
198	26.4706	0	0		198	26.4706	0	1
199	167.647	0	0		199	52.9412	0	1
200	44.1176	0	1		200	26.4706	0	1
201	70.5882	0	1		201	52.9412	0	1
202	52.9412	0	0		202	26.4706	0	1
203	26.4706	0	0		203	220.588	0	0
204	35.2941	0	0		204	79.4118	0	0
205	52.9412	0	0		205	26.4706	0	0
206	26.4706	0	0		206	70.5882	0	0
207	35.2941	0	0		207	26.4706	0	0
208	26.4706	0	0		208	35.2941	0	0
209	35.2941	0	0		209	26.4706	0	0
210	26.4706	0	0		210	26.4706	0	0
211	26.4706	0	0		211	26.4706	0	0
212	26.4706	0	0		212	26.4706	0	0
213	26.4706	0	0		213	26.4706	0	1
214	26.4706	1	0		214	26.4706	0	1
215	26.4706	1	0		215	26.4706	0	1
216	52.9412	1	0		216	35.2941	0	1
217	114.706	1	0		217	26.4706	0	1
218	26.4706	1	0		218	35.2941	0	1
219	26.4706	1	0		219	26.4706	0	1
220	35.2941	1	0		220	26.4706	0	1
221	26.4706	1	0		221	35.2941	0	0
222	26.4706	0	0		222	26.4706	0	0
					223	26.4706	0	0
					224	26.4706	0	0
					225	26.4706	0	0
					226	35.2941	0	1
					227	26.4706	0	1
					228	26.4706	0	0
