# Supplementary material for: Local chromatin fiber folding represses transcription and loop extrusion in quiescent cells
Source: eLife. 2021 Nov 4;10:e72062. doi: 10.7554/eLife.72062 (PMC8598167; doi:10.7554/eLife.72062)
Supplement: Figure 2—figure supplement 3—source data 1. [file elife-72062-fig2-figsupp3-data1.xlsx]

## Sheet: Sheet1
Log								Q
Nucleosome Clusters	Average Nucleosomes per Cluster	Maximum nucleosomes per cluster	Packing Ratio	Sedimentation Coefficient	Radius of gyration	Volume		Nucleosome Clusters	Average Nucleosomes per Cluster	Maximum nucleosomes per cluster	Packing Ratio	Sedimentation Coefficient	Radius of gyration	Volume
7	31.4286	106	1.72461	204.864	83.1929	1.38511e+06		6	37.8333	83	2.16581	225.414	73.2528	1.19963e+06
7	31.4286	106	1.7255	204.863	83.2656	1.38676e+06		6	37.8333	83	2.16603	225.46	73.2555	1.1934e+06
7	31.4286	106	1.72635	204.857	83.3299	1.37822e+06		7	32.4286	83	2.1672	225.432	73.284	1.19585e+06
7	31.4286	106	1.72608	204.874	83.3187	1.37646e+06		7	32.4286	83	2.16821	225.529	73.229	1.19026e+06
7	31.4286	106	1.72634	204.787	83.312	1.44843e+06		7	32.4286	83	2.16776	225.492	73.2116	1.19713e+06
7	31.4286	106	1.72567	204.669	83.293	1.44774e+06		6	37.8333	83	2.16801	225.629	73.1768	1.19153e+06
7	31.4286	106	1.72613	204.677	83.3223	1.44628e+06		6	37.8333	83	2.16847	225.652	73.1542	1.1927e+06
7	31.4286	106	1.72596	204.735	83.2401	1.45563e+06		6	37.8333	83	2.16816	225.631	73.1524	1.19138e+06
7	31.4286	106	1.726	204.448	83.3823	1.45057e+06		6	37.8333	83	2.1678	225.512	73.1772	1.19327e+06
7	31.4286	106	1.7261	204.544	83.3583	1.46053e+06		6	37.8333	83	2.16789	225.57	73.1882	1.18695e+06
7	31.4286	106	1.72583	204.493	83.3392	1.44866e+06		6	37.8333	83	2.16829	225.504	73.2364	1.19375e+06
7	31.4286	106	1.72575	204.526	83.3578	1.46384e+06		7	32.4286	83	2.16721	225.433	73.2369	1.19448e+06
7	31.4286	106	1.72561	204.464	83.4029	1.46815e+06		7	32.4286	83	2.16758	225.559	73.1706	1.22517e+06
7	31.4286	106	1.72545	204.848	83.246	1.45995e+06		6	37.8333	83	2.16832	225.484	73.201	1.19501e+06
7	31.4286	106	1.72541	204.941	83.2026	1.45276e+06		6	37.8333	83	2.16824	225.632	73.1564	1.22431e+06
7	31.4286	106	1.72534	204.933	83.2067	1.44342e+06		6	37.8333	83	2.16942	225.553	73.1823	1.22759e+06
7	31.4286	106	1.72601	204.837	83.2659	1.46206e+06		6	37.8333	83	2.16925	225.392	73.2414	1.19425e+06
7	31.4286	106	1.72612	204.642	83.3144	1.44946e+06		6	37.8333	83	2.16915	225.308	73.2559	1.19754e+06
7	31.4286	106	1.72586	204.948	83.1975	1.44463e+06		6	37.8333	83	2.16937	225.418	73.2631	1.22629e+06
7	31.4286	106	1.72557	204.996	83.195	1.43841e+06		6	37.8333	83	2.16932	225.331	73.2652	1.2256e+06
7	31.4286	106	1.72573	205.379	83.0262	1.43128e+06		6	37.8333	83	2.17002	225.322	73.2918	1.22947e+06
7	31.4286	106	1.72608	205.584	82.9499	1.42829e+06		6	37.8333	83	2.17048	225.381	73.267	1.25577e+06
7	31.4286	106	1.72623	205.545	82.9789	1.42665e+06		6	37.8333	83	2.17109	225.423	73.2042	1.26515e+06
7	31.4286	106	1.72637	205.612	82.9544	1.4408e+06		6	37.8333	83	2.17076	225.448	73.1919	1.26507e+06
7	31.4286	106	1.7263	205.804	82.8475	1.4235e+06		6	37.8333	83	2.17053	225.482	73.1634	1.26187e+06
7	31.4286	106	1.72581	205.749	82.8586	1.45215e+06		6	37.8333	83	2.17092	225.432	73.1679	1.26195e+06
7	31.4286	106	1.72524	205.529	82.9552	1.45485e+06		6	37.8333	83	2.16957	225.496	73.1539	1.26191e+06
7	31.4286	106	1.72573	205.59	82.9419	1.45386e+06		6	37.8333	83	2.16991	225.455	73.1388	1.26749e+06
7	31.4286	106	1.72604	205.441	82.9658	1.45914e+06		6	37.8333	83	2.16911	225.551	73.0966	1.26566e+06
7	31.4286	106	1.72608	205.579	82.9529	1.45792e+06		6	37.8333	83	2.16919	225.437	73.144	1.24168e+06
7	31.4286	106	1.72631	205.81	82.8709	1.45657e+06		6	37.8333	83	2.16929	225.5	73.1326	1.23694e+06
7	31.4286	106	1.72601	205.835	82.8529	1.47225e+06		6	37.8333	83	2.16991	225.6	73.1169	1.22855e+06
7	31.4286	106	1.72618	206.078	82.7787	1.46672e+06		6	37.8333	83	2.17073	225.643	73.0807	1.27116e+06
7	31.4286	106	1.7254	206.001	82.8144	1.46747e+06		6	37.8333	83	2.17088	225.562	73.1095	1.27243e+06
7	31.4286	106	1.72563	206.095	82.7489	1.46227e+06		6	37.8333	83	2.17118	225.686	73.1046	1.26905e+06
7	31.4286	106	1.72563	206.405	82.6688	1.45922e+06		6	37.8333	83	2.17098	225.731	73.1024	1.25791e+06
7	31.4286	106	1.72582	206.233	82.7434	1.465e+06		6	37.8333	83	2.17084	225.675	73.0478	1.25687e+06
7	31.4286	106	1.72634	206.523	82.7035	1.45907e+06		6	37.8333	83	2.17185	225.585	73.1122	1.25766e+06
7	31.4286	106	1.72639	206.33	82.8053	1.46601e+06		6	37.8333	83	2.17264	225.64	73.1124	1.25851e+06
7	31.4286	106	1.72735	206.289	82.8282	1.45137e+06		6	37.8333	83	2.17389	225.921	73.0029	1.25287e+06
7	31.4286	106	1.72737	206.2	82.8585	1.45322e+06		6	37.8333	83	2.1734	225.834	73.0568	1.25472e+06
7	31.4286	106	1.72746	206.105	82.9233	1.45642e+06		6	37.8333	83	2.17277	225.716	73.1196	1.25603e+06
7	31.4286	106	1.72703	206.064	82.8832	1.45467e+06		6	37.8333	83	2.17274	225.585	73.1687	1.25732e+06
7	31.4286	106	1.72782	206.239	82.8686	1.45027e+06		6	37.8333	83	2.1735	225.703	73.1604	1.25489e+06
7	31.4286	106	1.72753	206.106	82.8877	1.45264e+06		6	37.8333	83	2.173	225.696	73.1476	1.2551e+06
7	31.4286	106	1.72732	205.942	82.9658	1.45822e+06		7	32.4286	83	2.17305	225.713	73.1391	1.25647e+06
7	31.4286	106	1.72685	206.057	82.9033	1.45401e+06		6	37.8333	83	2.1731	225.614	73.1425	1.26833e+06
7	31.4286	106	1.72648	206.072	82.9103	1.4527e+06		7	32.4286	83	2.17308	225.533	73.1872	1.25885e+06
7	31.4286	106	1.72639	206.138	82.8239	1.45005e+06		7	32.4286	83	2.17302	225.441	73.1589	1.26995e+06
7	31.4286	106	1.7265	206.252	82.7974	1.448e+06		6	37.8333	83	2.17303	225.425	73.1717	1.26989e+06
7	31.4286	106	1.7267	206.125	82.8092	1.45021e+06		6	37.8333	83	2.17265	225.402	73.1713	1.27185e+06
7	31.4286	106	1.72686	206.27	82.8081	1.41333e+06		6	37.8333	83	2.17254	225.46	73.1173	1.27268e+06
7	31.4286	106	1.72633	206.21	82.8149	1.41614e+06		6	37.8333	83	2.17281	225.561	73.0799	1.27041e+06
7	31.4286	106	1.72482	206.079	82.8558	1.41755e+06		6	37.8333	83	2.17207	225.466	73.0882	1.27539e+06
7	31.4286	106	1.72558	206.087	82.856	1.41741e+06		6	37.8333	83	2.17215	225.628	72.9944	1.27392e+06
7	31.4286	106	1.7258	205.989	82.92	1.42305e+06		6	37.8333	83	2.1719	225.532	73.0141	1.26842e+06
7	31.4286	106	1.72581	206.057	82.8507	1.42066e+06		6	37.8333	83	2.1716	225.59	72.9366	1.26825e+06
7	31.4286	106	1.72572	206.141	82.8143	1.4581e+06		6	37.8333	83	2.17175	225.574	72.9091	1.2675e+06
7	31.4286	106	1.72573	206.131	82.8407	1.41724e+06		6	37.8333	83	2.17254	225.594	72.9304	1.2685e+06
7	31.4286	106	1.72523	206.084	82.8389	1.4579e+06		7	32.4286	83	2.1726	225.616	72.9259	1.26561e+06
7	31.4286	106	1.72579	206.149	82.8583	1.45596e+06		7	32.4286	83	2.17232	225.585	72.9318	1.26642e+06
7	31.4286	106	1.72557	206.139	82.8286	1.45492e+06		7	32.4286	83	2.1719	225.606	72.9131	1.26904e+06
7	31.4286	106	1.72562	206.419	82.731	1.44804e+06		6	37.8333	83	2.17203	225.462	72.9727	1.26066e+06
7	31.4286	106	1.72652	206.305	82.7588	1.45092e+06		6	37.8333	83	2.17191	225.478	72.9572	1.272e+06
7	31.4286	106	1.72624	206.367	82.7458	1.45045e+06		6	37.8333	83	2.17154	225.49	72.9403	1.26983e+06
7	31.4286	106	1.72578	206.127	82.8199	1.45709e+06		6	37.8333	83	2.17192	225.5	72.9727	1.27047e+06
7	31.4286	106	1.72617	206.099	82.814	1.4574e+06		6	37.8333	83	2.17089	225.489	72.9424	1.26973e+06
7	31.4286	106	1.72526	205.816	82.8908	1.46519e+06		6	37.8333	83	2.17012	225.617	72.8806	1.26841e+06
7	31.4286	106	1.72646	205.987	82.7847	1.45798e+06		6	37.8333	83	2.17001	225.655	72.8259	1.26709e+06
7	31.4286	106	1.72685	206.248	82.7256	1.45385e+06		6	37.8333	83	2.1697	225.678	72.8236	1.26508e+06
7	31.4286	106	1.72733	206.302	82.7895	1.41715e+06		6	37.8333	83	2.16951	225.585	72.8478	1.27032e+06
7	31.4286	106	1.72709	206.088	82.8797	1.4243e+06		6	37.8333	83	2.17034	225.619	72.7863	1.27266e+06
7	31.4286	106	1.7276	206.331	82.8246	1.37863e+06		6	37.8333	83	2.17094	225.735	72.7489	1.27038e+06
7	31.4286	106	1.72718	206.292	82.8206	1.38077e+06		6	37.8333	83	2.17017	225.692	72.7133	1.27145e+06
7	31.4286	106	1.72752	206.327	82.851	1.37722e+06		6	37.8333	83	2.16965	225.679	72.6916	1.27876e+06
7	31.4286	106	1.72806	206.579	82.7629	1.41257e+06		6	37.8333	83	2.16911	225.729	72.6807	1.27757e+06
7	31.4286	106	1.72797	206.489	82.8244	1.37632e+06		6	37.8333	83	2.16823	225.692	72.652	1.27636e+06
7	31.4286	106	1.72746	206.365	82.8713	1.3782e+06		6	37.8333	83	2.16816	225.701	72.6774	1.27957e+06
7	31.4286	106	1.72748	206.208	82.934	1.38255e+06		6	37.8333	83	2.16741	225.623	72.7053	1.27938e+06
7	31.4286	106	1.72747	206.039	82.9493	1.38644e+06		6	37.8333	83	2.16741	225.674	72.7388	1.2787e+06
7	31.4286	106	1.72733	206.043	82.9763	1.42952e+06		6	37.8333	83	2.16707	225.558	72.788	1.28064e+06
7	31.4286	106	1.72747	205.898	83.0603	1.39815e+06		6	37.8333	83	2.16806	225.485	72.8432	1.28282e+06
7	31.4286	106	1.72773	205.867	83.1446	1.39969e+06		6	37.8333	83	2.16864	225.534	72.8092	1.28254e+06
7	31.4286	106	1.72752	205.907	83.0748	1.39615e+06		6	37.8333	83	2.16789	225.493	72.8337	1.28069e+06
7	31.4286	106	1.72757	205.905	83.1789	1.44397e+06		6	37.8333	83	2.16825	225.669	72.7286	1.27894e+06
7	31.4286	106	1.72716	206.021	83.1448	1.44383e+06		6	37.8333	83	2.1684	225.711	72.7218	1.27883e+06
7	31.4286	106	1.72757	205.879	83.1465	1.44018e+06		7	32.4286	80	2.16858	225.666	72.7325	1.27785e+06
7	31.4286	106	1.72735	205.885	83.1903	1.4334e+06		7	32.4286	80	2.16844	225.667	72.7282	1.27656e+06
7	31.4286	106	1.72769	206.098	83.0729	1.42657e+06		7	32.4286	80	2.16844	225.667	72.7282	1.27656e+06
7	31.4286	106	1.72794	206.04	83.1053	1.432e+06		7	32.4286	80	2.16912	225.636	72.7828	1.27778e+06
7	31.4286	106	1.72827	206.077	83.0782	1.43173e+06		7	32.4286	80	2.1687	225.759	72.6769	1.27607e+06
7	31.4286	106	1.72816	206.049	83.0706	1.4234e+06		7	32.4286	80	2.16903	225.712	72.6876	1.27659e+06
7	31.4286	106	1.72853	206.091	83.07	1.42521e+06		7	32.4286	80	2.16935	225.68	72.6789	1.27962e+06
7	31.4286	106	1.72849	206.377	82.918	1.42162e+06		7	32.4286	80	2.16944	225.6	72.6945	1.28012e+06
7	31.4286	106	1.72835	205.997	83.1199	1.43285e+06		7	32.4286	80	2.16976	225.73	72.7179	1.26731e+06
7	31.4286	106	1.72839	206.166	83.0375	1.42855e+06		7	32.4286	80	2.16939	225.535	72.7844	1.27167e+06
7	31.4286	106	1.72815	206.061	83.0729	1.43678e+06		7	32.4286	80	2.17008	225.436	72.8048	1.27009e+06
7	31.4286	106	1.7285	205.892	83.1356	1.43705e+06		7	32.4286	80	2.16982	225.35	72.8892	1.26947e+06
7	31.4286	106	1.72826	205.812	83.2064	1.4364e+06		6	37.8333	83	2.16858	225.214	72.939	1.27735e+06
7	31.4286	106	1.72781	205.86	83.1475	1.44187e+06		6	37.8333	83	2.16966	225.15	72.9714	1.27236e+06
7	31.2857	104	1.67955	182.928	103.176	1.702e+06		10	22.6	75	1.92331	197.597	89.2882	1.32135e+06
8	27.375	100	1.68002	182.779	103.209	1.62585e+06		10	22.6	75	1.92306	197.475	89.3541	1.32211e+06
7	31.2857	104	1.67882	182.833	103.183	1.68659e+06		10	22.6	75	1.92302	197.475	89.356	1.32476e+06
7	31.2857	104	1.67986	183.007	103.049	1.67351e+06		10	22.6	75	1.92245	197.464	89.359	1.3286e+06
7	31.2857	104	1.67923	183.119	103.049	1.68142e+06		10	22.6	75	1.92232	197.474	89.3575	1.3271e+06
7	31.2857	104	1.68027	183.479	103.099	1.68858e+06		10	22.6	75	1.92257	197.486	89.3546	1.33114e+06
7	31.2857	104	1.68064	183.865	102.938	1.65627e+06		10	22.6	75	1.92256	197.387	89.383	1.33326e+06
7	31.2857	104	1.68153	184.096	102.994	1.65158e+06		10	22.6	75	1.9231	197.422	89.3702	1.33058e+06
8	27.375	63	1.68118	184.097	103.107	1.65107e+06		10	22.6	75	1.92305	197.397	89.3814	1.33329e+06
8	27.375	63	1.68057	184.245	102.988	1.6458e+06		10	22.6	75	1.92276	197.457	89.3589	1.32929e+06
8	27.375	63	1.6798	183.958	103.03	1.6522e+06		10	22.6	75	1.92322	197.47	89.3543	1.32693e+06
8	27.375	63	1.67975	183.847	103.022	1.6645e+06		10	22.6	75	1.92332	197.551	89.3548	1.32263e+06
8	27.375	63	1.67935	184.133	102.919	1.642e+06		10	22.6	75	1.9234	197.535	89.356	1.31853e+06
8	27.375	63	1.67937	183.818	102.976	1.63507e+06		10	22.6	75	1.92354	197.519	89.3732	1.32358e+06
8	27.375	63	1.68027	183.682	103.089	1.64703e+06		10	22.6	75	1.92363	197.521	89.3931	1.32461e+06
8	27.375	63	1.68133	183.948	103.032	1.65629e+06		10	22.6	75	1.92366	197.469	89.4193	1.32364e+06
8	27.375	63	1.68146	184.334	102.974	1.65277e+06		10	22.6	75	1.92355	197.468	89.432	1.3195e+06
8	27.375	63	1.68117	184.272	103.045	1.64976e+06		10	22.6	75	1.92345	197.509	89.4081	1.31873e+06
8	27.375	63	1.68258	184.631	102.766	1.62918e+06		10	22.6	75	1.92341	197.531	89.4038	1.31679e+06
8	27.375	63	1.68293	184.715	102.792	1.61138e+06		10	22.6	75	1.92332	197.516	89.4078	1.31473e+06
8	27.375	63	1.6832	184.416	103.02	1.62621e+06		10	22.6	75	1.92363	197.55	89.4032	1.31237e+06
8	27.375	63	1.68366	184.457	102.873	1.63111e+06		10	22.6	75	1.92345	197.53	89.3901	1.31366e+06
8	27.375	63	1.68353	184.587	102.853	1.63415e+06		10	22.6	75	1.92355	197.662	89.3323	1.31087e+06
8	27.375	63	1.68409	184.668	102.832	1.64252e+06		10	22.6	75	1.92378	197.606	89.3533	1.31717e+06
8	27.375	63	1.68475	184.819	102.728	1.63252e+06		10	22.6	75	1.92295	197.565	89.3927	1.31811e+06
8	27.375	63	1.68451	185.282	102.481	1.6006e+06		10	22.6	75	1.92235	197.587	89.3893	1.32058e+06
8	27.375	63	1.68484	185.318	102.525	1.62072e+06		10	22.6	75	1.92234	197.576	89.385	1.31958e+06
8	27.375	63	1.6846	185.445	102.43	1.6117e+06		10	22.6	75	1.92209	197.601	89.3811	1.31536e+06
8	27.375	63	1.68435	185.12	102.553	1.62564e+06		10	22.6	75	1.92205	197.555	89.402	1.31701e+06
8	27.375	63	1.68451	185.034	102.566	1.62943e+06		10	22.6	75	1.92209	197.671	89.3368	1.31429e+06
8	27.375	63	1.6845	185.041	102.636	1.64211e+06		10	22.6	75	1.92173	197.612	89.3503	1.3245e+06
8	27.375	63	1.68401	184.904	102.57	1.66938e+06		10	22.6	75	1.9211	197.536	89.3754	1.34371e+06
8	27.375	63	1.68516	184.814	102.539	1.67466e+06		10	22.6	75	1.92127	197.61	89.3466	1.32476e+06
8	27.375	63	1.6846	184.674	102.534	1.67914e+06		10	22.6	75	1.92152	197.596	89.3349	1.34349e+06
8	27.375	63	1.68487	185.042	102.362	1.67033e+06		10	22.6	75	1.92218	197.541	89.3549	1.31248e+06
8	27.375	63	1.68523	184.845	102.464	1.67662e+06		10	22.6	75	1.922	197.472	89.362	1.31495e+06
8	27.375	63	1.68497	184.901	102.549	1.65402e+06		10	22.6	75	1.92186	197.429	89.376	1.31495e+06
8	27.375	63	1.68441	185.119	102.332	1.65612e+06		10	22.6	75	1.92176	197.464	89.3719	1.33038e+06
8	27.375	63	1.68389	185.277	102.224	1.66778e+06		10	22.6	75	1.922	197.467	89.3735	1.3118e+06
8	27.375	63	1.68402	185.214	102.358	1.66079e+06		10	22.6	75	1.92184	197.386	89.3968	1.31607e+06
8	27.375	63	1.6829	184.971	102.481	1.67073e+06		10	22.6	75	1.92216	197.375	89.4046	1.31339e+06
8	27.375	63	1.68258	185.347	102.312	1.65623e+06		10	22.6	75	1.92229	197.33	89.4293	1.30962e+06
8	27.375	63	1.68198	185.053	102.438	1.66795e+06		10	22.6	75	1.92196	197.344	89.4306	1.31223e+06
8	27.375	63	1.68146	185.363	102.318	1.65638e+06		10	22.6	75	1.92212	197.407	89.4008	1.30784e+06
8	27.375	63	1.68169	185.208	102.394	1.66482e+06		10	22.6	75	1.92131	197.409	89.3898	1.32529e+06
8	27.375	63	1.68172	185.019	102.514	1.6773e+06		10	22.6	75	1.92085	197.373	89.4066	1.33205e+06
7	31.2857	94	1.68208	184.965	102.539	1.67877e+06		10	22.6	75	1.92052	197.442	89.3944	1.32929e+06
7	31.2857	94	1.68324	184.962	102.545	1.68695e+06		10	22.6	75	1.9208	197.502	89.3858	1.29725e+06
8	27.375	63	1.68331	184.818	102.621	1.69066e+06		10	22.6	75	1.92092	197.569	89.3589	1.33374e+06
7	31.2857	94	1.68371	184.894	102.667	1.73914e+06		10	22.6	75	1.9211	197.492	89.3987	1.31665e+06
7	31.2857	94	1.68369	185.111	102.581	1.72992e+06		10	22.6	75	1.9205	197.497	89.3925	1.30134e+06
7	31.2857	94	1.68448	184.923	102.699	1.69e+06		10	22.6	75	1.921	197.526	89.3817	1.31673e+06
7	31.2857	94	1.68446	184.988	102.712	1.69732e+06		10	22.6	75	1.92041	197.52	89.3842	1.31558e+06
7	31.2857	94	1.68449	184.584	102.81	1.70925e+06		10	22.6	75	1.92016	197.513	89.3487	1.30802e+06
7	31.2857	94	1.68517	184.773	102.78	1.708e+06		10	22.6	75	1.92049	197.616	89.3106	1.31783e+06
7	31.2857	94	1.68462	184.922	102.778	1.7137e+06		10	22.6	75	1.92093	197.693	89.2963	1.3154e+06
7	31.2857	94	1.6849	184.936	102.693	1.63602e+06		10	22.6	75	1.92066	197.694	89.2819	1.31697e+06
7	31.2857	94	1.68549	184.941	102.678	1.63446e+06		10	22.6	75	1.92137	197.706	89.2901	1.3132e+06
7	31.2857	94	1.68476	184.865	102.692	1.63099e+06		10	22.6	75	1.92056	197.788	89.2536	1.31235e+06
7	31.2857	94	1.68551	185.059	102.769	1.60776e+06		10	22.6	75	1.92089	197.869	89.2308	1.30879e+06
7	31.2857	94	1.68573	185.046	102.664	1.62182e+06		10	22.6	75	1.92058	197.893	89.212	1.3069e+06
7	31.2857	94	1.6851	184.748	102.671	1.62952e+06		10	22.6	75	1.92074	197.892	89.2011	1.30524e+06
7	31.2857	94	1.68468	184.696	102.661	1.62632e+06		10	22.6	75	1.92071	197.918	89.2046	1.31112e+06
7	31.2857	94	1.68396	184.424	102.85	1.62618e+06		10	22.6	75	1.92051	197.854	89.2309	1.31327e+06
7	31.2857	94	1.6842	184.488	102.823	1.62326e+06		10	22.6	75	1.92034	197.977	89.1758	1.30898e+06
7	31.2857	94	1.68393	184.676	102.667	1.61739e+06		10	22.6	75	1.92034	197.977	89.1758	1.30898e+06
7	31.2857	94	1.68414	184.636	102.732	1.61952e+06		10	22.6	75	1.9205	197.923	89.194	1.31257e+06
7	31.2857	94	1.68455	184.691	102.749	1.63677e+06		10	22.6	75	1.92076	198.072	89.1555	1.30597e+06
7	31.2857	94	1.68461	184.889	102.626	1.647e+06		10	22.6	75	1.92087	198.027	89.1845	1.30877e+06
7	31.2857	94	1.6836	184.808	102.627	1.63023e+06		10	22.6	75	1.9207	198.028	89.1815	1.30873e+06
7	31.2857	94	1.68427	184.826	102.51	1.68819e+06		10	22.6	75	1.92104	197.958	89.2033	1.30346e+06
7	31.2857	94	1.68385	184.652	102.54	1.69554e+06		10	22.6	75	1.92083	198.049	89.1518	1.30244e+06
8	27.375	63	1.68349	184.53	102.506	1.71881e+06		10	22.6	75	1.92077	197.925	89.1964	1.31266e+06
7	31.2857	94	1.68281	184.649	102.469	1.69449e+06		10	22.6	75	1.92139	197.908	89.2106	1.31209e+06
7	31.2857	94	1.6822	184.615	102.419	1.69354e+06		10	22.6	75	1.92078	197.928	89.1987	1.30019e+06
7	31.2857	94	1.68293	184.725	102.374	1.70668e+06		10	22.6	75	1.92086	197.882	89.2015	1.30105e+06
7	31.2857	94	1.68342	184.484	102.537	1.71458e+06		10	22.6	75	1.92052	197.975	89.1874	1.3005e+06
7	31.2857	94	1.68298	184.599	102.542	1.70691e+06		10	22.6	75	1.92086	197.94	89.2002	1.29799e+06
7	31.2857	94	1.68246	184.316	102.65	1.71303e+06		10	22.6	75	1.92114	198.012	89.1596	1.29839e+06
7	31.2857	94	1.68246	183.889	102.821	1.73547e+06		10	22.6	75	1.92123	198.024	89.1465	1.30062e+06
7	31.2857	94	1.68321	183.645	102.906	1.73641e+06		10	22.6	75	1.92104	197.996	89.1501	1.30001e+06
7	31.2857	94	1.68272	183.72	102.849	1.80403e+06		10	22.6	75	1.92079	198.09	89.1155	1.29946e+06
7	31.2857	94	1.68304	183.65	102.894	1.81579e+06		10	22.6	75	1.92015	198.144	89.1028	1.29668e+06
7	31.2857	94	1.68327	183.69	102.902	1.83244e+06		10	22.6	75	1.92015	198.11	89.1079	1.29632e+06
7	31.2857	94	1.68309	183.596	102.894	1.83114e+06		10	22.6	75	1.92029	198.124	89.1105	1.29459e+06
7	31.2857	94	1.68296	183.65	102.899	1.81962e+06		10	22.6	75	1.92052	198.066	89.1396	1.29497e+06
7	31.2857	94	1.68248	183.682	102.928	1.7636e+06		10	22.6	75	1.92033	198.035	89.1374	1.29415e+06
7	31.2857	94	1.68234	183.751	103.045	1.76119e+06		10	22.6	75	1.91987	198.026	89.1181	1.29446e+06
7	31.2857	94	1.6824	183.812	103.047	1.75205e+06		10	22.6	75	1.92025	198.186	89.0757	1.28998e+06
7	31.2857	94	1.68212	183.704	103.056	1.74976e+06		10	22.6	75	1.92022	198.082	89.1095	1.29373e+06
7	31.2857	94	1.68243	183.874	102.938	1.79768e+06		10	22.6	75	1.92032	198.149	89.0915	1.29085e+06
7	31.2857	94	1.68281	183.977	102.953	1.78733e+06		10	22.6	75	1.92054	198.139	89.091	1.29713e+06
7	31.2857	94	1.68235	183.951	102.924	1.75811e+06		10	22.6	75	1.92033	198.09	89.1044	1.29035e+06
7	31.2857	94	1.68207	184.001	102.912	1.71743e+06		10	22.6	75	1.91971	198.089	89.1037	1.29066e+06
7	31.2857	94	1.6818	184.015	102.895	1.71e+06		10	22.6	75	1.91976	198.09	89.1059	1.29797e+06
7	31.2857	94	1.68213	183.995	102.931	1.72751e+06		10	22.6	75	1.91977	198.124	89.0812	1.29667e+06
7	31.2857	94	1.68246	183.793	103.063	1.7227e+06		10	22.6	75	1.91961	198.186	89.0636	1.29296e+06
7	31.2857	94	1.68278	183.788	103.022	1.72582e+06		10	22.6	75	1.91948	198.176	89.0678	1.28931e+06
7	31.2857	94	1.68262	183.963	102.954	1.71111e+06		10	22.6	75	1.91941	198.17	89.0816	1.28842e+06
7	31.2857	94	1.68213	184.339	102.681	1.6943e+06		10	22.6	75	1.91962	198.144	89.0936	1.29023e+06
12	18.3333	48	1.69753	180.302	98.7585	2.02701e+06		8	28.375	84	1.86612	211.097	83.9274	1.5439e+06
12	18.3333	48	1.69863	180.439	98.6928	2.03881e+06		8	28.375	84	1.86702	211.11	83.8804	1.53725e+06
12	18.3333	48	1.6985	180.605	98.5677	2.00811e+06		8	28.375	84	1.86693	211.183	83.844	1.54869e+06
12	18.3333	48	1.698	180.58	98.623	2.00891e+06		7	32.4286	100	1.86663	210.923	83.9074	1.55416e+06
12	18.3333	48	1.69787	180.557	98.6125	2.01935e+06		8	28.375	84	1.86647	211.231	83.8724	1.54358e+06
12	18.3333	48	1.69745	180.506	98.6741	2.02207e+06		8	28.375	84	1.86611	211.078	83.905	1.55623e+06
11	20	58	1.69779	180.517	98.6761	2.01301e+06		8	28.375	84	1.86569	211.251	83.8943	1.54357e+06
11	20	58	1.69712	180.528	98.6696	2.01581e+06		8	28.375	84	1.86612	211.139	83.8714	1.54543e+06
11	20	58	1.69795	180.627	98.6432	2.01344e+06		8	28.375	84	1.86664	211.071	83.8829	1.54532e+06
11	20	58	1.69794	180.64	98.621	2.01866e+06		8	28.375	84	1.86606	210.772	83.9239	1.55663e+06
11	20	58	1.69775	180.581	98.6867	2.02058e+06		8	28.375	84	1.86625	210.894	83.844	1.57121e+06
11	20	58	1.69826	180.609	98.6392	2.0181e+06		8	28.375	84	1.86613	210.825	83.9096	1.55771e+06
11	20	58	1.69789	180.568	98.66	2.01279e+06		7	32.4286	100	1.86592	210.998	83.8825	1.54992e+06
11	20	58	1.69713	180.486	98.7136	2.02054e+06		7	32.4286	100	1.86611	211.12	83.8237	1.54214e+06
11	20	58	1.69698	180.503	98.6655	2.01813e+06		7	32.4286	100	1.86646	210.704	83.9315	1.55028e+06
11	20	58	1.69747	180.365	98.7315	2.0245e+06		7	32.4286	100	1.86617	210.777	83.9198	1.55144e+06
11	20	58	1.69822	180.38	98.765	2.02431e+06		7	32.4286	100	1.86612	211.124	83.812	1.53838e+06
11	20	58	1.69838	180.455	98.7104	2.02142e+06		7	32.4286	100	1.86591	211.355	83.7609	1.53105e+06
11	20	58	1.69786	180.434	98.7177	2.02327e+06		7	32.4286	100	1.86602	211.161	83.7839	1.56093e+06
11	20	58	1.69844	180.412	98.7162	2.04493e+06		7	32.4286	100	1.86623	211.013	83.8127	1.54459e+06
11	20	58	1.69802	180.53	98.6302	2.01612e+06		7	32.4286	100	1.86684	211.078	83.7847	1.56639e+06
11	20	58	1.69763	180.47	98.6872	2.01934e+06		7	32.4286	100	1.86706	211.262	83.7433	1.5615e+06
11	20	58	1.69811	180.46	98.7634	2.02267e+06		7	32.4286	100	1.86716	211.37	83.6969	1.55922e+06
11	20	58	1.69801	180.521	98.7266	2.02015e+06		7	32.4286	100	1.86721	210.858	83.8951	1.57902e+06
11	20	58	1.69818	180.482	98.7501	2.02197e+06		7	32.4286	100	1.86701	210.712	83.9318	1.58141e+06
11	20	58	1.69816	180.517	98.7434	2.02087e+06		7	32.4286	100	1.86786	210.762	83.9223	1.5824e+06
11	20	58	1.69885	180.508	98.7542	2.01953e+06		7	32.4286	100	1.86708	210.672	83.9326	1.58495e+06
11	20	58	1.69811	180.476	98.7174	2.01612e+06		7	32.4286	100	1.86781	210.534	83.9666	1.58509e+06
11	20	58	1.69762	180.505	98.7401	2.01355e+06		7	32.4286	100	1.86758	210.495	84.0342	1.5861e+06
11	20	58	1.6973	180.508	98.7534	2.01567e+06		8	28.375	84	1.86758	210.192	84.107	1.58788e+06
11	20	58	1.69738	180.543	98.7316	2.01218e+06		7	32.4286	100	1.86738	210.075	84.139	1.59524e+06
11	20	58	1.69731	180.528	98.7817	2.01827e+06		7	32.4286	100	1.86729	210.316	84.1002	1.58677e+06
11	20	58	1.69649	180.475	98.805	2.0217e+06		7	32.4286	100	1.86789	210.739	83.9498	1.57068e+06
11	20	58	1.69664	180.457	98.8277	2.02068e+06		7	32.4286	100	1.86752	210.606	83.9977	1.57581e+06
11	20	58	1.69643	180.414	98.8444	2.02327e+06		7	32.4286	100	1.86898	210.617	84.0624	1.56479e+06
11	20	58	1.6967	180.548	98.7614	2.00744e+06		7	32.4286	100	1.86894	210.703	84.0098	1.58034e+06
11	20	58	1.69599	180.497	98.8626	2.01665e+06		7	32.4286	100	1.8691	210.972	83.932	1.57999e+06
11	20	58	1.69675	180.491	98.8439	2.02126e+06		7	32.4286	100	1.86906	211.124	83.914	1.57374e+06
11	20	58	1.69667	180.415	98.8857	2.02928e+06		7	32.4286	100	1.8689	211.143	83.8974	1.56373e+06
11	20	58	1.6965	180.39	98.8826	2.0349e+06		7	32.4286	100	1.86844	210.979	83.9384	1.55322e+06
11	20	58	1.6967	180.469	98.9123	2.03546e+06		7	32.4286	100	1.8685	211.184	83.924	1.54561e+06
11	20	58	1.69698	180.417	98.9296	2.03773e+06		7	32.4286	100	1.86867	210.888	84.0242	1.55575e+06
11	20	58	1.69758	180.389	98.907	2.04952e+06		7	32.4286	100	1.86838	210.898	84.0045	1.54977e+06
11	20	58	1.69737	180.531	98.7854	2.05001e+06		7	32.4286	100	1.86886	210.788	84.0287	1.56974e+06
11	20	58	1.69791	180.565	98.7821	2.04496e+06		7	32.4286	100	1.86918	210.804	83.9958	1.5699e+06
11	20	58	1.69749	180.577	98.7953	2.04554e+06		7	32.4286	100	1.86919	210.831	83.9907	1.55083e+06
11	20	58	1.69711	180.579	98.8	2.0318e+06		7	32.4286	100	1.86912	211.074	83.9287	1.54577e+06
11	20	58	1.69718	180.608	98.7904	2.03211e+06		7	32.4286	100	1.86959	211.161	83.9546	1.55047e+06
11	20	58	1.69736	180.569	98.8248	2.02846e+06		7	32.4286	100	1.86995	211.3	83.9608	1.54445e+06
12	18.3333	48	1.69736	180.576	98.844	2.03585e+06		7	32.4286	100	1.86981	211.247	83.9735	1.54444e+06
11	20	58	1.69758	180.564	98.8277	2.03087e+06		8	28.375	84	1.86965	211.526	83.9505	1.53664e+06
11	20	58	1.69704	180.483	98.9473	2.02855e+06		7	32.4286	100	1.87037	211.603	83.9167	1.53403e+06
12	18.3333	48	1.69666	180.425	98.9826	2.03798e+06		8	28.375	84	1.86947	211.575	83.9241	1.53964e+06
12	18.3333	48	1.69742	180.444	98.9584	2.02792e+06		7	32.4286	100	1.87001	211.57	83.9527	1.5383e+06
12	18.3333	48	1.69757	180.503	98.9453	2.04715e+06		7	32.4286	100	1.87	211.614	83.9192	1.53443e+06
12	18.3333	48	1.69712	180.434	98.9723	2.03124e+06		7	32.4286	100	1.87015	211.756	83.8755	1.52905e+06
12	18.3333	48	1.6964	180.417	99.0128	2.03333e+06		7	32.4286	100	1.86995	211.911	83.8828	1.52115e+06
12	18.3333	48	1.69609	180.4	99.0684	2.04417e+06		7	32.4286	100	1.87022	211.859	83.8776	1.52503e+06
12	18.3333	48	1.69659	180.456	99.0126	2.03856e+06		7	32.4286	100	1.86947	212.177	83.7966	1.51101e+06
12	18.3333	48	1.69678	180.507	98.9614	2.03566e+06		7	32.4286	100	1.86881	212.331	83.7381	1.51303e+06
12	18.3333	48	1.69686	180.57	98.8891	2.02255e+06		7	32.4286	100	1.86882	212.066	83.757	1.52199e+06
12	18.3333	48	1.69705	180.583	98.876	2.02115e+06		7	32.4286	100	1.86842	212.185	83.769	1.52125e+06
12	18.3333	48	1.6967	180.606	98.9062	2.0291e+06		7	32.4286	100	1.86933	212.073	83.8053	1.52551e+06
12	18.3333	48	1.69679	180.568	98.9219	2.04808e+06		7	32.4286	100	1.86898	211.875	83.8616	1.53267e+06
12	18.3333	48	1.69699	180.634	98.822	2.03316e+06		7	32.4286	100	1.86948	211.696	83.8976	1.53991e+06
11	20	58	1.69754	180.612	98.8638	2.03531e+06		7	32.4286	100	1.8693	211.438	83.9453	1.54938e+06
12	18.3333	48	1.69777	180.548	98.8771	2.03221e+06		7	32.4286	100	1.86888	211.557	83.9447	1.54337e+06
12	18.3333	48	1.69795	180.554	98.9098	2.04193e+06		7	32.4286	100	1.86909	211.396	83.925	1.54705e+06
11	20	58	1.69781	180.635	98.8947	2.04426e+06		7	32.4286	100	1.86917	211.734	83.8534	1.53649e+06
11	20	58	1.69779	180.666	98.9121	2.03835e+06		7	32.4286	100	1.86842	211.42	83.9069	1.54496e+06
11	20	58	1.69807	180.749	98.8708	2.03121e+06		7	32.4286	100	1.86822	211.039	83.9767	1.55897e+06
11	20	58	1.69726	180.68	98.8985	2.04123e+06		7	32.4286	100	1.86835	211.18	83.9567	1.5581e+06
11	20	58	1.69787	180.641	98.919	2.043e+06		7	32.4286	100	1.86851	211.241	83.9663	1.55367e+06
11	20	58	1.69825	180.67	98.8998	2.03967e+06		7	32.4286	100	1.86882	211.402	83.9661	1.54795e+06
11	20	58	1.69836	180.687	98.827	2.03566e+06		7	32.4286	100	1.86836	211.582	83.8996	1.53598e+06
11	20	58	1.6983	180.662	98.8983	2.04001e+06		7	32.4286	100	1.86867	211.516	83.9256	1.53971e+06
11	20	58	1.69792	180.647	98.8902	2.03945e+06		7	32.4286	100	1.86896	211.589	83.8788	1.53488e+06
11	20	58	1.69809	180.597	98.9657	2.0403e+06		7	32.4286	100	1.8685	211.486	83.9007	1.53433e+06
11	20	58	1.69812	180.556	99.0144	2.04812e+06		7	32.4286	100	1.86901	211.058	83.9758	1.54669e+06
11	20	58	1.69706	180.368	99.0439	2.04047e+06		7	32.4286	100	1.86858	211.005	84.0494	1.55582e+06
11	20	58	1.69781	180.533	98.9668	2.03373e+06		7	32.4286	100	1.86826	210.651	84.156	1.56466e+06
11	20	58	1.69829	180.573	98.9511	2.02089e+06		7	32.4286	100	1.86806	210.632	84.1383	1.56406e+06
11	20	58	1.69875	180.671	98.8742	2.04694e+06		7	32.4286	100	1.86788	210.491	84.2521	1.57259e+06
11	20	58	1.69864	180.718	98.8685	2.04851e+06		7	32.4286	100	1.86817	210.427	84.29	1.57613e+06
11	20	58	1.69928	180.85	98.7985	2.03142e+06		7	32.4286	100	1.8686	210.491	84.3002	1.5728e+06
11	20	58	1.6994	180.806	98.7981	2.02872e+06		7	32.4286	100	1.86845	210.571	84.2813	1.56414e+06
11	20	58	1.69872	180.805	98.8132	2.04075e+06		7	32.4286	100	1.8686	210.608	84.3032	1.56393e+06
11	20	58	1.69853	180.789	98.7923	2.04429e+06		7	32.4286	100	1.8684	210.27	84.4148	1.56402e+06
11	20	58	1.69936	180.821	98.7717	2.04189e+06		7	32.4286	100	1.86854	210.448	84.3226	1.56866e+06
11	20	58	1.69969	180.77	98.7707	2.03552e+06		7	32.4286	100	1.86845	210.686	84.2634	1.55197e+06
11	20	58	1.6993	180.838	98.7195	2.04024e+06		7	32.4286	100	1.86878	210.969	84.2067	1.54957e+06
11	20	58	1.69957	180.817	98.7497	2.05248e+06		7	32.4286	100	1.86892	210.8	84.2239	1.55662e+06
11	20	58	1.69937	180.68	98.8188	2.03001e+06		7	32.4286	100	1.8687	210.895	84.2057	1.5522e+06
11	20	58	1.70029	180.739	98.7649	2.0376e+06		7	32.4286	100	1.86839	210.876	84.1846	1.55876e+06
11	20	58	1.69942	180.777	98.7721	2.0391e+06		7	32.4286	100	1.86881	210.91	84.1929	1.55784e+06
11	20	58	1.69906	180.659	98.8436	2.04584e+06		7	32.4286	100	1.86865	211.026	84.1974	1.55276e+06
11	20	58	1.6994	180.559	98.9229	2.04495e+06		7	32.4286	100	1.86913	211.013	84.1745	1.55034e+06
11	20	58	1.6995	180.567	98.925	2.03926e+06		7	32.4286	100	1.86911	210.77	84.244	1.5603e+06
11	20	58	1.70037	180.663	98.847	2.03597e+06		7	32.4286	100	1.86946	210.869	84.1954	1.55975e+06
11	20	58	1.69982	180.649	98.8495	2.03516e+06		7	32.4286	100	1.86933	210.87	84.1525	1.55822e+06
10	21.8	99	1.53383	181.243	100.052	1.8557e+06		8	28.375	107	1.85258	201.061	102.955	1.27866e+06
10	21.8	99	1.53416	181.26	100.07	1.85683e+06		7	32.4286	115	1.85202	201.266	102.949	1.25303e+06
10	21.8	99	1.53394	181.225	100.11	1.85373e+06		7	32.4286	115	1.85184	201.145	102.932	1.25609e+06
10	21.8	99	1.5335	181.245	100.043	1.85375e+06		7	32.4286	115	1.85184	201.145	102.932	1.25609e+06
10	21.8	99	1.5334	181.328	99.9121	1.84476e+06		7	32.4286	115	1.85229	201.081	102.957	1.24665e+06
10	21.8	99	1.53313	181.358	99.8582	1.83899e+06		7	32.4286	115	1.85291	201.122	102.964	1.24891e+06
10	21.8	99	1.53292	181.297	100.127	1.83304e+06		8	28.375	107	1.8533	201.169	102.882	1.25532e+06
10	21.8	99	1.53311	181.37	99.9397	1.8387e+06		8	28.375	107	1.85321	201.096	102.769	1.26801e+06
10	21.8	99	1.53311	181.37	99.9397	1.8387e+06		8	28.375	107	1.85337	201.137	102.815	1.25202e+06
10	21.8	99	1.53299	181.294	100.05	1.84604e+06		8	28.375	107	1.85336	200.874	102.927	1.27188e+06
10	21.8	99	1.53296	181.406	99.9021	1.83322e+06		8	28.375	107	1.85403	201.177	102.895	1.2674e+06
10	21.8	99	1.53254	181.586	99.5677	1.82778e+06		8	28.375	107	1.85351	201.734	102.866	1.24847e+06
10	21.8	99	1.53247	181.581	99.6376	1.82042e+06		8	28.375	107	1.85341	201.457	102.862	1.24445e+06
10	21.8	99	1.53229	181.529	99.6646	1.81941e+06		8	28.375	107	1.85463	201.676	102.972	1.2378e+06
10	21.8	99	1.53227	181.393	99.8156	1.83352e+06		8	28.375	107	1.85414	201.598	102.87	1.22774e+06
10	21.8	99	1.53236	181.607	99.6451	1.81619e+06		8	28.375	107	1.85445	201.599	102.892	1.22818e+06
10	21.8	99	1.53265	181.596	99.7084	1.82045e+06		8	28.375	107	1.85383	201.894	102.743	1.22098e+06
10	21.8	99	1.53259	181.482	99.8608	1.82355e+06		8	28.375	107	1.85327	201.77	102.795	1.22662e+06
10	21.8	99	1.53266	181.41	99.9199	1.84247e+06		8	28.375	107	1.85352	201.937	102.778	1.24263e+06
10	21.8	99	1.53233	181.408	99.9413	1.83393e+06		8	28.375	107	1.85344	201.716	102.852	1.24974e+06
10	21.8	99	1.53239	181.34	99.9839	1.83516e+06		8	28.375	107	1.85316	201.841	102.733	1.25278e+06
10	21.8	99	1.53247	181.401	99.9444	1.83314e+06		8	28.375	107	1.85359	201.724	102.733	1.23746e+06
10	21.8	99	1.53294	181.542	99.7971	1.82903e+06		8	28.375	107	1.85339	201.8	102.641	1.2692e+06
10	21.8	99	1.53302	181.479	99.7704	1.83991e+06		8	28.375	107	1.85429	201.9	102.635	1.25823e+06
10	21.8	99	1.5328	180.978	100.419	1.89593e+06		8	28.375	107	1.85446	202.027	102.599	1.25646e+06
10	21.8	99	1.53265	181.14	100.37	1.87295e+06		8	28.375	107	1.85433	202.077	102.487	1.25369e+06
10	21.8	99	1.53281	181.034	100.401	1.87614e+06		8	28.375	107	1.85451	202.254	102.399	1.25968e+06
10	21.8	99	1.533	181.437	100.029	1.85891e+06		8	28.375	107	1.85491	202.261	102.449	1.2469e+06
10	21.8	99	1.53316	181.663	99.6772	1.83342e+06		8	28.375	107	1.85471	202.085	102.484	1.25279e+06
10	21.8	99	1.533	181.599	99.8129	1.85164e+06		8	28.375	107	1.85445	201.927	102.485	1.25926e+06
10	21.8	99	1.53275	181.638	99.6413	1.81743e+06		8	28.375	107	1.85434	201.992	102.413	1.29775e+06
10	21.8	99	1.53297	181.642	99.6769	1.81726e+06		8	28.375	107	1.8548	202.006	102.422	1.30233e+06
10	21.8	99	1.53284	181.636	99.6511	1.81246e+06		8	28.375	107	1.85447	201.849	102.513	1.30504e+06
10	21.8	99	1.53293	181.706	99.6503	1.80729e+06		8	28.375	107	1.85401	201.756	102.508	1.28154e+06
10	21.8	99	1.53303	181.516	99.8598	1.81562e+06		8	28.375	107	1.85466	201.734	102.561	1.26445e+06
10	21.8	99	1.5332	181.721	99.6861	1.81134e+06		8	28.375	107	1.85396	201.899	102.449	1.27121e+06
10	21.8	99	1.53299	181.813	99.5733	1.80941e+06		8	28.375	107	1.85396	201.745	102.436	1.27302e+06
10	21.8	99	1.53281	181.734	99.7371	1.81501e+06		8	28.375	107	1.85405	201.813	102.491	1.27097e+06
10	21.8	99	1.53305	181.686	99.8179	1.81728e+06		8	28.375	107	1.85401	202.07	102.397	1.27118e+06
10	21.8	99	1.53321	181.68	99.6528	1.81376e+06		8	28.375	107	1.85258	202.129	102.063	1.24656e+06
10	21.8	99	1.53324	181.784	99.5438	1.8119e+06		8	28.375	107	1.85373	202.524	101.806	1.25335e+06
10	21.8	99	1.5332	182.003	99.3716	1.80695e+06		8	28.375	107	1.85414	202.443	101.878	1.26049e+06
10	21.8	99	1.53332	181.843	99.5195	1.8091e+06		8	28.375	107	1.85485	202.419	102.074	1.26316e+06
10	21.8	99	1.53335	181.99	99.3229	1.80514e+06		8	28.375	107	1.85446	202.108	102.314	1.26137e+06
10	21.8	99	1.53317	182.06	99.2824	1.80266e+06		8	28.375	107	1.85508	202.329	102.303	1.25067e+06
10	21.8	99	1.53278	182.206	98.9879	1.79448e+06		8	28.375	107	1.85522	202.458	102.244	1.24857e+06
10	21.8	99	1.53269	182.044	99.0266	1.79679e+06		8	28.375	107	1.85465	202.118	102.433	1.25732e+06
10	21.8	99	1.53255	181.979	99.2143	1.80183e+06		8	28.375	107	1.85472	202.305	102.432	1.23855e+06
10	21.8	99	1.53251	182.017	99.1233	1.79993e+06		8	28.375	107	1.85445	202.068	102.528	1.21951e+06
10	21.8	99	1.53251	182.017	99.1233	1.79993e+06		8	28.375	107	1.85288	202.092	102.374	1.22572e+06
10	21.8	99	1.53283	182.078	99.1532	1.8051e+06		8	28.375	107	1.85247	201.519	102.479	1.24674e+06
10	21.8	99	1.53269	182.204	99.0453	1.79702e+06		7	32.4286	115	1.85331	201.847	102.531	1.23672e+06
10	21.8	99	1.53278	182.063	99.2946	1.82519e+06		7	32.4286	115	1.85398	202.277	102.48	1.2312e+06
10	21.8	99	1.53251	182.041	99.3852	1.83088e+06		7	32.4286	115	1.85431	202.153	102.604	1.22391e+06
10	21.8	99	1.53231	181.863	99.5901	1.83783e+06		7	32.4286	115	1.85537	202.462	102.397	1.21132e+06
10	21.8	99	1.53264	182.009	99.2223	1.8032e+06		7	32.4286	115	1.85619	202.524	102.465	1.20954e+06
10	21.8	99	1.53263	181.894	99.201	1.82251e+06		7	32.4286	115	1.85477	202.615	102.482	1.20566e+06
10	21.8	99	1.53253	181.872	99.2345	1.82445e+06		7	32.4286	115	1.85474	202.555	102.476	1.20242e+06
10	21.8	99	1.53258	181.915	99.1315	1.82792e+06		7	32.4286	115	1.85494	202.544	102.385	1.21237e+06
10	21.8	99	1.5327	181.809	99.3175	1.83504e+06		7	32.4286	115	1.85515	202.571	102.429	1.22019e+06
10	21.8	99	1.53282	182.214	98.8604	1.81712e+06		7	32.4286	115	1.85523	202.448	102.467	1.21933e+06
10	21.8	99	1.53252	182.164	98.86	1.82221e+06		7	32.4286	115	1.85639	202.077	102.569	1.22387e+06
10	21.8	99	1.5328	182.205	98.8152	1.79638e+06		7	32.4286	115	1.85619	202.37	102.642	1.24087e+06
10	21.8	99	1.53294	182.301	98.7665	1.81095e+06		7	32.4286	115	1.85676	202.404	102.645	1.21799e+06
10	21.8	99	1.53286	182.019	99.1054	1.83752e+06		7	32.4286	115	1.85656	202.331	102.65	1.22658e+06
10	21.8	99	1.53307	182.015	98.9828	1.83867e+06		7	32.4286	115	1.85645	202.387	102.628	1.23893e+06
10	21.8	99	1.5331	181.947	99.0651	1.85816e+06		7	32.4286	115	1.8572	202.469	102.778	1.24259e+06
10	21.8	99	1.53359	182.034	99.0858	1.84693e+06		7	32.4286	115	1.85741	202.441	102.796	1.23784e+06
10	21.8	99	1.53333	182.226	99.0729	1.82825e+06		7	32.4286	115	1.85717	202.801	102.698	1.23321e+06
10	21.8	99	1.53328	182.387	98.8598	1.82242e+06		7	32.4286	115	1.85638	202.772	102.846	1.2158e+06
10	21.8	99	1.5334	181.979	99.2785	1.82984e+06		7	32.4286	115	1.85656	202.672	102.863	1.2378e+06
10	21.8	99	1.53328	181.859	99.5121	1.83521e+06		7	32.4286	115	1.85608	202.687	102.834	1.23966e+06
10	21.8	99	1.53345	181.988	99.4097	1.83712e+06		7	32.4286	115	1.85624	202.554	102.871	1.23704e+06
10	21.8	99	1.53373	181.915	99.5169	1.84659e+06		7	32.4286	115	1.85598	202.592	102.868	1.23246e+06
10	21.8	99	1.53364	181.857	99.5357	1.84218e+06		7	32.4286	115	1.85671	202.727	102.867	1.23799e+06
10	21.8	99	1.53388	181.95	99.3779	1.83877e+06		7	32.4286	115	1.85647	202.725	102.862	1.24435e+06
10	21.8	99	1.5338	182.038	99.2476	1.8329e+06		7	32.4286	115	1.85693	202.904	102.849	1.23739e+06
10	21.8	99	1.53368	182.266	98.9949	1.81786e+06		7	32.4286	115	1.8567	202.96	102.853	1.22228e+06
10	21.8	99	1.53375	182.057	99.2269	1.82791e+06		7	32.4286	115	1.85791	203.02	102.856	1.20967e+06
10	21.8	99	1.53327	181.947	99.1748	1.83547e+06		7	32.4286	115	1.85769	203.015	102.851	1.2202e+06
10	21.8	99	1.53297	182.015	99.098	1.83956e+06		7	32.4286	115	1.8581	202.995	102.844	1.20997e+06
10	21.8	99	1.53304	182.145	98.998	1.83681e+06		7	32.4286	115	1.85822	203.173	102.804	1.22043e+06
10	21.8	99	1.53307	181.996	99.2362	1.82724e+06		7	32.4286	115	1.85834	203.189	102.773	1.22058e+06
10	21.8	99	1.53297	182.183	99.0426	1.81986e+06		7	32.4286	115	1.85799	203.203	102.796	1.22558e+06
10	21.8	99	1.53291	182.064	99.1338	1.81383e+06		7	32.4286	115	1.85759	203.133	102.792	1.21608e+06
10	21.8	99	1.53326	182.186	98.9831	1.81624e+06		7	32.4286	115	1.85751	202.734	103.028	1.22935e+06
10	21.8	99	1.53342	181.698	99.4444	1.84014e+06		7	32.4286	115	1.85742	202.873	103.075	1.23936e+06
10	21.8	99	1.53316	181.852	99.2706	1.83218e+06		7	32.4286	115	1.85763	202.875	103.015	1.23894e+06
10	21.8	99	1.53342	181.916	99.1991	1.82736e+06		7	32.4286	115	1.85789	202.753	103.06	1.24142e+06
10	21.8	99	1.53369	182.003	99.1295	1.82655e+06		7	32.4286	115	1.85805	202.585	103.066	1.22808e+06
10	21.8	99	1.5333	182.011	99.0514	1.82626e+06		7	32.4286	115	1.85745	202.329	103.143	1.2513e+06
10	21.8	99	1.53364	182.028	99.0633	1.82176e+06		7	32.4286	115	1.85756	202.764	103.037	1.21003e+06
10	21.8	99	1.53336	182.183	98.979	1.80967e+06		7	32.4286	115	1.85737	202.659	103.154	1.21656e+06
10	21.8	99	1.53319	181.996	99.1337	1.82298e+06		7	32.4286	115	1.8571	202.495	103.093	1.22899e+06
10	21.8	99	1.53328	181.569	99.7463	1.84592e+06		7	32.4286	115	1.85702	202.664	102.969	1.2261e+06
10	21.8	99	1.53354	181.514	99.9004	1.85421e+06		7	32.4286	115	1.85736	202.742	102.856	1.22188e+06
10	21.8	99	1.53342	181.539	99.9265	1.85197e+06		7	32.4286	115	1.85723	202.651	102.838	1.25365e+06
10	21.8	99	1.53361	181.406	100.034	1.85412e+06		7	32.4286	115	1.85775	202.768	102.818	1.25345e+06
10	21.8	99	1.53353	181.376	100.071	1.85652e+06		7	32.4286	115	1.85794	202.973	102.779	1.24764e+06
10	21.8	99	1.53342	181.373	100.084	1.86011e+06		7	32.4286	115	1.85836	202.91	102.736	1.24881e+06
9	24.4444	100	1.56762	200.906	79.1913	1.50233e+06		10	22.5	121	1.92121	188.471	114.644	2.00259e+06
9	24.4444	100	1.56775	200.81	79.1819	1.49674e+06		10	22.5	121	1.92213	188.727	114.583	1.99214e+06
9	24.4444	100	1.56813	201.193	79.0398	1.49967e+06		10	22.5	121	1.9215	188.757	114.509	2.00175e+06
9	24.4444	100	1.56758	201.19	79.0526	1.51256e+06		10	22.5	121	1.9218	188.584	114.738	2.00509e+06
9	24.4444	100	1.56785	201.202	79.0794	1.48187e+06		10	22.5	121	1.9215	188.8	114.67	2.00249e+06
9	24.4444	100	1.56802	201.684	78.8925	1.4751e+06		10	22.5	121	1.92181	188.605	114.694	2.00401e+06
9	24.4444	100	1.56778	201.642	78.9026	1.47372e+06		10	22.5	121	1.922	188.443	114.731	2.00227e+06
9	24.4444	100	1.5674	201.384	79.0177	1.47428e+06		10	22.5	121	1.92302	188.407	114.715	2.0042e+06
9	24.4444	100	1.56733	201.3	79.0492	1.48578e+06		10	22.5	121	1.92285	188.242	114.879	1.97737e+06
9	24.4444	100	1.56788	201.489	79.027	1.4724e+06		10	22.5	121	1.92334	188.482	114.731	1.99026e+06
9	24.4444	100	1.56792	201.038	79.1479	1.48694e+06		10	22.5	121	1.92334	188.344	114.738	2.00217e+06
9	24.4444	100	1.56826	201.243	79.0862	1.52518e+06		10	22.5	121	1.92286	188.565	114.677	2.02204e+06
9	24.4444	100	1.5678	201.017	79.136	1.53941e+06		10	22.5	121	1.92229	188.446	114.698	2.016e+06
9	24.4444	100	1.56731	201.16	79.1453	1.53106e+06		10	22.5	121	1.92243	188.955	114.523	2.01123e+06
9	24.4444	100	1.56724	200.963	79.2556	1.5329e+06		10	22.5	121	1.92269	188.56	114.643	2.01763e+06
9	24.4444	100	1.56741	201.305	79.1132	1.48529e+06		10	22.5	121	1.9224	188.307	114.751	2.01734e+06
9	24.4444	100	1.56766	201.018	79.1487	1.54796e+06		10	22.5	121	1.92271	188.006	114.868	2.02566e+06
9	24.4444	100	1.56775	200.972	79.1904	1.52712e+06		10	22.5	121	1.92286	188.026	114.812	2.02544e+06
9	24.4444	100	1.56811	201.189	79.0995	1.53615e+06		10	22.5	121	1.92274	188.143	114.892	1.99933e+06
9	24.4444	100	1.56834	201.285	79.0768	1.52798e+06		10	22.5	121	1.92255	188.093	114.92	2.00319e+06
9	24.4444	100	1.56812	201.187	79.1272	1.52875e+06		10	22.5	121	1.9211	187.676	115.306	2.00284e+06
9	24.4444	100	1.5685	201.041	79.1572	1.54272e+06		10	22.5	121	1.92072	187.823	115.24	1.99694e+06
9	24.4444	100	1.56844	201.325	79.0178	1.53479e+06		10	22.5	121	1.92047	187.998	115.238	1.99601e+06
9	24.4444	100	1.56854	201.595	78.902	1.55076e+06		10	22.5	121	1.92064	187.475	115.395	2.00208e+06
9	24.4444	100	1.56887	201.586	78.9127	1.52955e+06		10	22.5	121	1.92078	187.427	115.384	2.00732e+06
9	24.4444	100	1.56865	201.106	79.1125	1.54203e+06		10	22.5	121	1.92189	187.753	115.249	2.00397e+06
9	24.4444	100	1.56874	201.308	79.0357	1.54152e+06		10	22.5	121	1.92212	187.618	115.32	2.00583e+06
9	24.4444	100	1.56819	201.114	79.0593	1.55382e+06		10	22.5	121	1.92252	188.298	115.101	1.99916e+06
9	24.4444	100	1.56874	201.442	79.0051	1.53219e+06		10	22.5	121	1.92211	188.3	114.981	2.00303e+06
9	24.4444	100	1.56919	201.008	79.1549	1.53236e+06		10	22.5	121	1.92235	188.297	114.887	2.02531e+06
9	24.4444	100	1.56866	201.215	79.0935	1.4873e+06		10	22.5	121	1.92258	188.429	114.793	1.99662e+06
9	24.4444	100	1.56904	201.589	78.9477	1.49347e+06		10	22.5	121	1.92248	188.422	114.783	2.01384e+06
9	24.4444	100	1.56974	201.356	79.0258	1.48159e+06		10	22.5	121	1.92231	188.582	114.691	2.00823e+06
9	24.4444	100	1.57007	201.364	79.0152	1.49308e+06		10	22.5	121	1.92218	188.986	114.477	1.98938e+06
9	24.4444	100	1.56964	201.454	78.9853	1.50547e+06		10	22.5	121	1.92265	188.627	114.592	1.97317e+06
9	24.4444	100	1.56986	201.35	79.0226	1.51738e+06		10	22.5	121	1.92238	188.679	114.607	2.00469e+06
9	24.4444	100	1.56943	201.919	78.8186	1.50993e+06		10	22.5	121	1.92266	188.183	114.847	1.99111e+06
9	24.4444	100	1.56926	201.755	78.8339	1.62311e+06		10	22.5	121	1.92269	187.801	115.002	1.98751e+06
9	24.4444	100	1.56931	201.623	78.8975	1.52378e+06		10	22.6	121	1.92195	187.851	114.962	1.99388e+06
9	24.4444	100	1.56954	201.708	78.8523	1.53871e+06		10	22.5	121	1.92248	188.116	114.891	1.99525e+06
9	24.4444	100	1.5699	202.072	78.7493	1.52232e+06		10	22.5	121	1.92331	188.277	114.777	1.99086e+06
9	24.4444	100	1.57033	201.923	78.8437	1.5011e+06		10	22.5	121	1.92331	188.277	114.777	1.99086e+06
9	24.4444	100	1.57034	202.086	78.7612	1.50447e+06		10	22.5	121	1.92327	188.479	114.705	1.98751e+06
9	24.4444	100	1.57066	201.942	78.7858	1.52998e+06		10	22.6	121	1.92265	188.454	114.774	1.97291e+06
9	24.4444	100	1.57091	201.999	78.7457	1.60027e+06		10	22.6	121	1.92357	188.417	114.903	1.98431e+06
9	24.4444	100	1.571	201.82	78.8385	1.53043e+06		10	22.6	121	1.92359	188.441	114.905	1.98142e+06
9	24.4444	100	1.57153	202.468	78.601	1.58196e+06		10	22.6	121	1.92368	188.528	115.03	1.98121e+06
9	24.4444	100	1.57119	202.297	78.6756	1.49596e+06		10	22.6	121	1.92376	188.584	114.901	1.97951e+06
9	24.4444	100	1.57107	202.319	78.6941	1.49578e+06		10	22.6	121	1.92365	188.58	114.941	1.97762e+06
9	24.4444	100	1.57104	202.356	78.6924	1.50556e+06		10	22.6	121	1.9243	188.224	115.154	1.97094e+06
9	24.4444	100	1.57085	203.144	78.4544	1.47532e+06		10	22.6	121	1.92442	188.28	115.071	1.98372e+06
9	24.4444	100	1.57089	203.501	78.354	1.47761e+06		10	22.6	121	1.92445	188.065	115.284	1.98759e+06
8	27.5	118	1.57112	203.514	78.3954	1.46256e+06		10	22.6	121	1.92386	188.127	115.227	1.99933e+06
8	27.5	118	1.57107	203.699	78.3443	1.45725e+06		10	22.6	121	1.92477	188.139	115.233	1.99571e+06
8	27.5	118	1.57085	203.886	78.3157	1.45112e+06		10	22.6	121	1.92416	187.894	115.312	1.98798e+06
8	27.5	118	1.5705	203.126	78.5706	1.46821e+06		10	22.6	121	1.92433	188.011	115.328	2.00087e+06
8	27.5	118	1.57038	203.376	78.4971	1.47084e+06		10	22.6	121	1.9244	188.038	115.414	1.99243e+06
9	24.4444	100	1.57023	203.386	78.5035	1.46042e+06		10	22.6	121	1.92391	187.995	115.415	1.9922e+06
9	24.4444	100	1.57103	203.203	78.53	1.45634e+06		10	22.6	121	1.92434	187.837	115.502	2.00428e+06
9	24.4444	100	1.57092	202.896	78.6593	1.45987e+06		10	22.6	121	1.92504	187.732	115.622	1.98471e+06
9	24.4444	100	1.57126	202.842	78.6692	1.4648e+06		10	22.6	121	1.9251	188.169	115.212	2.00128e+06
9	24.4444	100	1.57107	202.408	78.8245	1.44654e+06		10	22.6	121	1.92529	188.502	115.001	2.00486e+06
9	24.4444	100	1.5714	202.556	78.758	1.48837e+06		10	22.5	121	1.92574	188.457	115.049	2.00891e+06
9	24.4444	100	1.57175	202.941	78.69	1.43254e+06		10	22.5	121	1.92581	188.208	115.125	2.01059e+06
8	27.5	118	1.57136	201.994	78.9419	1.44504e+06		10	22.5	121	1.92606	188.282	115.059	2.01224e+06
8	27.5	118	1.57127	201.457	79.0827	1.4744e+06		10	22.5	121	1.92619	188.194	115.09	2.01028e+06
8	27.5	118	1.57118	201.496	79.0671	1.47359e+06		10	22.5	121	1.9266	188.225	114.937	2.00861e+06
9	24.4444	100	1.5717	201.831	78.9699	1.47094e+06		10	22.5	121	1.92597	188.283	114.852	2.00834e+06
9	24.4444	100	1.57129	201.322	79.1339	1.49455e+06		10	22.5	121	1.92619	188.326	114.987	2.01157e+06
8	27.5	118	1.57165	201.747	78.9675	1.47357e+06		10	22.6	121	1.92646	188.422	114.979	2.00989e+06
9	24.4444	100	1.57125	201.43	79.055	1.49052e+06		10	22.6	121	1.92679	188.655	114.827	2.01408e+06
9	24.4444	100	1.57145	201.46	79.0988	1.45794e+06		10	22.6	121	1.92697	188.384	114.96	2.02923e+06
8	27.5	118	1.57171	201.26	79.128	1.49977e+06		10	22.6	121	1.92679	188.645	114.887	2.02527e+06
8	27.5	118	1.57144	201.084	79.2158	1.52016e+06		10	22.6	121	1.92678	188.667	114.899	2.00731e+06
8	27.5	118	1.57098	201.222	79.1917	1.51121e+06		10	22.5	121	1.92701	188.138	115.159	2.01449e+06
8	27.5	118	1.57079	201.747	79.0437	1.4806e+06		10	22.5	121	1.9256	188.319	115.054	2.00801e+06
8	27.5	118	1.57112	201.575	79.0424	1.50407e+06		10	22.5	121	1.92587	188.489	115.034	2.00735e+06
8	27.5	118	1.57132	201.658	79.0181	1.49128e+06		10	22.5	121	1.92481	188.496	115.098	1.98891e+06
8	27.5	118	1.57088	201.399	79.0629	1.48802e+06		10	22.5	121	1.92461	188.586	114.948	2.01633e+06
9	24.4444	100	1.5704	201.414	79.0667	1.48953e+06		10	22.5	121	1.92363	188.806	114.853	2.01526e+06
8	27.5	118	1.57051	201.611	79.0815	1.47318e+06		10	22.5	121	1.92307	188.653	114.826	1.99348e+06
8	27.5	118	1.57022	201.313	79.2216	1.49007e+06		10	22.5	121	1.92242	188.717	114.802	2.00388e+06
8	27.5	118	1.57024	201.411	79.2489	1.46112e+06		10	22.5	121	1.92291	188.575	114.843	1.99892e+06
8	27.5	118	1.57	201.376	79.2891	1.4608e+06		10	22.5	121	1.9226	188.861	114.812	1.99726e+06
8	27.5	118	1.56942	201.637	79.1546	1.4745e+06		10	22.5	121	1.92378	189.189	114.71	1.99104e+06
8	27.5	118	1.56963	201.846	79.1039	1.46286e+06		10	22.5	121	1.9239	188.915	114.76	1.99137e+06
8	27.5	118	1.56949	201.753	79.083	1.47108e+06		10	22.5	121	1.9235	188.742	114.723	1.98881e+06
8	27.5	118	1.56924	201.885	79.1087	1.47725e+06		10	22.6	121	1.92308	188.738	114.629	1.9865e+06
8	27.5	118	1.56897	202.184	79.0287	1.45694e+06		10	22.6	121	1.92242	188.669	114.597	2.00253e+06
8	27.5	118	1.56888	201.889	79.0816	1.4758e+06		10	22.6	121	1.92366	188.889	114.548	1.98449e+06
8	27.5	118	1.56876	202.039	78.9131	1.46943e+06		10	22.6	121	1.92336	189.159	114.447	1.98702e+06
8	27.5	118	1.56893	201.92	78.9566	1.50558e+06		10	22.6	121	1.92367	189.021	114.517	1.98273e+06
8	27.5	118	1.56882	201.424	79.0965	1.51638e+06		10	22.6	121	1.92424	188.886	114.601	1.99979e+06
8	27.5	118	1.56903	201.673	79.0281	1.51308e+06		10	22.6	121	1.92342	189.362	114.54	1.9952e+06
8	27.5	118	1.56883	201.886	78.9639	1.50131e+06		10	22.6	121	1.92365	189.418	114.466	2.00088e+06
8	27.5	118	1.56866	201.955	78.951	1.51248e+06		10	22.6	121	1.92376	189.897	114.333	1.98795e+06
8	27.5	118	1.56831	202.001	78.9344	1.52536e+06		10	22.6	121	1.92379	189.62	114.422	1.99447e+06
8	27.5	118	1.5681	201.857	78.9173	1.52588e+06		10	22.6	121	1.92264	189.433	114.551	1.99866e+06
8	27.5	118	1.5684	201.873	78.8927	1.59278e+06		10	22.6	121	1.9219	189.753	114.489	1.98831e+06
8	27.5	118	1.56897	201.403	79.0488	1.59633e+06		10	22.6	121	1.92139	189.711	114.508	1.98149e+06
15	14.4	42	1.4952	133.094	178.822	2.20773e+06		6	37.6667	107	1.92198	217.461	83.2185	1.38521e+06
15	14.4	42	1.49527	133.095	178.823	2.20498e+06		6	37.6667	107	1.9222	217.454	83.1594	1.4362e+06
15	14.4	42	1.4956	133.14	178.814	2.20579e+06		6	37.6667	107	1.92218	217.562	83.0982	1.36579e+06
15	14.4	42	1.49552	133.118	178.792	2.20877e+06		6	37.6667	107	1.92217	217.64	83.1232	1.3886e+06
15	14.4	42	1.49571	133.095	178.805	2.20725e+06		6	37.6667	107	1.92211	217.46	83.2266	1.38927e+06
15	14.4	42	1.4955	132.949	178.833	2.21225e+06		6	37.6667	107	1.922	217.557	83.1378	1.35482e+06
15	14.4	42	1.49521	132.798	178.845	2.21453e+06		6	37.6667	107	1.92178	217.463	83.2155	1.35691e+06
15	14.4	42	1.49531	132.919	178.865	2.21347e+06		6	37.6667	107	1.92198	217.386	83.3197	1.36507e+06
15	14.4	42	1.49556	133.022	178.876	2.21389e+06		6	37.6667	107	1.92173	217.172	83.5108	1.36779e+06
15	14.4	42	1.49558	133.034	178.817	2.21117e+06		6	37.6667	107	1.92121	216.914	83.6643	1.37195e+06
15	14.4	42	1.49591	133.11	178.834	2.2118e+06		6	37.6667	107	1.92162	217.021	83.6343	1.36897e+06
15	14.4	42	1.4956	133.062	178.849	2.21049e+06		6	37.6667	107	1.92274	217.081	83.7175	1.37885e+06
15	14.4	42	1.49602	133.148	178.775	2.21025e+06		6	37.6667	107	1.92391	217.585	83.502	1.37259e+06
15	14.4	42	1.49605	133.05	178.798	2.21319e+06		6	37.6667	107	1.92369	217.447	83.5532	1.37485e+06
15	14.4	42	1.49634	133.125	178.74	2.21112e+06		6	37.6667	107	1.92471	217.082	83.9272	1.38973e+06
15	14.4	42	1.49634	133.124	178.743	2.21207e+06		6	37.6667	107	1.92478	217.806	83.5725	1.35993e+06
15	14.4	42	1.49612	133.112	178.757	2.21279e+06		6	37.6667	107	1.92493	217.719	83.7238	1.3681e+06
15	14.4	42	1.49609	133.086	178.754	2.21463e+06		6	37.6667	107	1.9249	217.259	83.9425	1.38642e+06
15	14.4	42	1.49625	133.047	178.79	2.21586e+06		6	37.6667	107	1.9245	217.309	83.9648	1.36275e+06
15	14.4	42	1.49623	132.965	178.836	2.21818e+06		6	37.6667	107	1.9255	217.393	83.9852	1.36818e+06
15	14.4	42	1.4959	132.918	178.826	2.21751e+06		6	37.6667	107	1.92653	217.331	83.9701	1.36847e+06
15	14.4	42	1.49584	132.92	178.808	2.22231e+06		6	37.6667	107	1.92588	217.063	84.1892	1.36034e+06
15	14.4	42	1.49628	132.994	178.772	2.21926e+06		6	37.6667	107	1.92638	217.454	83.9146	1.37593e+06
15	14.4	42	1.49599	133.069	178.77	2.2194e+06		6	37.6667	107	1.92756	217.669	83.778	1.37259e+06
15	14.4	42	1.49629	133.131	178.76	2.21171e+06		6	37.6667	107	1.92766	217.578	83.7837	1.39904e+06
15	14.4	42	1.49618	133.079	178.782	2.20617e+06		6	37.6667	107	1.92671	217.251	84.2018	1.37191e+06
15	14.4	42	1.49584	133.042	178.795	2.21622e+06		6	37.6667	107	1.92545	217.293	84.3353	1.35071e+06
15	14.4	42	1.49561	132.996	178.75	2.2127e+06		6	37.6667	107	1.9257	217.428	84.119	1.36922e+06
15	14.4	42	1.49565	133.154	178.713	2.20901e+06		6	37.6667	107	1.92682	217.533	83.9348	1.35839e+06
15	14.4	42	1.49541	133.067	178.748	2.21471e+06		6	37.6667	107	1.92618	217.504	83.959	1.36156e+06
15	14.4	42	1.49568	133.058	178.778	2.21405e+06		6	37.6667	107	1.92447	217.155	83.9853	1.37176e+06
15	14.4	42	1.4958	133.095	178.754	2.21491e+06		6	37.6667	107	1.92491	217.588	83.8342	1.37349e+06
15	14.4	42	1.49534	132.962	178.813	2.21216e+06		6	37.6667	107	1.92482	217.811	83.7663	1.36322e+06
15	14.4	42	1.49581	133.018	178.82	2.20486e+06		6	37.6667	107	1.92412	218.098	83.8725	1.31428e+06
15	14.4	42	1.49593	133.105	178.807	2.20225e+06		6	37.6667	107	1.92327	217.757	83.8772	1.34897e+06
15	14.4	42	1.49627	133.044	178.756	2.20218e+06		6	37.6667	107	1.92282	217.916	83.8431	1.34384e+06
15	14.4	42	1.4958	133.054	178.815	2.20131e+06		6	37.6667	107	1.92371	218.097	83.7133	1.3472e+06
15	14.4	42	1.49602	133.102	178.762	2.21584e+06		6	37.6667	107	1.92379	218.432	83.4161	1.34731e+06
15	14.4	42	1.49564	133.126	178.783	2.2168e+06		6	37.6667	107	1.92478	218.422	83.4146	1.34609e+06
15	14.4	42	1.49542	133.126	178.789	2.21325e+06		6	37.6667	107	1.92393	218.46	83.3026	1.34116e+06
15	14.4	42	1.4956	133.059	178.732	2.21491e+06		6	37.6667	107	1.92384	218.402	83.4576	1.34134e+06
15	14.4	42	1.49536	133.129	178.791	2.20928e+06		6	37.6667	107	1.92386	218.267	83.4803	1.36997e+06
15	14.4	42	1.49524	133.157	178.814	2.20408e+06		6	37.6667	107	1.92327	218.578	83.4132	1.36336e+06
15	14.4	42	1.49493	132.952	178.854	2.21442e+06		6	37.6667	107	1.92368	218.548	83.4311	1.3622e+06
15	14.4	42	1.49482	133.063	178.847	2.21536e+06		6	37.6667	107	1.92404	218.47	83.509	1.33751e+06
15	14.4	42	1.49458	132.88	178.851	2.21419e+06		6	37.6667	107	1.925	218.717	83.4987	1.32571e+06
15	14.4	42	1.49513	132.85	178.866	2.22253e+06		6	37.6667	107	1.92421	218.38	83.6623	1.3271e+06
15	14.4	42	1.49501	132.822	178.851	2.22534e+06		6	37.6667	107	1.92472	218.664	83.5282	1.31473e+06
15	14.4	42	1.495	132.898	178.842	2.22533e+06		6	37.6667	107	1.92435	218.561	83.5834	1.31668e+06
15	14.4	42	1.49478	132.851	178.781	2.22432e+06		6	37.6667	107	1.92427	218.337	83.7776	1.3248e+06
15	14.4	42	1.49491	132.917	178.852	2.22185e+06		6	37.6667	107	1.92452	218.749	83.6458	1.28203e+06
15	14.4	42	1.49471	132.875	178.844	2.22117e+06		6	37.6667	107	1.92413	218.497	83.7991	1.2801e+06
15	14.4	42	1.49514	132.928	178.841	2.21765e+06		6	37.6667	107	1.92384	218.21	83.9952	1.30858e+06
15	14.4	42	1.49524	132.928	178.857	2.2191e+06		6	37.6667	107	1.92459	218.192	83.9038	1.32466e+06
15	14.4	42	1.49502	132.908	178.864	2.20232e+06		6	37.6667	107	1.92546	218.552	83.8027	1.25628e+06
15	14.4	42	1.49534	132.959	178.794	2.2216e+06		6	37.6667	107	1.92467	218.659	83.73	1.2207e+06
15	14.4	42	1.49527	132.933	178.799	2.21907e+06		6	37.6667	107	1.92476	218.661	83.6775	1.22028e+06
15	14.4	42	1.49526	132.823	178.856	2.20317e+06		6	37.6667	107	1.92596	219.501	83.0995	1.20139e+06
15	14.4	42	1.49578	132.949	178.838	2.21718e+06		6	37.6667	107	1.92557	219.249	83.156	1.20013e+06
15	14.4	42	1.49587	132.949	178.8	2.19955e+06		6	37.6667	107	1.92439	219.099	83.301	1.19022e+06
15	14.4	42	1.49577	132.989	178.789	2.19934e+06		6	37.6667	107	1.92576	219.465	83.0621	1.22004e+06
15	14.4	42	1.49581	132.948	178.772	2.20065e+06		6	37.6667	107	1.92525	219.169	83.3266	1.26447e+06
15	14.4	42	1.49568	132.869	178.786	2.21766e+06		6	37.6667	107	1.92517	218.636	83.5899	1.26877e+06
15	14.4	42	1.49525	132.821	178.765	2.1974e+06		6	37.6667	107	1.92516	218.139	84.0003	1.26683e+06
15	14.4	42	1.49491	132.814	178.757	2.19212e+06		6	37.6667	107	1.92486	218.291	83.9136	1.29628e+06
15	14.4	42	1.49549	132.865	178.689	2.18409e+06		6	37.6667	107	1.92466	218.207	83.8753	1.26917e+06
15	14.4	42	1.49524	132.837	178.71	2.17703e+06		6	37.6667	107	1.92401	218.145	83.8537	1.32056e+06
15	14.4	42	1.49497	132.798	178.693	2.17941e+06		6	37.6667	107	1.92358	217.894	84.0363	1.31239e+06
15	14.4	42	1.49519	132.816	178.721	2.17966e+06		6	37.6667	107	1.92376	217.688	83.9833	1.33235e+06
15	14.4	42	1.49535	132.837	178.707	2.18402e+06		6	37.6667	107	1.92452	217.952	83.8405	1.35179e+06
15	14.4	42	1.49496	132.801	178.736	2.18575e+06		6	37.6667	107	1.92488	217.819	83.8711	1.30741e+06
15	14.4	42	1.49477	132.834	178.736	2.18632e+06		6	37.6667	107	1.92569	218.226	83.7275	1.23923e+06
15	14.4	42	1.49512	132.859	178.733	2.18406e+06		6	37.6667	107	1.92581	218.126	83.7993	1.24167e+06
15	14.4	42	1.49548	132.871	178.785	2.18247e+06		6	37.6667	107	1.92432	218.114	83.91	1.20224e+06
15	14.4	42	1.49545	132.817	178.875	2.18276e+06		6	37.6667	107	1.92613	219.297	83.055	1.16013e+06
15	14.4	42	1.49534	132.868	178.868	2.18243e+06		6	37.6667	107	1.92783	220.164	82.5597	1.1458e+06
15	14.4	42	1.49512	132.877	178.862	2.1808e+06		6	37.6667	107	1.92692	219.851	82.6704	1.15479e+06
15	14.4	42	1.49521	132.816	178.842	2.18353e+06		6	37.6667	107	1.92733	219.331	82.8714	1.18605e+06
15	14.4	42	1.49547	132.91	178.812	2.1813e+06		6	37.6667	107	1.9274	219.404	82.7701	1.2144e+06
15	14.4	42	1.49491	132.829	178.803	2.18288e+06		6	37.6667	107	1.92805	220.243	82.2082	1.16564e+06
15	14.4	42	1.49448	132.856	178.825	2.18439e+06		6	37.6667	107	1.92721	219.747	82.5026	1.15537e+06
15	14.4	42	1.49492	132.92	178.791	2.18011e+06		6	37.6667	107	1.92772	220.19	82.2188	1.15526e+06
15	14.4	42	1.49516	132.835	178.885	2.1954e+06		6	37.6667	107	1.92701	220.914	81.6704	1.14424e+06
15	14.4	42	1.49537	132.864	178.847	2.15984e+06		6	37.6667	107	1.92792	220.945	81.5824	1.14936e+06
15	14.4	42	1.49551	132.863	178.898	2.17635e+06		6	37.6667	107	1.92817	220.259	82.0028	1.16349e+06
15	14.4	42	1.4953	132.871	178.826	2.18487e+06		6	37.6667	107	1.9276	221.269	81.1555	1.14223e+06
15	14.4	42	1.49523	132.85	178.827	2.1835e+06		6	37.6667	107	1.92849	221.35	81.2655	1.14027e+06
15	14.4	42	1.49525	132.884	178.846	2.18507e+06		6	37.6667	107	1.9272	219.674	82.5702	1.17586e+06
15	14.4	42	1.49552	132.914	178.817	2.17269e+06		6	37.6667	107	1.9293	220.747	81.8319	1.13955e+06
15	14.4	42	1.49521	132.802	178.851	2.17986e+06		6	37.6667	107	1.92877	220.699	82.1926	1.14673e+06
15	14.4	42	1.49575	132.893	178.83	2.18157e+06		6	37.6667	107	1.92813	220.842	82.1606	1.15059e+06
15	14.4	42	1.49584	132.91	178.741	2.18076e+06		6	37.6667	107	1.92787	221.083	81.9443	1.15146e+06
15	14.4	42	1.4959	132.95	178.762	2.19559e+06		6	37.6667	107	1.92819	221.033	81.9655	1.15685e+06
15	14.4	42	1.49609	132.925	178.795	2.19809e+06		6	37.6667	107	1.92834	220.927	82.0181	1.16359e+06
15	14.4	42	1.49599	132.909	178.775	2.20215e+06		6	37.6667	107	1.92857	220.884	82.0289	1.17098e+06
15	14.4	42	1.49614	132.898	178.804	2.19983e+06		6	37.6667	107	1.92789	221.235	81.8187	1.15446e+06
15	14.4	42	1.49598	132.879	178.819	2.18272e+06		6	37.6667	107	1.92839	221.543	81.6142	1.14799e+06
15	14.4	42	1.49629	132.865	178.826	2.17968e+06		6	37.6667	107	1.92853	221.954	81.2203	1.13398e+06
15	14.4	42	1.49637	132.85	178.857	2.17903e+06		6	37.6667	107	1.92983	221.845	81.2149	1.15895e+06
15	14.4	42	1.49647	132.873	178.858	2.18073e+06		6	37.6667	107	1.92859	222.526	80.683	1.13972e+06
14	15.4286	42	1.58248	157.108	127.917	2.86623e+06		9	25.1111	122	1.80376	174.979	141	1.00946e+06
14	15.4286	42	1.58235	157.125	127.893	2.92852e+06		9	25.1111	122	1.80453	175.209	140.687	1.01112e+06
14	15.4286	42	1.58261	157.173	127.825	2.97904e+06		9	25.1111	122	1.80402	175.414	140.049	1.01946e+06
14	15.4286	42	1.58215	157.115	127.725	2.97387e+06		9	25.1111	122	1.80298	175.115	140.056	1.02646e+06
14	15.4286	42	1.58154	157.015	127.723	3.02514e+06		9	25.1111	122	1.80346	175.362	140.195	1.00881e+06
14	15.4286	42	1.58224	157.094	127.715	3.0068e+06		9	25.1111	122	1.80274	175.427	140.119	1.01384e+06
14	15.4286	42	1.58185	157.02	127.85	2.96951e+06		9	25.1111	122	1.80303	175.404	140.127	1.00991e+06
14	15.4286	42	1.58182	157.022	127.806	3.02113e+06		9	25.1111	122	1.80335	175.332	140.425	1.01079e+06
14	15.4286	42	1.5814	156.93	127.836	3.02587e+06		9	25.1111	122	1.80265	175.284	140.241	1.01535e+06
13	16.6154	73	1.5813	157.103	127.833	2.96672e+06		9	25.1111	122	1.80214	175.441	140.286	1.00734e+06
14	15.4286	42	1.58114	157.085	127.805	2.98827e+06		9	25.1111	122	1.80246	175.235	140.253	1.00577e+06
13	16.6154	73	1.58053	157.047	127.788	3.01363e+06		9	25.1111	122	1.80305	175.191	140.206	1.00652e+06
14	15.4286	42	1.58071	157.12	127.697	2.99508e+06		9	25.1111	122	1.80296	175.188	140.323	1.01884e+06
14	15.4286	42	1.58137	157.053	127.658	2.99777e+06		9	25.1111	122	1.80259	175.105	140.953	1.00773e+06
14	15.4286	42	1.58142	157.025	127.824	2.97097e+06		9	25.1111	122	1.80345	175.143	140.59	1.00867e+06
14	15.4286	42	1.58188	156.967	127.941	2.97219e+06		9	25.1111	122	1.80371	175.138	140.492	1.01102e+06
13	16.6154	73	1.58181	157.02	127.757	3.01088e+06		9	25.1111	122	1.80341	175.046	140.71	1.00365e+06
13	16.6154	73	1.58182	157.079	127.753	3.01248e+06		9	25.1111	122	1.8035	175.05	141.069	1.00307e+06
13	16.6154	73	1.58082	156.741	127.971	2.97761e+06		9	25.1111	122	1.80289	175.131	141.064	1.01036e+06
14	15.4286	42	1.58152	156.805	127.976	3.00263e+06		9	25.1111	122	1.80343	175.225	141.427	1.00356e+06
14	15.4286	42	1.58142	157.108	127.847	2.97502e+06		9	25.1111	122	1.80257	175.1	141.268	1.00694e+06
14	15.4286	42	1.58147	157.057	127.88	2.96543e+06		9	25.1111	122	1.80292	175.117	140.765	1.0135e+06
13	16.6154	73	1.58207	157.311	127.804	2.97768e+06		9	25.1111	122	1.80326	174.953	140.742	1.00877e+06
13	16.6154	73	1.58179	157.409	127.647	2.97365e+06		9	25.1111	122	1.80442	174.829	141.438	1.0102e+06
13	16.6154	73	1.58208	157.194	127.77	2.99241e+06		9	25.1111	122	1.80366	174.802	141.521	1.00956e+06
13	16.6154	73	1.58227	157.366	127.727	2.97586e+06		9	25.1111	122	1.80331	174.799	141.707	1.0296e+06
13	16.6154	73	1.58252	157.237	127.707	2.98843e+06		9	25.1111	122	1.80365	174.553	141.917	1.02878e+06
13	16.6154	73	1.58233	157.195	127.734	2.98986e+06		9	25.1111	122	1.80335	174.636	141.825	1.02691e+06
14	15.4286	42	1.58246	157.052	127.727	3.00377e+06		9	25.1111	122	1.80354	174.713	141.677	1.02741e+06
14	15.4286	42	1.58262	157.113	127.672	2.98577e+06		9	25.1111	122	1.80348	174.698	141.294	1.03706e+06
14	15.4286	42	1.58249	156.952	127.717	3.00775e+06		9	25.1111	122	1.80282	174.51	141.833	1.04092e+06
13	16.6154	73	1.58267	157.027	127.716	2.97533e+06		9	25.1111	122	1.80236	174.448	141.951	1.02772e+06
14	15.4286	42	1.58323	156.991	127.686	2.99997e+06		9	25.1111	122	1.80282	174.547	142.223	1.04178e+06
14	15.4286	42	1.58343	156.939	127.801	2.99094e+06		9	25.1111	122	1.80202	174.596	142.187	1.03215e+06
13	16.6154	73	1.58255	156.985	127.747	3.00886e+06		9	25.1111	122	1.80058	174.462	142.041	1.05376e+06
13	16.6154	73	1.58255	156.985	127.747	3.00886e+06		9	25.1111	122	1.80144	174.544	142.255	1.03274e+06
13	16.6154	73	1.58301	157.128	127.692	3.01475e+06		9	25.1111	122	1.80154	174.604	142.158	1.03988e+06
13	16.6154	73	1.5834	157.135	127.7	3.01568e+06		9	25.1111	122	1.80244	174.685	142.053	1.03565e+06
13	16.6154	73	1.58351	157.148	127.617	3.02815e+06		9	25.1111	122	1.80192	174.527	141.948	1.03717e+06
13	16.6154	73	1.58368	157.05	127.699	3.03654e+06		9	25.1111	122	1.80166	174.495	141.867	1.04029e+06
13	16.6154	73	1.5832	156.984	127.824	3.03294e+06		9	25.1111	122	1.80141	174.623	141.538	1.03926e+06
13	16.6154	73	1.58247	157.01	127.756	3.01355e+06		9	25.1111	122	1.80123	174.594	141.476	1.04005e+06
14	15.4286	42	1.58274	157.116	127.845	2.97127e+06		9	25.1111	122	1.80091	174.262	141.651	1.05413e+06
14	15.4286	42	1.58314	157.099	127.904	2.99657e+06		9	25.1111	122	1.80103	173.973	142.098	1.05306e+06
14	15.4286	42	1.58336	157.071	127.899	2.99549e+06		9	25.1111	122	1.79998	173.84	142.275	1.08711e+06
14	15.4286	42	1.58323	157.167	127.858	2.98485e+06		9	25.1111	122	1.80067	174.007	142.265	1.08707e+06
14	15.4286	42	1.58279	157.248	127.823	2.98904e+06		9	25.1111	122	1.80144	174.09	142.241	1.08917e+06
14	15.4286	42	1.58205	157.173	127.888	3.00111e+06		9	25.1111	122	1.80138	174.058	142.019	1.09868e+06
14	15.4286	42	1.5817	157.186	127.923	2.96431e+06		9	25.1111	122	1.80174	174.355	141.829	1.11727e+06
14	15.4286	42	1.58093	157.194	127.991	2.96785e+06		9	25.1111	122	1.80186	174.319	142.019	1.09705e+06
14	15.4286	42	1.58056	157.102	128.029	2.97062e+06		9	25.1111	122	1.80145	174.337	142.085	1.09317e+06
14	15.4286	42	1.58065	157.154	128.003	2.97314e+06		9	25.1111	122	1.80176	174.277	141.709	1.07607e+06
14	15.4286	42	1.58077	156.945	128.182	3.00227e+06		9	25.1111	122	1.80144	174.319	141.737	1.08901e+06
14	15.4286	42	1.5809	157.053	128.13	3.00066e+06		9	25.1111	122	1.80219	174.343	142.013	1.09134e+06
14	15.4286	42	1.58089	157.094	128.113	2.98554e+06		9	25.1111	122	1.80202	174.367	141.781	1.0852e+06
14	15.4286	42	1.58126	157.197	128.02	2.97863e+06		9	25.1111	122	1.80176	174.492	141.58	1.20603e+06
14	15.4286	42	1.58085	157.162	128.018	3.02432e+06		9	25.1111	122	1.8017	174.179	141.725	1.09564e+06
14	15.4286	42	1.58117	157.146	127.998	2.98245e+06		9	25.1111	122	1.80125	174.147	141.76	1.07566e+06
14	15.4286	42	1.58093	157.072	128.006	3.05041e+06		9	25.1111	122	1.80146	174.414	141.531	1.07286e+06
14	15.4286	42	1.58138	157.092	128.004	3.04351e+06		9	25.1111	122	1.80168	174.37	141.465	1.07343e+06
14	15.4286	42	1.58224	157.014	128.089	3.0325e+06		9	25.1111	122	1.80098	174.586	141.413	1.08418e+06
14	15.4286	42	1.5828	156.908	128.058	3.04471e+06		9	25.1111	122	1.80063	174.451	141.708	1.09479e+06
14	15.4286	42	1.58172	156.94	128.006	3.03411e+06		9	25.1111	122	1.79988	174.403	141.375	1.12185e+06
14	15.4286	42	1.58117	156.858	128.054	3.04021e+06		9	25.1111	122	1.80065	174.235	142.229	1.10012e+06
14	15.4286	42	1.58138	156.944	127.964	2.9834e+06		9	25.1111	122	1.80014	174.133	142.103	1.11723e+06
14	15.4286	42	1.58142	156.916	128.042	2.98207e+06		9	25.1111	122	1.80051	173.935	142.086	1.11249e+06
14	15.4286	42	1.58162	156.898	128.092	2.98178e+06		9	25.1111	122	1.80025	174.055	141.871	1.10679e+06
14	15.4286	42	1.58145	156.994	128.036	2.97946e+06		9	25.1111	122	1.7987	173.849	142.003	1.10863e+06
14	15.4286	42	1.58147	157.069	127.946	2.97403e+06		9	25.1111	122	1.79935	174.02	141.759	1.10761e+06
14	15.4286	42	1.58094	157.009	127.958	2.97224e+06		9	25.1111	122	1.79835	173.81	141.694	1.11092e+06
14	15.4286	42	1.5817	156.95	127.974	2.95997e+06		9	25.1111	122	1.79851	173.9	141.614	1.10793e+06
14	15.4286	42	1.58124	156.907	127.988	2.95978e+06		9	25.1111	122	1.79877	173.838	141.678	1.11389e+06
14	15.4286	42	1.58144	156.979	128.116	2.95059e+06		9	25.1111	122	1.79763	173.771	141.515	1.09622e+06
14	15.4286	42	1.58116	156.871	128.211	2.98757e+06		9	25.1111	122	1.79772	174.072	141.26	1.09198e+06
14	15.4286	42	1.58095	156.795	128.352	2.96192e+06		9	25.1111	122	1.79796	174.152	141.078	1.06315e+06
14	15.4286	42	1.58083	156.811	128.454	2.97202e+06		9	25.1111	122	1.79681	173.944	141.408	1.09937e+06
14	15.4286	42	1.58125	156.712	128.458	2.98901e+06		9	25.1111	122	1.7972	173.895	141.58	1.10075e+06
14	15.4286	42	1.58107	156.792	128.436	2.9949e+06		9	25.1111	122	1.79738	173.974	141.32	1.08186e+06
13	16.6154	73	1.58102	156.954	128.352	2.98405e+06		9	25.1111	122	1.79785	173.97	141.655	1.08815e+06
13	16.6154	73	1.58145	156.851	128.42	2.98996e+06		9	25.1111	122	1.79888	174.364	142.1	1.09173e+06
13	16.6154	73	1.58111	156.784	128.43	2.97851e+06		9	25.1111	122	1.79845	174.558	141.435	1.10674e+06
14	15.4286	42	1.5812	156.9	128.33	2.99215e+06		9	25.1111	122	1.79919	174.469	141.344	1.09341e+06
14	15.4286	42	1.58091	156.901	128.254	2.9937e+06		9	25.1111	122	1.79976	174.39	141.295	1.08796e+06
14	15.4286	42	1.58119	156.99	128.248	2.97636e+06		9	25.1111	122	1.7996	174.49	141.209	1.08555e+06
14	15.4286	42	1.58136	157.067	128.252	2.99114e+06		9	25.1111	122	1.79986	174.527	141.223	1.10017e+06
14	15.4286	42	1.58117	157.057	128.209	2.98456e+06		9	25.1111	122	1.80004	174.582	141.063	1.21998e+06
14	15.4286	42	1.58124	157.062	128.244	2.98811e+06		9	25.1111	122	1.79906	174.531	140.784	1.19526e+06
14	15.4286	42	1.58112	157.078	128.257	2.98555e+06		9	25.1111	122	1.79987	174.677	140.869	1.21065e+06
14	15.4286	42	1.58042	156.96	128.285	2.98789e+06		9	25.1111	122	1.79893	174.705	140.8	1.19336e+06
14	15.4286	42	1.58026	156.845	128.329	2.98814e+06		9	25.1111	122	1.79838	174.696	140.808	1.19204e+06
14	15.4286	42	1.58051	156.869	128.353	2.99973e+06		9	25.1111	122	1.79894	174.81	140.965	1.04722e+06
14	15.4286	42	1.5806	156.773	128.436	3.0072e+06		9	25.1111	122	1.79853	174.796	140.899	1.05361e+06
14	15.4286	42	1.58111	156.938	128.313	2.92925e+06		9	25.1111	122	1.799	174.775	140.892	1.02767e+06
13	16.6154	73	1.58079	156.795	128.402	2.95764e+06		9	25.1111	122	1.79912	174.55	141.152	1.1449e+06
14	15.4286	42	1.58071	156.825	128.367	2.98887e+06		9	25.1111	122	1.80036	174.65	141	1.04004e+06
13	16.6154	73	1.58149	156.927	128.393	2.98968e+06		9	25.1111	122	1.8005	174.8	140.788	1.1503e+06
14	15.4286	42	1.5812	156.868	128.427	2.98968e+06		9	25.1111	122	1.80075	174.845	141.034	1.02524e+06
14	15.4286	42	1.58081	156.761	128.487	2.99398e+06		9	25.1111	122	1.8006	174.645	141.584	1.04337e+06
13	16.6154	73	1.58066	156.89	128.331	2.96531e+06		9	25.1111	122	1.8004	174.702	141.471	1.04087e+06
14	15.4286	42	1.58046	156.766	128.454	2.97126e+06		9	25.1111	122	1.80028	174.668	141.171	1.03883e+06
13	16.6154	73	1.40259	129.794	198.265	487565		9	25.2222	91	1.72525	174.542	124.975	1.40586e+06
13	16.6154	73	1.40232	129.727	198.279	487632		9	25.2222	91	1.72555	174.501	124.978	1.40507e+06
13	16.6154	73	1.40243	129.717	198.258	487470		9	25.2222	91	1.72545	174.494	124.975	1.40684e+06
13	16.6154	73	1.4025	129.772	198.26	490338		9	25.2222	91	1.72544	174.513	124.969	1.40694e+06
13	16.6154	73	1.40252	129.729	198.167	488915		9	25.2222	91	1.72531	174.519	124.95	1.40689e+06
13	16.6154	73	1.4022	129.673	198.189	487434		9	25.2222	91	1.7252	174.543	124.949	1.40501e+06
13	16.6154	73	1.40212	129.686	198.178	489500		9	25.2222	91	1.72545	174.567	124.933	1.40428e+06
13	16.6154	73	1.40216	129.614	198.207	493102		9	25.2222	91	1.72608	174.572	124.927	1.40729e+06
13	16.6154	73	1.4021	129.611	198.161	489587		10	22.7	91	1.72605	174.56	124.937	1.40536e+06
13	16.6154	73	1.40175	129.611	198.128	491548		10	22.7	91	1.72598	174.555	124.935	1.4142e+06
13	16.6154	73	1.40192	129.626	198.116	489368		9	25.2222	91	1.72609	174.534	124.942	1.41113e+06
13	16.6154	73	1.40221	129.653	198.111	487430		9	25.2222	91	1.72611	174.528	124.945	1.40941e+06
13	16.6154	73	1.4023	129.632	198.111	488120		10	22.7	91	1.72595	174.489	124.954	1.41046e+06
13	16.6154	73	1.40188	129.585	198.153	489549		10	22.7	91	1.72611	174.511	124.944	1.4086e+06
13	16.6154	73	1.40225	129.603	198.17	492527		10	22.7	91	1.72596	174.485	124.958	1.41007e+06
13	16.6154	73	1.40211	129.574	198.103	494210		10	22.7	91	1.72564	174.464	124.97	1.4104e+06
13	16.6154	73	1.402	129.502	198.123	492686		10	22.7	91	1.72549	174.488	124.961	1.41344e+06
13	16.6154	73	1.40198	129.476	198.079	492038		9	25.2222	91	1.7253	174.512	124.952	1.41509e+06
13	16.6154	73	1.40226	129.553	198.071	491312		9	25.2222	91	1.72529	174.513	124.954	1.41552e+06
13	16.6154	73	1.40209	129.526	198.061	494880		9	25.2222	91	1.72521	174.573	124.921	1.41416e+06
13	16.6154	73	1.40211	129.543	198.085	485680		9	25.2222	91	1.72521	174.585	124.917	1.4116e+06
13	16.6154	73	1.40208	129.532	198.046	490939		9	25.2222	91	1.72531	174.589	124.921	1.41093e+06
13	16.6154	73	1.40204	129.572	198.074	494525		9	25.2222	91	1.72524	174.576	124.926	1.41155e+06
13	16.6154	73	1.40201	129.555	198.072	492689		9	25.2222	91	1.72528	174.558	124.937	1.41095e+06
13	16.6154	73	1.40217	129.517	198.051	489031		9	25.2222	91	1.72531	174.593	124.931	1.41244e+06
13	16.6154	73	1.40202	129.534	198.056	484452		9	25.2222	91	1.72529	174.609	124.927	1.40991e+06
13	16.6154	73	1.40184	129.483	198.072	484035		9	25.2222	91	1.72545	174.623	124.918	1.40795e+06
13	16.6154	73	1.40185	129.531	198.074	485412		9	25.2222	91	1.72519	174.624	124.92	1.40892e+06
13	16.6154	73	1.40204	129.542	198.069	481571		9	25.2222	91	1.72511	174.631	124.918	1.40892e+06
13	16.6154	73	1.40184	129.546	198.08	481748		9	25.2222	91	1.72533	174.636	124.91	1.40929e+06
13	16.6154	73	1.40192	129.542	198.092	484373		9	25.2222	91	1.72513	174.641	124.898	1.41639e+06
13	16.6154	73	1.40203	129.526	198.097	483705		9	25.2222	91	1.72488	174.627	124.9	1.41775e+06
13	16.6154	73	1.40198	129.516	198.104	486066		9	25.2222	91	1.72502	174.633	124.899	1.41702e+06
13	16.6154	73	1.4022	129.534	198.101	481430		9	25.2222	91	1.72479	174.622	124.904	1.41776e+06
13	16.6154	73	1.40219	129.501	198.153	484195		9	25.2222	91	1.72468	174.621	124.909	1.41741e+06
13	16.6154	73	1.40231	129.471	198.141	482563		9	25.2222	91	1.72467	174.578	124.928	1.41254e+06
13	16.6154	73	1.40251	129.502	198.187	481949		9	25.2222	91	1.72485	174.546	124.944	1.42249e+06
13	16.6154	73	1.40232	129.515	198.198	481656		9	25.2222	91	1.72503	174.532	124.939	1.42222e+06
13	16.6154	73	1.40236	129.557	198.284	483319		9	25.2222	91	1.72509	174.538	124.938	1.42067e+06
13	16.6154	73	1.40235	129.554	198.254	485827		9	25.2222	91	1.72531	174.549	124.925	1.42367e+06
13	16.6154	73	1.40233	129.561	198.26	481727		9	25.2222	91	1.72526	174.562	124.916	1.42449e+06
13	16.6154	73	1.40231	129.511	198.238	479681		9	25.2222	91	1.7251	174.557	124.927	1.42523e+06
13	16.6154	73	1.40236	129.518	198.25	487565		9	25.2222	91	1.72519	174.596	124.921	1.42563e+06
13	16.6154	73	1.40234	129.507	198.265	482822		9	25.2222	91	1.72506	174.578	124.914	1.42407e+06
13	16.6154	73	1.40216	129.51	198.237	481011		9	25.2222	91	1.72515	174.575	124.92	1.42419e+06
13	16.6154	73	1.40228	129.48	198.162	484942		9	25.2222	91	1.72534	174.584	124.918	1.42025e+06
13	16.6154	73	1.40229	129.421	198.181	480847		9	25.2222	91	1.7256	174.552	124.927	1.42134e+06
13	16.6154	73	1.40204	129.389	198.225	483131		9	25.2222	91	1.72551	174.606	124.931	1.42225e+06
13	16.6154	73	1.40195	129.437	198.223	483601		9	25.2222	91	1.72549	174.626	124.925	1.421e+06
13	16.6154	73	1.40214	129.436	198.271	485716		9	25.2222	91	1.72559	174.637	124.929	1.41907e+06
13	16.6154	73	1.40204	129.343	198.215	479771		9	25.2222	91	1.72577	174.681	124.914	1.41653e+06
13	16.6154	73	1.40193	129.416	198.202	483304		9	25.2222	91	1.72574	174.668	124.916	1.41784e+06
13	16.6154	73	1.40158	129.386	198.216	479583		9	25.2222	91	1.72571	174.65	124.906	1.41614e+06
13	16.6154	73	1.40159	129.387	198.226	478523		9	25.2222	91	1.72581	174.71	124.868	1.41187e+06
13	16.6154	73	1.40161	129.373	198.222	476138		9	25.2222	91	1.72576	174.704	124.869	1.41e+06
13	16.6154	73	1.40197	129.403	198.224	476379		9	25.2222	91	1.72597	174.674	124.886	1.4106e+06
13	16.6154	73	1.40205	129.417	198.224	479395		9	25.2222	91	1.72603	174.702	124.856	1.40817e+06
13	16.6154	73	1.40192	129.376	198.236	479503		9	25.2222	91	1.72629	174.729	124.839	1.40751e+06
13	16.6154	73	1.40184	129.35	198.214	483981		9	25.2222	91	1.72659	174.75	124.84	1.40566e+06
13	16.6154	73	1.40195	129.237	198.205	479843		9	25.2222	91	1.72652	174.754	124.842	1.4054e+06
13	16.6154	73	1.40182	129.342	198.223	487081		9	25.2222	91	1.72658	174.729	124.857	1.40589e+06
13	16.6154	73	1.40183	129.359	198.25	487866		9	25.2222	91	1.7263	174.706	124.857	1.40882e+06
13	16.6154	73	1.40145	129.334	198.265	482835		9	25.2222	91	1.7262	174.7	124.868	1.40633e+06
13	16.6154	73	1.4011	129.421	198.316	483617		9	25.2222	91	1.72612	174.696	124.896	1.40074e+06
13	16.6154	73	1.40154	129.446	198.328	470109		9	25.2222	91	1.72619	174.686	124.902	1.4024e+06
13	16.6154	73	1.40169	129.387	198.312	469035		9	25.2222	91	1.72625	174.654	124.918	1.40146e+06
13	16.6154	73	1.40169	129.308	198.367	479410		9	25.2222	91	1.72638	174.658	124.928	1.4018e+06
13	16.6154	73	1.40182	129.294	198.37	464364		9	25.2222	91	1.72608	174.664	124.921	1.40361e+06
13	16.6154	73	1.40168	129.267	198.47	468562		9	25.2222	91	1.72596	174.621	124.943	1.40186e+06
13	16.6154	73	1.40115	129.185	198.405	461389		9	25.2222	91	1.72595	174.634	124.916	1.40271e+06
13	16.6154	73	1.40114	129.291	198.378	473613		9	25.2222	91	1.7261	174.662	124.922	1.40021e+06
13	16.6154	73	1.40124	129.352	198.393	461517		9	25.2222	91	1.72609	174.644	124.934	1.40962e+06
13	16.6154	73	1.40147	129.357	198.365	454672		9	25.2222	91	1.72585	174.619	124.947	1.40319e+06
13	16.6154	73	1.40141	129.389	198.329	452161		9	25.2222	91	1.72557	174.619	124.942	1.41119e+06
13	16.6154	73	1.40129	129.43	198.371	455347		9	25.2222	91	1.72554	174.621	124.944	1.41045e+06
13	16.6154	73	1.40114	129.443	198.276	471162		9	25.2222	91	1.72572	174.636	124.957	1.40785e+06
13	16.6154	73	1.40108	129.436	198.308	459165		9	25.2222	91	1.72578	174.638	124.957	1.40693e+06
13	16.6154	73	1.40115	129.437	198.283	469487		9	25.2222	91	1.72601	174.691	124.944	1.39633e+06
13	16.6154	73	1.4012	129.435	198.25	465078		9	25.2222	91	1.72602	174.687	124.949	1.39226e+06
13	16.6154	73	1.40109	129.433	198.253	473181		9	25.2222	91	1.72596	174.693	124.953	1.39164e+06
13	16.6154	73	1.40091	129.445	198.239	470522		9	25.2222	91	1.72591	174.713	124.962	1.39331e+06
13	16.6154	73	1.40099	129.494	198.242	475818		9	25.2222	91	1.72593	174.702	124.951	1.39422e+06
13	16.6154	73	1.4008	129.489	198.23	474941		9	25.2222	91	1.72627	174.706	124.949	1.39208e+06
13	16.6154	73	1.40071	129.504	198.247	467546		9	25.2222	91	1.72618	174.705	124.93	1.39725e+06
13	16.6154	73	1.40057	129.506	198.28	468632		9	25.2222	91	1.72619	174.686	124.937	1.39614e+06
13	16.6154	73	1.40074	129.525	198.314	477295		9	25.2222	91	1.72597	174.69	124.947	1.38945e+06
13	16.6154	73	1.40064	129.523	198.406	479624		9	25.2222	91	1.72572	174.669	124.943	1.39931e+06
13	16.6154	73	1.40072	129.457	198.392	472459		9	25.2222	91	1.72589	174.669	124.938	1.40047e+06
13	16.6154	73	1.40058	129.476	198.355	467835		9	25.2222	91	1.72583	174.651	124.946	1.39079e+06
13	16.6154	73	1.40058	129.371	198.343	466856		9	25.2222	91	1.72585	174.675	124.946	1.38637e+06
13	16.6154	73	1.40047	129.396	198.383	469163		9	25.2222	91	1.72589	174.654	124.97	1.3914e+06
13	16.6154	73	1.40038	129.378	198.408	463952		9	25.2222	91	1.72583	174.656	124.97	1.3946e+06
13	16.6154	73	1.40038	129.369	198.349	467598		9	25.2222	91	1.72578	174.658	124.95	1.39446e+06
13	16.6154	73	1.40034	129.465	198.455	463804		9	25.2222	91	1.72573	174.704	124.933	1.38849e+06
13	16.6154	73	1.40034	129.469	198.493	459305		9	25.2222	91	1.72578	174.71	124.918	1.39293e+06
13	16.6154	73	1.40064	129.489	198.516	461153		9	25.2222	91	1.72573	174.732	124.917	1.40265e+06
13	16.6154	73	1.40066	129.517	198.538	457508		9	25.2222	91	1.72538	174.63	124.947	1.40498e+06
13	16.6154	73	1.40057	129.522	198.588	454850		9	25.2222	91	1.7253	174.624	124.931	1.40459e+06
13	16.6154	73	1.40047	129.498	198.574	460286		9	25.2222	91	1.72532	174.616	124.935	1.4008e+06
13	16.6154	73	1.40062	129.472	198.503	453470		9	25.2222	91	1.72528	174.612	124.93	1.40065e+06
11	19.9091	96	1.5872	177.193	116.981	1.89759e+06		7	32.4286	168	2.0882	229.039	73.7238	1.4488e+06
11	19.9091	96	1.58772	177.1	117.047	1.89815e+06		7	32.4286	168	2.08885	229.035	73.6452	1.50858e+06
11	19.9091	96	1.58809	177.109	117.122	1.88028e+06		7	32.4286	168	2.08937	228.793	73.8772	1.47411e+06
11	19.9091	96	1.58764	177.13	117.029	1.90169e+06		7	32.4286	168	2.08943	228.793	73.8472	1.47378e+06
11	19.9091	96	1.58763	177.092	117.07	1.89989e+06		7	32.4286	168	2.08915	228.614	74.012	1.47379e+06
11	19.9091	96	1.58761	177.068	117.12	1.88657e+06		7	32.4286	168	2.08912	228.841	73.803	1.51447e+06
11	19.9091	96	1.5876	177.126	117.047	1.88568e+06		7	32.4286	168	2.08942	228.541	74.0565	1.47368e+06
10	21.9	96	1.5873	177	117.1	1.88904e+06		7	32.4286	168	2.08941	228.732	73.9675	1.46081e+06
11	19.9091	96	1.58756	176.999	117.081	1.89094e+06		7	32.4286	168	2.08911	228.981	73.7685	1.46906e+06
10	21.9	106	1.58755	176.937	117.15	1.88831e+06		7	32.4286	168	2.08962	229.045	73.9043	1.43948e+06
10	21.9	106	1.58725	177.108	117.05	1.90036e+06		7	32.4286	168	2.08877	229.051	73.9315	1.43417e+06
10	21.9	106	1.58703	177.106	117.059	1.89895e+06		7	32.4286	168	2.08895	229.273	73.634	1.45127e+06
11	19.9091	96	1.58715	177.175	116.96	1.90061e+06		7	32.4286	168	2.08928	229.402	73.6249	1.44843e+06
10	21.9	106	1.5871	177.123	117.002	1.89984e+06		7	32.4286	168	2.08888	229.13	73.7431	1.44897e+06
9	24.3333	111	1.5873	177.16	116.995	1.89751e+06		6	37.8333	168	2.0881	228.968	73.8936	1.44535e+06
9	24.3333	111	1.58743	177.065	117.001	1.90243e+06		7	32.4286	168	2.08847	229.216	73.5971	1.48389e+06
10	21.9	106	1.58724	176.962	117.079	1.89682e+06		7	32.4286	168	2.08976	229.148	73.7358	1.46231e+06
9	24.3333	111	1.58764	177.016	117.072	1.89483e+06		7	32.4286	168	2.08936	229.294	73.6406	1.45339e+06
9	24.3333	111	1.58799	177.091	117.087	1.89271e+06		7	32.4286	168	2.08937	228.936	74.0264	1.43387e+06
9	24.3333	111	1.58787	177.093	117.125	1.89314e+06		7	32.4286	168	2.0905	228.987	73.8312	1.46496e+06
10	21.9	106	1.58827	177.13	117.162	1.89198e+06		7	32.4286	168	2.09061	229.526	73.4534	1.49152e+06
10	21.9	106	1.58852	177.187	117.076	1.89749e+06		7	32.4286	168	2.09021	229.041	73.8904	1.45073e+06
10	21.9	106	1.58844	177.236	117.1	1.90069e+06		7	32.4286	168	2.0901	229.042	74.0371	1.44325e+06
10	21.9	106	1.58902	177.372	117.099	1.87317e+06		7	32.4286	168	2.09062	229.394	73.8921	1.43818e+06
10	21.9	106	1.58905	177.388	117.06	1.87674e+06		7	32.4286	168	2.09059	229.465	73.7922	1.43456e+06
10	21.9	106	1.58894	177.457	117.054	1.88033e+06		7	32.4286	168	2.09178	229.493	73.8271	1.43424e+06
10	21.9	106	1.58904	177.502	117.042	1.88723e+06		6	37.8333	168	2.09221	229.435	73.8135	1.45183e+06
10	21.9	106	1.58911	177.488	117.049	1.88892e+06		6	37.8333	168	2.09116	229.287	73.8041	1.46217e+06
10	21.9	106	1.58908	177.443	117.07	1.89293e+06		6	37.8333	168	2.09067	228.888	74.2366	1.43967e+06
10	21.9	106	1.58888	177.366	117.11	1.89198e+06		6	37.8333	168	2.09082	228.801	74.3025	1.44601e+06
10	21.9	106	1.58889	177.479	117.069	1.89111e+06		6	37.8333	168	2.08976	228.826	74.3209	1.43981e+06
10	21.9	106	1.58885	177.415	117.159	1.89214e+06		6	37.8333	168	2.09065	228.819	74.2915	1.44371e+06
10	21.9	106	1.58915	177.425	117.15	1.89321e+06		6	37.8333	168	2.09011	228.875	74.168	1.4425e+06
10	21.9	106	1.58899	177.429	117.106	1.89536e+06		6	37.8333	168	2.09023	229.222	73.8553	1.46968e+06
10	21.9	106	1.58902	177.418	117.096	1.89871e+06		6	37.8333	168	2.09049	229.485	73.5327	1.50402e+06
10	21.9	106	1.58884	177.507	117.032	1.90067e+06		6	37.8333	168	2.08981	229.612	73.4134	1.5039e+06
10	21.9	106	1.58887	177.511	117.099	1.90013e+06		6	37.8333	168	2.0895	229.636	73.3123	1.50353e+06
10	21.9	106	1.58938	177.468	117.137	1.89867e+06		6	37.8333	168	2.08881	229.579	73.2481	1.50397e+06
10	21.9	106	1.58942	177.408	117.169	1.8982e+06		6	37.8333	168	2.08806	229.232	73.6119	1.50278e+06
10	21.9	106	1.58944	177.378	117.187	1.89978e+06		6	37.8333	168	2.08783	229.307	73.6321	1.49929e+06
10	21.9	106	1.59006	177.416	117.311	1.90623e+06		6	37.8333	168	2.08861	229.382	73.7035	1.45377e+06
10	21.9	106	1.59021	177.401	117.306	1.90296e+06		6	37.8333	168	2.08835	229.556	73.4168	1.49867e+06
10	21.9	106	1.59	177.481	117.291	1.90254e+06		6	37.8333	168	2.08848	229.356	73.6688	1.44562e+06
10	21.9	106	1.5895	177.443	117.277	1.90402e+06		7	32.4286	168	2.08953	229.435	73.4421	1.4994e+06
10	21.9	106	1.58947	177.469	117.275	1.89915e+06		7	32.4286	168	2.08939	229.168	73.5281	1.51359e+06
9	24.3333	111	1.58942	177.504	117.232	1.91398e+06		7	32.4286	168	2.08828	229.063	73.7266	1.46836e+06
9	24.3333	111	1.589	177.379	117.238	1.91044e+06		7	32.4286	168	2.08849	229.386	73.3613	1.50648e+06
10	21.9	106	1.58895	177.346	117.291	1.90855e+06		7	32.4286	168	2.08781	229.296	73.4238	1.50255e+06
10	21.9	106	1.58913	177.509	117.286	1.89744e+06		7	32.4286	168	2.08865	229.37	73.3641	1.50542e+06
10	21.9	106	1.58951	177.433	117.219	1.90352e+06		7	32.4286	168	2.08815	229.394	73.4525	1.46681e+06
9	24.3333	111	1.58978	177.474	117.172	1.89884e+06		7	32.4286	168	2.08948	229.428	73.5679	1.46928e+06
9	24.3333	111	1.59011	177.486	117.161	1.89974e+06		7	32.4286	168	2.08886	229.811	73.1702	1.49843e+06
9	24.3333	111	1.59029	177.595	117.112	1.90279e+06		7	32.4286	168	2.08921	229.781	73.2036	1.49133e+06
9	24.3333	111	1.59024	177.538	117.095	1.90323e+06		7	32.4286	168	2.08861	229.75	73.0984	1.4902e+06
9	24.3333	111	1.5902	177.652	117.154	1.89987e+06		7	32.4286	168	2.08804	229.591	73.2094	1.49435e+06
9	24.3333	111	1.58988	177.548	117.14	1.9007e+06		7	32.4286	168	2.0877	229.702	73.32	1.48919e+06
9	24.3333	111	1.58986	177.419	117.091	1.90601e+06		7	32.4286	168	2.08809	229.877	73.098	1.48993e+06
9	24.3333	111	1.58987	177.386	117.085	1.90427e+06		7	32.4286	168	2.08812	230.259	72.8828	1.47954e+06
10	21.9	106	1.58955	177.448	117.068	1.90243e+06		7	32.4286	168	2.08745	230.157	73.1331	1.43953e+06
9	24.3333	111	1.58956	177.495	117.066	1.90312e+06		7	32.4286	168	2.08658	230.092	73.0649	1.47242e+06
9	24.3333	111	1.58971	177.586	117.036	1.90335e+06		7	32.4286	168	2.08635	229.902	73.2236	1.44242e+06
9	24.3333	111	1.58969	177.577	117.035	1.90229e+06		7	32.4286	168	2.08628	229.931	73.1651	1.4421e+06
9	24.3333	111	1.58955	177.485	117.017	1.90723e+06		7	32.4286	168	2.0869	229.78	73.2188	1.44276e+06
10	21.9	106	1.58961	177.425	117.124	1.91008e+06		7	32.4286	168	2.08638	229.978	72.9784	1.47527e+06
10	21.9	106	1.58958	177.337	117.158	1.91138e+06		7	32.4286	168	2.08627	229.841	72.9474	1.47292e+06
10	21.9	106	1.58944	177.428	117.142	1.91338e+06		7	32.4286	168	2.08626	229.667	73.3366	1.4459e+06
10	21.9	106	1.58942	177.348	117.108	1.91176e+06		7	32.4286	168	2.08529	229.412	73.6663	1.441e+06
10	21.9	106	1.58952	177.425	117.116	1.90603e+06		7	32.4286	168	2.08463	229.711	73.4236	1.43466e+06
9	24.3333	111	1.58943	177.362	117.033	1.90285e+06		7	32.4286	168	2.08432	229.359	73.6534	1.44318e+06
9	24.3333	111	1.58883	177.255	117.049	1.90676e+06		6	37.8333	168	2.08417	229.443	73.5646	1.44496e+06
10	21.9	106	1.58866	177.34	116.973	1.91461e+06		6	37.8333	168	2.08406	230.099	73.0664	1.47299e+06
9	24.3333	111	1.5883	177.258	116.953	1.9071e+06		6	37.8333	168	2.08427	229.885	73.1424	1.47471e+06
9	24.3333	111	1.58872	177.3	116.979	1.90427e+06		6	37.8333	168	2.08419	229.765	73.2861	1.4491e+06
9	24.3333	111	1.58825	177.301	116.948	1.9058e+06		6	37.8333	168	2.08347	229.704	73.1278	1.47912e+06
9	24.3333	111	1.58847	177.382	116.947	1.89936e+06		6	37.8333	168	2.08369	230.512	72.6092	1.4695e+06
9	24.3333	111	1.58814	177.487	116.864	1.8903e+06		6	37.8333	168	2.08386	230.315	72.6045	1.46843e+06
9	24.3333	111	1.58762	177.326	116.974	1.89413e+06		6	37.8333	168	2.08291	230.329	72.4967	1.46193e+06
9	24.3333	111	1.58816	177.512	116.871	1.88866e+06		6	37.8333	168	2.08405	230.041	72.7691	1.47204e+06
9	24.3333	111	1.5882	177.519	116.878	1.88908e+06		7	32.4286	168	2.08382	230.445	72.5426	1.45893e+06
9	24.3333	111	1.58825	177.409	116.879	1.89172e+06		7	32.4286	168	2.08454	230.1	73.0901	1.43712e+06
9	24.3333	111	1.58812	177.513	116.787	1.89201e+06		7	32.4286	168	2.08447	230.547	72.7444	1.45676e+06
9	24.3333	111	1.58841	177.602	116.761	1.89021e+06		7	32.4286	168	2.08396	230.043	73.1177	1.43877e+06
9	24.3333	111	1.58824	177.603	116.841	1.88788e+06		7	32.4286	168	2.08422	230.255	73.0023	1.47584e+06
9	24.3333	111	1.58863	177.632	116.844	1.88701e+06		7	32.4286	168	2.08408	230.028	73.1722	1.483e+06
9	24.3333	111	1.58872	177.691	116.811	1.88399e+06		7	32.4286	168	2.08419	229.87	73.2168	1.48687e+06
9	24.3333	111	1.58863	177.691	116.786	1.88318e+06		7	32.4286	168	2.08428	230.02	73.1137	1.48469e+06
9	24.3333	111	1.5888	177.718	116.791	1.88183e+06		7	32.4286	168	2.08381	229.867	73.1528	1.48526e+06
10	21.9	106	1.58878	177.712	116.782	1.88724e+06		6	37.8333	168	2.08345	229.522	73.2035	1.49527e+06
10	21.9	106	1.58873	177.681	116.889	1.88472e+06		7	32.4286	168	2.08386	229.549	73.2373	1.49402e+06
10	21.9	106	1.58892	177.735	116.84	1.88169e+06		7	32.4286	168	2.08416	229.672	73.1241	1.49365e+06
10	21.9	106	1.58863	177.667	116.883	1.8826e+06		7	32.4286	168	2.08329	229.624	73.069	1.49132e+06
10	21.9	106	1.58839	177.719	116.869	1.87927e+06		7	32.4286	168	2.08299	229.618	73.3427	1.49541e+06
10	21.9	106	1.5885	177.701	116.803	1.88007e+06		7	32.4286	168	2.08309	229.879	73.1576	1.48915e+06
10	21.9	106	1.58829	177.653	116.805	1.8795e+06		7	32.4286	168	2.08196	230.024	72.9488	1.47483e+06
10	21.9	106	1.58806	177.678	116.799	1.88135e+06		7	32.4286	168	2.08253	229.88	73.1184	1.48047e+06
10	21.9	106	1.58755	177.631	116.756	1.88388e+06		7	32.4286	168	2.08314	229.459	73.442	1.4853e+06
10	21.9	106	1.5876	177.543	116.773	1.88563e+06		7	32.4286	168	2.08281	229.356	73.6935	1.48577e+06
10	21.9	106	1.58713	177.526	116.749	1.88556e+06		7	32.4286	168	2.08281	229.189	73.7094	1.4886e+06
10	21.9	106	1.58695	177.468	116.758	1.88919e+06		7	32.4286	168	2.08316	229.143	73.8739	1.45529e+06
10	21.9	106	1.58712	177.434	116.8	1.88845e+06		7	32.4286	168	2.08347	229.249	73.7273	1.45795e+06
12	18	67	1.49823	148.722	137.196	2.66552e+06		12	18.8333	43	1.82849	168.473	131.094	1.07183e+06
12	18	67	1.49823	148.795	137.108	2.6625e+06		12	18.8333	43	1.8287	168.46	131.077	1.08918e+06
12	18	67	1.49821	148.813	137.037	2.65856e+06		12	18.8333	43	1.82746	168.699	130.993	1.07029e+06
12	18	67	1.49835	148.842	137.036	2.65866e+06		12	18.8333	43	1.82863	168.787	130.96	1.07425e+06
12	18	67	1.49787	148.82	137.045	2.66104e+06		12	18.8333	43	1.8286	168.983	130.93	1.07765e+06
12	18	67	1.49775	148.811	137.042	2.65686e+06		12	18.8333	43	1.8284	168.854	130.986	1.0686e+06
12	18	67	1.49781	148.795	137.058	2.65984e+06		12	18.8333	43	1.82867	168.969	130.941	1.06549e+06
12	18	67	1.49792	148.801	137.038	2.65683e+06		12	18.8333	43	1.82983	169.153	130.918	1.06436e+06
12	18	67	1.49831	148.833	137.024	2.65712e+06		12	18.8333	43	1.83089	169.206	130.911	1.04845e+06
12	18	67	1.49816	148.819	137.027	2.65414e+06		12	18.8333	43	1.8311	169.159	130.897	1.04635e+06
12	18	67	1.49823	148.81	137.047	2.65622e+06		12	18.8333	43	1.83124	169.265	130.981	1.04e+06
12	18	67	1.49839	148.793	137.03	2.65204e+06		12	18.8333	43	1.83143	169.306	130.792	1.04335e+06
12	18	67	1.49832	148.842	137.038	2.6479e+06		12	18.8333	43	1.83201	169.296	130.875	1.04433e+06
12	18	67	1.4986	148.848	137.08	2.65028e+06		12	18.8333	43	1.83164	169.386	130.827	1.04189e+06
12	18	67	1.49813	148.851	137.118	2.64835e+06		12	18.8333	43	1.83146	169.475	130.732	1.03992e+06
12	18	67	1.49798	148.854	137.124	2.65133e+06		12	18.8333	43	1.83085	169.429	130.726	1.02998e+06
12	18	67	1.49817	148.848	137.122	2.65005e+06		12	18.8333	43	1.83115	169.09	130.74	1.05838e+06
12	18	67	1.49841	148.832	137.089	2.6498e+06		12	18.8333	43	1.83154	169.317	130.623	1.05462e+06
12	18	67	1.49851	148.871	137.029	2.6487e+06		12	18.8333	43	1.8305	169.452	130.563	1.05554e+06
12	18	67	1.49854	148.966	136.877	2.64281e+06		12	18.8333	43	1.83037	169.267	130.665	1.06149e+06
12	18	67	1.49858	148.986	136.858	2.64338e+06		12	18.8333	43	1.82994	169.182	130.795	1.07046e+06
12	18	67	1.49835	149.067	136.744	2.6408e+06		12	18.8333	43	1.83076	169.196	130.925	1.06638e+06
12	18	67	1.49845	149.036	136.822	2.63943e+06		12	18.8333	43	1.8304	168.868	130.897	1.07836e+06
12	18	67	1.49879	149.012	136.888	2.64368e+06		12	18.8333	43	1.83017	169.149	130.765	1.07284e+06
12	18	67	1.49908	149.05	136.784	2.64359e+06		12	18.8333	43	1.82991	169.358	130.633	1.06699e+06
12	18	67	1.49929	149.07	136.737	2.64156e+06		12	18.8333	43	1.82978	169.554	130.572	1.05717e+06
12	18	67	1.49942	149.037	136.682	2.69648e+06		12	18.8333	43	1.82926	169.662	130.462	1.08321e+06
12	18	67	1.49971	149.075	136.593	2.69245e+06		12	18.8333	43	1.82941	169.649	130.461	1.08515e+06
12	18	67	1.49982	149.058	136.631	2.69353e+06		12	18.8333	43	1.82901	169.669	130.658	1.08251e+06
12	18	67	1.50006	149.069	136.629	2.69285e+06		12	18.8333	43	1.8295	169.812	130.47	1.06134e+06
12	18	67	1.50038	149.147	136.51	2.64835e+06		12	18.8333	43	1.82942	169.656	130.697	1.06712e+06
12	18	67	1.50055	149.153	136.583	2.64894e+06		12	18.8333	43	1.83	169.535	130.856	1.07254e+06
12	18	67	1.50066	149.203	136.563	2.64974e+06		12	18.8333	43	1.83011	169.555	130.809	1.07189e+06
12	18	67	1.50063	149.151	136.59	2.64865e+06		12	18.8333	43	1.82963	169.484	130.836	1.09434e+06
12	18	67	1.50076	149.173	136.565	2.65211e+06		12	18.8333	43	1.82968	169.306	131.092	1.10029e+06
12	18	67	1.50109	149.223	136.534	2.64892e+06		12	18.8333	43	1.82965	169.266	131.252	1.10109e+06
12	18	67	1.50051	149.167	136.516	2.6876e+06		12	18.8333	43	1.83004	169.169	131.269	1.10246e+06
12	18	67	1.50054	149.131	136.572	2.63981e+06		12	18.8333	43	1.83016	169.33	131.33	1.0956e+06
12	18	67	1.5008	149.127	136.553	2.65689e+06		12	18.8333	43	1.83003	169.414	131.276	1.09014e+06
12	18	67	1.5009	149.166	136.55	2.65994e+06		12	18.8333	43	1.83004	169.387	131.117	1.09734e+06
12	18	67	1.50047	149.118	136.575	2.66078e+06		12	18.8333	43	1.82925	169.546	130.88	1.09494e+06
12	18	67	1.50016	149.091	136.559	2.69523e+06		12	18.8333	43	1.83013	169.685	130.564	1.09009e+06
13	16.6154	67	1.50006	149.101	136.514	2.70921e+06		12	18.8333	43	1.83022	169.377	130.6	1.10216e+06
13	16.6154	67	1.50007	149.163	136.437	2.69287e+06		12	18.8333	43	1.82977	169.375	130.547	1.10655e+06
13	16.6154	67	1.50004	149.144	136.514	2.70668e+06		12	18.8333	43	1.82937	169.299	130.634	1.10041e+06
13	16.6154	67	1.49986	149.096	136.54	2.65568e+06		12	18.8333	43	1.82919	169.333	130.717	1.10077e+06
13	16.6154	67	1.49989	148.999	136.644	2.67578e+06		12	18.8333	43	1.82904	169.379	130.81	1.09467e+06
13	16.6154	67	1.49995	149.018	136.6	2.67659e+06		12	18.8333	43	1.82905	169.46	130.764	1.09089e+06
13	16.6154	67	1.49996	148.999	136.617	2.71117e+06		12	18.8333	43	1.82978	169.254	130.82	1.10192e+06
13	16.6154	67	1.49984	149.049	136.558	2.70712e+06		12	18.8333	43	1.82986	169.185	130.906	1.10391e+06
13	16.6154	67	1.49991	149.046	136.577	2.70551e+06		12	18.8333	43	1.83035	169.319	131.012	1.0935e+06
13	16.6154	67	1.50019	149.103	136.566	2.69302e+06		12	18.8333	43	1.83075	169.213	131.134	1.09471e+06
13	16.6154	67	1.50019	149.032	136.607	2.69326e+06		12	18.8333	43	1.83044	169.062	131.131	1.10491e+06
13	16.6154	67	1.50057	149.087	136.625	2.62373e+06		12	18.8333	43	1.83103	168.979	131.164	1.10694e+06
13	16.6154	67	1.5009	149.125	136.598	2.6642e+06		12	18.8333	43	1.83116	168.957	131.071	1.10787e+06
13	16.6154	67	1.50101	149.11	136.599	2.64938e+06		12	18.8333	43	1.83123	168.992	130.977	1.10736e+06
13	16.6154	67	1.50064	149.077	136.567	2.7184e+06		12	18.8333	43	1.83078	169.024	131.002	1.1041e+06
13	16.6154	67	1.50046	149.1	136.58	2.68486e+06		12	18.8333	43	1.83095	169.074	131.041	1.10364e+06
13	16.6154	67	1.50045	149.184	136.409	2.70913e+06		12	18.8333	43	1.83098	168.948	131.285	1.10796e+06
13	16.6154	67	1.50038	149.149	136.417	2.67842e+06		12	18.8333	43	1.83026	169.129	131.201	1.09425e+06
13	16.6154	67	1.4998	149.136	136.422	2.67856e+06		12	18.8333	43	1.83008	169.067	131.304	1.09861e+06
13	16.6154	67	1.49955	149.113	136.43	2.64788e+06		12	18.8333	43	1.83051	169.176	131.226	1.09694e+06
13	16.6154	67	1.49977	149.145	136.404	2.65821e+06		12	18.8333	43	1.82998	169.263	131.147	1.09297e+06
13	16.6154	67	1.49953	149.11	136.397	2.66693e+06		12	18.8333	43	1.82982	169.447	131.114	1.08511e+06
13	16.6154	67	1.50004	149.105	136.384	2.67623e+06		12	18.8333	43	1.82953	169.422	131.107	1.08501e+06
13	16.6154	67	1.50008	149.169	136.312	2.64807e+06		12	18.8333	43	1.82979	169.498	131.1	1.08103e+06
13	16.6154	67	1.50022	149.111	136.373	2.65513e+06		12	18.8333	43	1.8293	169.535	131.149	1.07743e+06
13	16.6154	67	1.50014	149.174	136.249	2.66396e+06		12	18.8333	43	1.82901	169.467	131.163	1.08228e+06
13	16.6154	67	1.50035	149.106	136.348	2.65554e+06		12	18.8333	43	1.82908	169.576	131.231	1.0814e+06
13	16.6154	67	1.50026	149.073	136.406	2.65572e+06		12	18.8333	43	1.8292	169.534	131.268	1.0779e+06
13	16.6154	67	1.49964	149.04	136.362	2.65647e+06		12	18.8333	43	1.8288	169.308	131.256	1.08548e+06
13	16.6154	67	1.49972	149.085	136.32	2.69299e+06		12	18.8333	43	1.82901	169.298	131.3	1.08949e+06
13	16.6154	67	1.4996	149.064	136.408	2.67024e+06		12	18.8333	43	1.82765	169.309	131.326	1.08695e+06
13	16.6154	67	1.49942	149.06	136.379	2.67055e+06		12	18.8333	43	1.82753	169.507	131.121	1.08052e+06
13	16.6154	67	1.49975	149.095	136.363	2.65647e+06		12	18.8333	43	1.82794	169.587	130.89	1.07758e+06
13	16.6154	67	1.49969	149.065	136.409	2.65743e+06		12	18.8333	43	1.82838	169.685	130.953	1.07234e+06
13	16.6154	67	1.49985	149.08	136.396	2.66549e+06		12	18.8333	43	1.8281	169.762	130.815	1.07189e+06
12	18	67	1.49962	149.134	136.346	2.66387e+06		12	18.8333	43	1.82838	169.816	130.664	1.07023e+06
12	18	67	1.49951	149.206	136.246	2.6694e+06		12	18.8333	43	1.82831	169.82	130.606	1.07018e+06
13	16.6154	67	1.49955	149.24	136.233	2.65489e+06		12	18.8333	43	1.82838	169.808	130.577	1.07096e+06
13	16.6154	67	1.49909	149.145	136.254	2.66706e+06		12	18.8333	43	1.82808	169.938	130.545	1.05878e+06
13	16.6154	67	1.49965	149.287	136.163	2.64486e+06		12	18.8333	43	1.82864	169.944	130.505	1.06712e+06
13	16.6154	67	1.49978	149.31	136.144	2.63768e+06		12	18.8333	43	1.8284	170.025	130.431	1.06669e+06
13	16.6154	67	1.49966	149.31	136.147	2.63475e+06		12	18.8333	43	1.82876	169.949	130.559	1.07056e+06
13	16.6154	67	1.4997	149.306	136.142	2.6342e+06		12	18.8333	43	1.82833	169.868	130.562	1.07447e+06
13	16.6154	67	1.4999	149.364	136.102	2.63305e+06		12	18.8333	43	1.82864	169.826	130.615	1.07503e+06
13	16.6154	67	1.49963	149.368	136.083	2.63668e+06		12	18.8333	43	1.82897	169.828	130.575	1.07842e+06
13	16.6154	67	1.4996	149.304	136.214	2.62023e+06		12	18.8333	43	1.82922	169.965	130.502	1.07612e+06
13	16.6154	67	1.49956	149.341	136.111	2.69899e+06		12	18.8333	43	1.82944	169.988	130.606	1.07194e+06
13	16.6154	67	1.4996	149.386	136.065	2.70006e+06		12	18.8333	43	1.82891	169.902	130.698	1.07724e+06
13	16.6154	67	1.49948	149.388	136.092	2.69773e+06		12	18.8333	43	1.82892	170.044	130.693	1.06852e+06
13	16.6154	67	1.4996	149.419	136.111	2.66467e+06		12	18.8333	43	1.82937	169.98	130.635	1.06374e+06
13	16.6154	67	1.49981	149.402	136.194	2.66392e+06		12	18.8333	43	1.82882	170.011	130.635	1.06383e+06
13	16.6154	67	1.49967	149.407	136.235	2.66602e+06		12	18.8333	43	1.82831	170.04	130.619	1.06786e+06
13	16.6154	67	1.49944	149.274	136.303	2.67065e+06		12	18.8333	43	1.82836	170.099	130.609	1.06538e+06
13	16.6154	67	1.4997	149.3	136.276	2.65535e+06		12	18.8333	43	1.82923	170.226	130.568	1.05892e+06
13	16.6154	67	1.49967	149.269	136.3	2.67306e+06		12	18.8333	43	1.82943	170.086	130.662	1.05395e+06
13	16.6154	67	1.49951	149.22	136.347	2.67492e+06		12	18.8333	43	1.82929	170.136	130.64	1.05667e+06
13	16.6154	67	1.4994	149.223	136.337	2.64826e+06		12	18.8333	43	1.82888	170.167	130.661	1.05856e+06
13	16.6154	67	1.49953	149.261	136.302	2.64286e+06		12	18.8333	43	1.82921	170.272	130.641	1.05964e+06
14	15.3571	41	1.65238	175.047	99.7719	1.97298e+06		5	45.2	180	1.91291	221.522	77.8606	1.40487e+06
14	15.3571	41	1.65204	175.043	99.7727	1.97137e+06		5	45.2	180	1.91258	221.717	77.8024	1.40126e+06
14	15.3571	41	1.65192	175.061	99.7721	1.97096e+06		5	45.2	180	1.91178	221.729	77.8031	1.40103e+06
14	15.3571	41	1.65178	175.078	99.6767	1.97439e+06		5	45.2	180	1.91169	221.617	77.855	1.40147e+06
14	15.3571	41	1.65182	175.07	99.7171	1.97392e+06		5	45.2	180	1.91147	221.827	77.8105	1.3995e+06
14	15.3571	41	1.65214	175.111	99.7092	1.97076e+06		5	45.2	180	1.9119	221.751	77.7912	1.39867e+06
14	15.3571	41	1.65237	175.033	99.7601	1.97896e+06		5	45.2	180	1.91178	221.714	77.8219	1.39161e+06
14	15.3571	41	1.65258	175.081	99.7462	1.97979e+06		5	45.2	180	1.91156	221.585	77.9276	1.39308e+06
14	15.3571	41	1.65255	175.082	99.7519	1.9801e+06		5	45.2	180	1.91185	221.617	77.9161	1.39476e+06
14	15.3571	41	1.6518	175.057	99.7587	1.97905e+06		5	45.2	180	1.91179	221.65	77.8885	1.39441e+06
14	15.3571	41	1.65197	175.082	99.7492	1.97631e+06		5	45.2	180	1.91203	221.571	77.9631	1.39639e+06
14	15.3571	41	1.65179	175.069	99.766	1.97906e+06		5	45.2	180	1.91228	221.554	77.9566	1.39843e+06
14	15.3571	41	1.65155	175.071	99.7583	1.97902e+06		5	45.2	180	1.91187	221.674	77.8891	1.39814e+06
14	15.3571	41	1.65201	175.119	99.7277	1.97469e+06		5	45.2	180	1.91213	221.511	77.9278	1.39703e+06
14	15.3571	41	1.6525	175.145	99.7257	1.97029e+06		5	45.2	180	1.91205	221.489	77.9317	1.39234e+06
14	15.3571	41	1.65245	175.112	99.7309	1.97245e+06		5	45.2	180	1.91215	221.386	77.878	1.39904e+06
14	15.3571	41	1.65225	175.099	99.7374	1.9721e+06		5	45.2	180	1.91144	221.131	77.9517	1.40679e+06
14	15.3571	41	1.65214	175.106	99.7257	1.98176e+06		5	45.2	180	1.91194	221.215	77.9006	1.4079e+06
14	15.3571	41	1.6522	175.109	99.7326	1.98224e+06		5	45.2	180	1.91159	221.3	77.8753	1.40606e+06
14	15.3571	41	1.65203	175.121	99.7221	1.98233e+06		5	45.2	180	1.91124	221.104	77.9227	1.41626e+06
14	15.3571	41	1.65174	175.064	99.715	1.99259e+06		5	45.2	180	1.91117	221.041	77.9571	1.41663e+06
14	15.3571	41	1.65176	175.053	99.7024	2.01965e+06		5	45.2	180	1.91173	220.933	78.0168	1.41374e+06
14	15.3571	41	1.65184	175.049	99.7018	1.99508e+06		5	45.2	180	1.91193	221.234	77.905	1.41065e+06
14	15.3571	41	1.65202	175.054	99.7012	2.00375e+06		5	45.2	180	1.91129	220.864	78.0015	1.41841e+06
14	15.3571	41	1.65141	175.036	99.7057	1.99963e+06		5	45.2	180	1.91135	220.81	78.0151	1.41802e+06
14	15.3571	41	1.65168	175.065	99.642	1.98381e+06		5	45.2	180	1.91161	220.934	77.957	1.41899e+06
14	15.3571	41	1.65141	175.042	99.636	1.98808e+06		5	45.2	180	1.91124	220.714	78.0298	1.43156e+06
14	15.3571	41	1.65161	175.076	99.6284	1.98572e+06		5	45.2	180	1.91104	220.901	77.9827	1.42662e+06
14	15.3571	41	1.65182	175.057	99.6363	2.00212e+06		5	45.2	180	1.91071	221.14	77.8546	1.42452e+06
14	15.3571	41	1.65157	175.089	99.6213	1.99886e+06		5	45.2	180	1.91039	221.124	77.8267	1.43062e+06
14	15.3571	41	1.65171	175.082	99.6131	1.99092e+06		5	45.2	180	1.91007	221.087	77.8675	1.4299e+06
14	15.3571	41	1.65175	175.112	99.5814	1.98149e+06		5	45.2	180	1.91022	221.04	77.8907	1.42101e+06
14	15.3571	41	1.65177	175.077	99.5978	1.99312e+06		5	45.2	180	1.91037	221.033	77.9056	1.4211e+06
14	15.3571	41	1.65224	175.113	99.5879	1.97947e+06		5	45.2	180	1.90963	220.975	77.9472	1.41753e+06
14	15.3571	41	1.65231	175.066	99.6047	1.97267e+06		5	45.2	180	1.90968	220.807	78.018	1.42141e+06
14	15.3571	41	1.6523	175.078	99.6044	1.98049e+06		5	45.2	180	1.90984	220.782	78.0298	1.41542e+06
14	15.3571	41	1.65232	175.1	99.5875	1.99333e+06		5	45.2	180	1.90963	220.852	78.0277	1.3855e+06
14	15.3571	41	1.65268	175.099	99.5616	1.98928e+06		5	45.2	180	1.90946	220.945	77.9657	1.38363e+06
14	15.3571	41	1.6523	175.096	99.5834	1.99317e+06		5	45.2	180	1.90932	221.02	77.9666	1.37403e+06
14	15.3571	41	1.65235	175.103	99.5777	2.00228e+06		5	45.2	180	1.9097	220.999	77.9818	1.3727e+06
14	15.3571	41	1.65223	175.052	99.5833	1.99888e+06		5	45.2	180	1.90953	220.952	77.9826	1.40726e+06
14	15.3571	41	1.65265	175.094	99.5748	1.99102e+06		5	45.2	180	1.90938	220.694	78.1092	1.38065e+06
14	15.3571	41	1.65266	175.122	99.5473	1.9791e+06		5	45.2	180	1.90899	220.554	78.1966	1.41184e+06
14	15.3571	41	1.65253	175.082	99.6078	1.98259e+06		5	45.2	180	1.90898	220.671	78.1141	1.41216e+06
14	15.3571	41	1.65253	175.064	99.6038	1.98403e+06		5	45.2	180	1.90898	220.613	78.0776	1.41594e+06
14	15.3571	41	1.65229	175.016	99.6151	1.98541e+06		5	45.2	180	1.90846	220.894	77.978	1.41151e+06
14	15.3571	41	1.65241	174.982	99.636	1.99521e+06		5	45.2	180	1.90873	220.919	78.0042	1.41166e+06
14	15.3571	41	1.65221	174.917	99.6378	1.98939e+06		5	45.2	180	1.90888	221.03	77.9749	1.4075e+06
14	15.3571	41	1.65231	174.913	99.6621	2.00036e+06		5	45.2	180	1.90847	220.952	77.9917	1.40939e+06
14	15.3571	41	1.6524	174.918	99.6644	1.99604e+06		5	45.2	180	1.9088	220.981	77.9815	1.40621e+06
14	15.3571	41	1.65239	174.996	99.6416	1.99567e+06		5	45.2	180	1.90888	220.758	78.1216	1.38159e+06
14	15.3571	41	1.65256	175.079	99.5835	1.99476e+06		5	45.2	180	1.90883	220.912	78.0864	1.41607e+06
14	15.3571	41	1.65227	175.124	99.5865	1.98994e+06		5	45.2	180	1.90865	220.897	78.0981	1.41324e+06
14	15.3571	41	1.65179	175.062	99.5931	1.99429e+06		5	45.2	180	1.90821	220.905	78.0802	1.41773e+06
14	15.3571	41	1.6517	175.157	99.5261	2.00756e+06		5	45.2	180	1.90864	220.962	78.0423	1.41681e+06
14	15.3571	41	1.65144	175.203	99.5103	2.00097e+06		5	45.2	180	1.90838	220.945	78.0405	1.42006e+06
14	15.3571	41	1.65112	175.184	99.491	1.99991e+06		5	45.2	180	1.90841	220.886	78.0933	1.41813e+06
14	15.3571	41	1.65152	175.192	99.4921	1.99727e+06		5	45.2	180	1.90819	220.806	78.1241	1.41634e+06
14	15.3571	41	1.65119	175.208	99.4909	1.99678e+06		5	45.2	180	1.90802	220.76	78.1592	1.41931e+06
14	15.3571	41	1.65063	175.204	99.4875	1.99787e+06		5	45.2	180	1.90839	220.51	78.2566	1.42571e+06
14	15.3571	41	1.6507	175.184	99.497	2.00231e+06		5	45.2	180	1.90771	220.757	78.1581	1.41797e+06
14	15.3571	41	1.65046	175.153	99.4986	2.00354e+06		5	45.2	180	1.90743	220.775	78.1688	1.41736e+06
14	15.3571	41	1.6504	175.154	99.5074	2.00237e+06		5	45.2	180	1.90768	220.883	78.1208	1.38529e+06
14	15.3571	41	1.64963	175.084	99.5482	2.00834e+06		5	45.2	180	1.90748	220.873	78.1453	1.38544e+06
14	15.3571	41	1.64962	175.162	99.4993	2.00043e+06		5	45.2	180	1.90709	220.684	78.2088	1.36321e+06
14	15.3571	41	1.64953	175.167	99.4911	2.00006e+06		5	45.2	180	1.90741	220.701	78.1789	1.36998e+06
14	15.3571	41	1.64971	175.161	99.4965	2.00069e+06		5	45.2	180	1.90781	220.935	78.1042	1.36695e+06
14	15.3571	41	1.64953	175.151	99.475	2.00084e+06		5	45.2	180	1.90692	220.738	78.1548	1.38131e+06
14	15.3571	41	1.64988	175.174	99.4718	2.00111e+06		5	45.2	180	1.90702	220.808	78.1358	1.38188e+06
14	15.3571	41	1.64975	175.236	99.3964	1.9964e+06		5	45.2	180	1.907	220.895	78.1096	1.37588e+06
14	15.3571	41	1.64957	175.23	99.3712	1.99896e+06		5	45.2	180	1.90726	220.921	78.1113	1.36797e+06
14	15.3571	41	1.65008	175.238	99.3962	1.99969e+06		5	45.2	180	1.90708	220.991	78.0997	1.36399e+06
14	15.3571	41	1.65015	175.308	99.3812	2.00118e+06		5	45.2	180	1.90664	220.917	78.1181	1.3646e+06
14	15.3571	41	1.64987	175.267	99.4109	1.98234e+06		5	45.2	180	1.90717	220.905	78.1271	1.35933e+06
14	15.3571	41	1.6501	175.212	99.4216	2.00571e+06		5	45.2	180	1.90715	220.932	78.1109	1.36132e+06
14	15.3571	41	1.65062	175.219	99.4158	2.00337e+06		5	45.2	180	1.90722	221.096	78.0418	1.36174e+06
14	15.3571	41	1.65053	175.205	99.4123	1.99454e+06		5	45.2	180	1.90726	221.271	77.9802	1.35479e+06
14	15.3571	41	1.65063	175.19	99.4059	1.99545e+06		5	45.2	180	1.90764	221.562	77.8668	1.34021e+06
14	15.3571	41	1.65077	175.186	99.4079	1.9952e+06		5	45.2	180	1.90774	221.333	77.9542	1.35201e+06
14	15.3571	41	1.65024	175.177	99.4052	1.99531e+06		5	45.2	180	1.90762	221.299	77.9625	1.3428e+06
14	15.3571	41	1.65027	175.186	99.4114	1.99931e+06		5	45.2	180	1.9077	221.303	77.9428	1.34623e+06
14	15.3571	41	1.6501	175.176	99.4229	1.9977e+06		5	45.2	180	1.90736	221.18	77.9715	1.34594e+06
14	15.3571	41	1.64993	175.185	99.4586	1.99833e+06		5	45.2	180	1.90717	221.41	77.9118	1.34149e+06
14	15.3571	41	1.64939	175.136	99.4406	2.00069e+06		5	45.2	180	1.90723	221.255	77.9564	1.35696e+06
14	15.3571	41	1.64908	175.165	99.3959	2.0018e+06		5	45.2	180	1.90674	221.319	77.9397	1.35499e+06
14	15.3571	41	1.64913	175.199	99.3857	2.00643e+06		5	45.2	180	1.90676	221.379	77.9185	1.35252e+06
14	15.3571	41	1.64944	175.173	99.3602	2.01641e+06		5	45.2	180	1.90689	221.367	77.8782	1.35303e+06
14	15.3571	41	1.64929	175.216	99.3279	2.01263e+06		5	45.2	180	1.90688	221.29	77.9579	1.35687e+06
14	15.3571	41	1.64961	175.24	99.3342	1.9961e+06		5	45.2	180	1.907	221.145	78.0487	1.35375e+06
14	15.3571	41	1.6495	175.235	99.3375	2.00655e+06		5	45.2	180	1.9072	221.202	77.9866	1.35542e+06
14	15.3571	41	1.64897	175.195	99.3502	2.01389e+06		5	45.2	180	1.90702	221.351	77.9371	1.34961e+06
14	15.3571	41	1.64914	175.225	99.3309	1.99306e+06		5	45.2	180	1.90719	221.264	77.9445	1.34903e+06
14	15.3571	41	1.64877	175.192	99.3571	1.99366e+06		5	45.2	180	1.90688	221.249	77.9846	1.35413e+06
14	15.3571	41	1.64868	175.151	99.4145	2.01579e+06		5	45.2	180	1.9066	221.303	77.9802	1.35623e+06
14	15.3571	41	1.64837	175.196	99.3931	2.00149e+06		5	45.2	180	1.90666	221.488	77.9071	1.35037e+06
14	15.3571	41	1.64829	175.203	99.4023	1.99954e+06		5	45.2	180	1.90641	221.681	77.8717	1.34798e+06
14	15.3571	41	1.64835	175.21	99.3996	1.99774e+06		5	45.2	180	1.90639	221.665	77.8696	1.34723e+06
14	15.3571	41	1.64813	175.223	99.3838	1.99759e+06		5	45.2	180	1.9064	221.619	77.8662	1.34871e+06
14	15.3571	41	1.64829	175.236	99.3762	2.00027e+06		5	45.2	180	1.90627	221.571	77.89	1.35148e+06
14	15.3571	41	1.64813	175.236	99.3817	2.00026e+06		5	45.2	180	1.90658	221.459	77.9688	1.35389e+06
15	14.4	40	1.4592	136.648	149.602	1.79094e+06		10	22.6	71	1.8548	190.866	95.5463	2.37043e+06
15	14.4	40	1.45936	136.764	149.465	1.78846e+06		10	22.6	71	1.85474	190.888	95.5318	2.37539e+06
15	14.4	40	1.45936	136.824	149.379	1.78506e+06		10	22.6	71	1.855	190.953	95.5343	2.37441e+06
15	14.4	40	1.45946	136.891	149.354	1.72405e+06		10	22.6	71	1.85496	190.895	95.531	2.37088e+06
15	14.4	40	1.45953	136.946	149.269	1.72004e+06		10	22.6	71	1.85509	190.887	95.5196	2.3702e+06
15	14.4	40	1.4598	136.923	149.201	1.79861e+06		10	22.6	71	1.8548	190.882	95.5343	2.36859e+06
15	14.4	40	1.4597	136.972	149.185	1.74042e+06		10	22.6	71	1.85479	190.904	95.5119	2.37601e+06
15	14.4	40	1.45975	136.953	149.189	1.78579e+06		10	22.6	71	1.85434	190.77	95.5488	2.37056e+06
15	14.4	40	1.45988	136.943	149.191	1.80851e+06		10	22.6	71	1.85449	190.812	95.5206	2.36911e+06
15	14.4	40	1.45967	136.984	149.177	1.80426e+06		10	22.6	71	1.85476	190.741	95.5361	2.37449e+06
15	14.4	40	1.45964	136.775	149.411	1.82666e+06		10	22.6	71	1.85485	190.713	95.5497	2.37241e+06
15	14.4	40	1.46011	136.854	149.469	1.7641e+06		10	22.6	71	1.8549	190.647	95.5714	2.37544e+06
15	14.4	40	1.46005	136.868	149.478	1.75119e+06		10	22.6	71	1.85487	190.661	95.5822	2.37318e+06
15	14.4	40	1.46003	136.837	149.56	1.82647e+06		10	22.6	71	1.8545	190.59	95.5804	2.37712e+06
15	14.4	40	1.46004	136.708	149.72	1.77329e+06		10	22.6	71	1.85444	190.583	95.5321	2.37873e+06
15	14.4	40	1.46017	136.686	149.752	1.77931e+06		10	22.6	71	1.85515	190.779	95.4713	2.34345e+06
15	14.4	40	1.46007	136.663	149.807	1.77462e+06		10	22.6	71	1.85493	190.712	95.4808	2.37464e+06
15	14.4	40	1.46009	136.786	149.732	1.75314e+06		10	22.6	71	1.85509	190.817	95.4509	2.31376e+06
15	14.4	40	1.46026	136.832	149.692	1.75955e+06		10	22.6	71	1.8546	190.759	95.4442	2.373e+06
15	14.4	40	1.45981	136.873	149.672	1.75294e+06		10	22.6	71	1.8543	190.686	95.4033	2.35535e+06
15	14.4	40	1.45949	136.863	149.667	1.74182e+06		10	22.6	71	1.8539	190.779	95.3756	2.35375e+06
15	14.4	40	1.45924	136.82	149.63	1.74612e+06		10	22.6	71	1.85336	190.785	95.4296	2.35382e+06
15	14.4	40	1.4593	136.782	149.591	1.82046e+06		10	22.6	71	1.85333	190.779	95.4043	2.35445e+06
15	14.4	40	1.45968	136.9	149.508	1.81477e+06		10	22.6	71	1.85291	190.728	95.4684	2.35294e+06
15	14.4	40	1.45956	136.742	149.619	1.83049e+06		10	22.6	71	1.85316	190.709	95.5343	2.38417e+06
15	14.4	40	1.45931	136.665	149.735	1.83586e+06		10	22.6	71	1.85273	190.665	95.5879	2.38722e+06
15	14.4	40	1.45896	136.762	149.518	1.81078e+06		10	22.6	71	1.85317	190.678	95.5741	2.38665e+06
15	14.4	40	1.4589	136.777	149.51	1.80772e+06		10	22.6	71	1.853	190.731	95.5759	2.3874e+06
15	14.4	40	1.45895	136.818	149.449	1.809e+06		10	22.6	71	1.85324	190.702	95.5967	2.3866e+06
15	14.4	40	1.45906	136.82	149.403	1.813e+06		10	22.6	71	1.85327	190.671	95.5723	2.38863e+06
15	14.4	40	1.45903	136.85	149.362	1.82202e+06		10	22.6	71	1.85315	190.701	95.5801	2.39045e+06
15	14.4	40	1.4594	136.805	149.343	1.81921e+06		10	22.6	71	1.85352	190.758	95.5638	2.38827e+06
15	14.4	40	1.45929	136.735	149.438	1.81124e+06		10	22.6	71	1.85313	190.688	95.5803	2.39155e+06
15	14.4	40	1.45927	136.642	149.484	1.80201e+06		10	22.6	71	1.85312	190.574	95.6229	2.39309e+06
15	14.4	40	1.45937	136.475	149.688	1.82363e+06		10	22.6	71	1.8526	190.585	95.6554	2.38406e+06
15	14.4	40	1.45978	136.549	149.652	1.83106e+06		10	22.6	71	1.85261	190.719	95.6064	2.39202e+06
15	14.4	40	1.45994	136.437	149.815	1.83554e+06		10	22.6	71	1.85269	190.662	95.6257	2.38991e+06
15	14.4	40	1.45999	136.448	149.735	1.84308e+06		10	22.6	71	1.85243	190.61	95.643	2.37914e+06
15	14.4	40	1.46013	136.5	149.691	1.83569e+06		10	22.6	71	1.85202	190.54	95.6463	2.3797e+06
15	14.4	40	1.46047	136.519	149.704	1.83431e+06		10	22.6	71	1.85172	190.512	95.6677	2.37962e+06
15	14.4	40	1.45981	136.423	149.794	1.84704e+06		10	22.6	71	1.85189	190.596	95.6461	2.37816e+06
15	14.4	40	1.45942	136.498	149.757	1.83219e+06		10	22.6	71	1.85149	190.565	95.6472	2.38092e+06
15	14.4	40	1.45942	136.463	149.747	1.84528e+06		10	22.6	71	1.85198	190.595	95.6333	2.38448e+06
15	14.4	40	1.45934	136.526	149.676	1.83362e+06		10	22.6	71	1.85139	190.484	95.6682	2.3862e+06
15	14.4	40	1.45956	136.51	149.714	1.84964e+06		10	22.6	71	1.8517	190.448	95.6686	2.38799e+06
15	14.4	40	1.4596	136.497	149.715	1.85802e+06		10	22.6	71	1.85174	190.471	95.6704	2.3948e+06
15	14.4	40	1.45966	136.508	149.689	1.85337e+06		10	22.6	71	1.85204	190.437	95.6887	2.39561e+06
15	14.4	40	1.45955	136.532	149.768	1.83518e+06		10	22.6	71	1.85235	190.387	95.7126	2.39612e+06
15	14.4	40	1.45951	136.51	149.807	1.84082e+06		10	22.6	71	1.85197	190.482	95.6813	2.39683e+06
15	14.4	40	1.45968	136.488	149.851	1.8376e+06		10	22.6	71	1.85162	190.349	95.7586	2.39926e+06
15	14.4	40	1.45992	136.623	149.806	1.81974e+06		10	22.6	71	1.85124	190.38	95.7464	2.39828e+06
15	14.4	40	1.46004	136.705	149.731	1.80696e+06		10	22.6	71	1.85201	190.446	95.7176	2.39709e+06
15	14.4	40	1.45949	136.655	149.728	1.8114e+06		10	22.6	71	1.85238	190.568	95.6903	2.39523e+06
15	14.4	40	1.45952	136.752	149.692	1.7912e+06		10	22.6	71	1.85247	190.611	95.6704	2.39422e+06
15	14.4	40	1.45936	136.797	149.613	1.78903e+06		10	22.6	71	1.85236	190.558	95.6796	2.39585e+06
15	14.4	40	1.45904	136.808	149.594	1.78568e+06		10	22.6	71	1.85227	190.512	95.7002	2.39841e+06
15	14.4	40	1.45863	136.833	149.56	1.78397e+06		10	22.6	71	1.85226	190.42	95.7162	2.40054e+06
15	14.4	40	1.45887	136.856	149.601	1.77959e+06		10	22.6	71	1.85136	190.319	95.7626	2.39719e+06
15	14.4	40	1.45886	136.872	149.611	1.79651e+06		10	22.6	71	1.85142	190.263	95.7931	2.40282e+06
15	14.4	40	1.45881	136.873	149.653	1.77797e+06		10	22.6	71	1.85171	190.267	95.7904	2.40141e+06
15	14.4	40	1.45871	136.855	149.685	1.76092e+06		10	22.6	71	1.8513	190.267	95.797	2.39505e+06
15	14.4	40	1.45878	136.909	149.6	1.75655e+06		10	22.6	71	1.85076	190.231	95.7985	2.39469e+06
15	14.4	40	1.45898	136.906	149.634	1.75862e+06		10	22.6	71	1.85097	190.279	95.7977	2.39415e+06
15	14.4	40	1.45868	136.977	149.615	1.75504e+06		10	22.6	71	1.85094	190.275	95.8011	2.39533e+06
15	14.4	40	1.45888	136.991	149.639	1.75116e+06		10	22.6	71	1.85159	190.333	95.7923	2.39416e+06
15	14.4	40	1.45839	136.938	149.678	1.75285e+06		10	22.6	71	1.85162	190.328	95.7956	2.39447e+06
15	14.4	40	1.45851	136.923	149.731	1.749e+06		10	22.6	71	1.85146	190.277	95.7662	2.39986e+06
15	14.4	40	1.45839	136.851	149.717	1.75517e+06		10	22.6	71	1.85161	190.193	95.8112	2.3947e+06
15	14.4	40	1.45801	136.776	149.725	1.76321e+06		10	22.6	71	1.85148	190.264	95.77	2.39041e+06
15	14.4	40	1.45807	136.968	149.562	1.76692e+06		10	22.6	71	1.85238	190.336	95.735	2.39038e+06
15	14.4	40	1.45792	136.958	149.555	1.76851e+06		10	22.6	71	1.85214	190.325	95.7436	2.38281e+06
15	14.4	40	1.45802	136.975	149.557	1.74906e+06		10	22.6	71	1.8516	190.249	95.7781	2.39301e+06
15	14.4	40	1.45792	136.974	149.575	1.76215e+06		10	22.6	71	1.8519	190.337	95.7643	2.39113e+06
15	14.4	40	1.45817	137.035	149.571	1.75351e+06		10	22.6	71	1.85236	190.348	95.765	2.3907e+06
15	14.4	40	1.45811	137.08	149.515	1.73505e+06		10	22.6	71	1.85198	190.247	95.7811	2.39305e+06
15	14.4	40	1.45759	137.014	149.626	1.7356e+06		10	22.6	71	1.85197	190.372	95.7498	2.39187e+06
15	14.4	40	1.45779	137.018	149.666	1.73388e+06		10	22.6	71	1.85185	190.381	95.7509	2.39091e+06
15	14.4	40	1.45755	136.965	149.754	1.74343e+06		10	22.6	71	1.85146	190.342	95.7695	2.39152e+06
15	14.4	40	1.45788	136.936	149.782	1.74141e+06		10	22.6	71	1.85138	190.354	95.7652	2.39136e+06
15	14.4	40	1.45779	136.954	149.78	1.73379e+06		10	22.6	71	1.85139	190.407	95.7573	2.39197e+06
15	14.4	40	1.4574	136.835	149.845	1.74303e+06		10	22.6	71	1.85102	190.426	95.7671	2.39234e+06
15	14.4	40	1.45724	136.859	149.823	1.74953e+06		10	22.6	71	1.85093	190.344	95.7912	2.39384e+06
15	14.4	40	1.45717	136.778	149.937	1.75426e+06		10	22.6	71	1.85159	190.291	95.7842	2.39404e+06
15	14.4	40	1.45716	136.881	149.89	1.74014e+06		10	22.6	71	1.85167	190.293	95.7946	2.39106e+06
15	14.4	40	1.45739	136.802	149.962	1.74026e+06		10	22.6	71	1.85166	190.333	95.7864	2.39175e+06
15	14.4	40	1.45796	136.702	150	1.75984e+06		10	22.6	71	1.85228	190.425	95.7577	2.39053e+06
15	14.4	40	1.45797	136.845	149.824	1.7443e+06		10	22.6	71	1.85275	190.509	95.7366	2.39045e+06
15	14.4	40	1.45802	136.941	149.745	1.73149e+06		10	22.6	71	1.85258	190.603	95.6947	2.39497e+06
15	14.4	40	1.45845	136.973	149.744	1.73215e+06		10	22.6	71	1.8526	190.576	95.7	2.39543e+06
15	14.4	40	1.45845	136.769	149.777	1.76294e+06		10	22.6	71	1.85187	190.486	95.7007	2.39064e+06
15	14.4	40	1.45818	136.851	149.718	1.75269e+06		10	22.6	71	1.85201	190.448	95.7005	2.38807e+06
15	14.4	40	1.45828	136.807	149.685	1.75292e+06		10	22.6	71	1.8521	190.486	95.6795	2.37979e+06
15	14.4	40	1.45829	136.827	149.699	1.74539e+06		10	22.6	71	1.85155	190.496	95.6874	2.38691e+06
15	14.4	40	1.45823	136.898	149.652	1.74509e+06		10	22.6	71	1.85146	190.513	95.691	2.38548e+06
15	14.4	40	1.45849	136.74	149.613	1.77827e+06		10	22.6	71	1.85176	190.51	95.6917	2.39372e+06
15	14.4	40	1.45858	136.73	149.671	1.77159e+06		10	22.6	71	1.85136	190.528	95.6744	2.39367e+06
15	14.4	40	1.45884	136.727	149.646	1.76584e+06		10	22.6	71	1.85146	190.521	95.6793	2.38597e+06
15	14.4	40	1.45879	136.703	149.637	1.78926e+06		10	22.6	71	1.85188	190.572	95.6759	2.39338e+06
15	14.4	40	1.45848	136.551	149.831	1.80559e+06		10	22.6	71	1.85233	190.567	95.6782	2.38629e+06
15	14.4	40	1.45831	136.423	149.817	1.81877e+06		10	22.6	71	1.85236	190.543	95.7165	2.38239e+06
11	19.6364	88	1.58929	174.806	104.403	2.63961e+06		11	20.5455	102	1.7354	177.503	109.066	2.8048e+06
11	19.6364	88	1.58949	174.835	104.431	2.64932e+06		11	20.5455	102	1.73579	177.362	109.151	2.81506e+06
11	19.6364	88	1.58969	175.006	104.435	2.64236e+06		11	20.5455	102	1.7357	177.392	109.114	2.81509e+06
11	19.6364	88	1.58983	175.192	104.296	2.60526e+06		11	20.5455	102	1.73591	177.418	109.13	2.81694e+06
11	19.6364	88	1.59024	175.11	104.353	2.62815e+06		11	20.5455	102	1.73598	177.275	109.135	2.81425e+06
11	19.6364	88	1.59019	175.275	104.295	2.62613e+06		11	20.5455	102	1.73609	177.39	109.094	2.80967e+06
11	19.6364	88	1.58984	175.306	104.168	2.61733e+06		11	20.5455	102	1.73559	177.207	109.146	2.82012e+06
11	19.6364	88	1.58933	175.212	104.126	2.61356e+06		11	20.5455	102	1.73594	177.091	109.229	2.82266e+06
11	19.6364	88	1.58941	175.249	104.128	2.60867e+06		11	20.4545	102	1.73559	177.075	109.252	2.82476e+06
11	19.6364	88	1.58991	175.533	103.85	2.59367e+06		11	20.4545	102	1.7364	177.167	109.226	2.81814e+06
11	19.6364	88	1.58932	175.685	103.813	2.59059e+06		11	20.4545	102	1.73661	177.259	109.234	2.83991e+06
11	19.6364	88	1.58965	175.951	103.774	2.5843e+06		11	20.4545	102	1.73648	177.252	109.257	2.82754e+06
11	19.6364	88	1.58995	176.032	103.817	2.57739e+06		11	20.4545	102	1.73658	177.286	109.259	2.85043e+06
11	19.6364	88	1.59042	176.121	103.779	2.57472e+06		11	20.4545	102	1.73675	177.218	109.334	2.85575e+06
11	19.6364	88	1.59018	176.115	103.796	2.58143e+06		11	20.4545	102	1.73687	177.171	109.362	2.84039e+06
11	19.6364	88	1.59013	176.222	103.788	2.57787e+06		11	20.4545	102	1.73672	177.054	109.403	2.84669e+06
11	19.6364	88	1.59036	176.219	103.754	2.58132e+06		11	20.4545	102	1.73651	177.244	109.307	2.83288e+06
11	19.6364	88	1.59017	176.364	103.756	2.62104e+06		11	20.4545	102	1.73678	177.241	109.329	2.84426e+06
11	19.6364	88	1.59054	176.386	103.743	2.60984e+06		11	20.4545	102	1.73695	177.462	109.23	2.83585e+06
11	19.6364	88	1.59047	176.281	103.771	2.60481e+06		11	20.4545	102	1.73739	177.472	109.218	2.83509e+06
11	19.6364	88	1.5908	176.296	103.725	2.63558e+06		11	20.4545	102	1.73692	177.41	109.272	2.84025e+06
11	19.6364	88	1.59068	176.117	103.881	2.63271e+06		11	20.4545	102	1.73716	177.35	109.312	2.84729e+06
11	19.6364	88	1.5908	176.124	103.898	2.62153e+06		11	20.4545	102	1.73714	177.23	109.335	2.8264e+06
11	19.6364	88	1.59032	176.217	103.788	2.62372e+06		11	20.4545	102	1.7369	177.31	109.272	2.82104e+06
11	19.6364	88	1.59036	176.412	103.664	2.60767e+06		11	20.4545	102	1.73693	177.245	109.248	2.8149e+06
11	19.6364	88	1.5907	176.522	103.673	2.57938e+06		11	20.4545	102	1.73713	177.5	109.16	2.82224e+06
11	19.6364	88	1.59094	176.685	103.61	2.58297e+06		11	20.4545	102	1.73698	177.455	109.107	2.81469e+06
11	19.6364	88	1.5905	176.741	103.51	2.58002e+06		11	20.4545	102	1.73656	177.446	109.12	2.82579e+06
11	19.6364	88	1.59099	176.914	103.466	2.5767e+06		11	20.4545	102	1.73676	177.5	109.148	2.83561e+06
11	19.6364	88	1.59066	176.837	103.546	2.57749e+06		11	20.4545	102	1.73641	177.632	109.115	2.82731e+06
11	19.6364	88	1.59064	176.577	103.671	2.56124e+06		11	20.4545	102	1.73658	177.494	109.208	2.83786e+06
11	19.6364	88	1.59056	176.572	103.63	2.57849e+06		11	20.4545	102	1.73652	177.499	109.186	2.82744e+06
11	19.6364	88	1.59055	176.743	103.609	2.57412e+06		11	20.4545	102	1.73694	177.549	109.179	2.8341e+06
11	19.6364	88	1.59014	176.677	103.579	2.57499e+06		11	20.4545	102	1.73686	177.498	109.17	2.82967e+06
11	19.6364	88	1.58993	176.676	103.508	2.55556e+06		11	20.4545	102	1.73661	177.531	109.132	2.82302e+06
11	19.6364	88	1.59045	176.679	103.557	2.57086e+06		11	20.4545	102	1.73636	177.596	109.133	2.81097e+06
11	19.6364	88	1.59118	176.76	103.491	2.56282e+06		11	20.4545	102	1.73677	177.576	109.182	2.83202e+06
11	19.6364	88	1.59118	176.76	103.491	2.56282e+06		11	20.5455	102	1.73676	177.763	109.081	2.80305e+06
11	19.6364	88	1.59143	176.673	103.519	2.56103e+06		11	20.5455	102	1.73652	177.748	109.087	2.81715e+06
11	19.6364	88	1.5915	176.615	103.632	2.56566e+06		11	20.5455	102	1.7369	177.659	109.118	2.82624e+06
11	19.6364	88	1.59121	176.751	103.553	2.56304e+06		11	20.5455	102	1.73708	177.642	109.093	2.82743e+06
11	19.6364	88	1.59142	176.793	103.532	2.55235e+06		11	20.5455	102	1.73707	177.605	109.123	2.79519e+06
11	19.6364	88	1.59182	176.785	103.531	2.55352e+06		11	20.5455	102	1.73728	177.648	109.082	2.78452e+06
11	19.6364	88	1.5918	176.809	103.526	2.59883e+06		11	20.5455	102	1.73732	177.682	109.133	2.80019e+06
11	19.6364	88	1.59168	176.836	103.482	2.59742e+06		11	20.5455	102	1.73735	177.759	109.056	2.79383e+06
11	19.6364	88	1.59153	176.815	103.412	2.59182e+06		11	20.5455	102	1.73735	177.817	108.994	2.78888e+06
11	19.6364	88	1.5915	176.796	103.384	2.59385e+06		11	20.5455	102	1.73743	177.919	108.949	2.78212e+06
11	19.6364	88	1.59176	176.903	103.328	2.58644e+06		11	20.5455	102	1.73724	177.842	108.953	2.80872e+06
11	19.6364	88	1.59151	176.802	103.402	2.59133e+06		11	20.5455	102	1.73726	177.812	108.966	2.80127e+06
11	19.6364	88	1.59178	176.829	103.384	2.58858e+06		11	20.5455	102	1.73656	177.608	109.031	2.80459e+06
11	19.6364	88	1.5915	176.896	103.382	2.58396e+06		11	20.4545	102	1.73634	177.718	108.948	2.79838e+06
11	19.6364	88	1.59211	176.892	103.42	2.58931e+06		11	20.4545	102	1.73681	177.782	108.887	2.7842e+06
11	19.6364	88	1.59223	176.777	103.515	2.59503e+06		11	20.4545	102	1.73644	177.673	108.934	2.78663e+06
11	19.6364	88	1.59248	176.819	103.537	2.58293e+06		11	20.4545	102	1.73584	177.741	108.849	2.77602e+06
11	19.6364	88	1.59271	176.83	103.551	2.58443e+06		11	20.4545	102	1.73594	177.772	108.854	2.77555e+06
11	19.6364	88	1.59269	176.824	103.536	2.56867e+06		11	20.5455	102	1.73588	177.487	108.92	2.77246e+06
11	19.6364	88	1.59233	176.82	103.534	2.58071e+06		11	20.4545	102	1.7362	177.626	108.868	2.76904e+06
11	19.6364	88	1.59211	176.814	103.532	2.57883e+06		11	20.5455	102	1.73584	177.84	108.741	2.76802e+06
11	19.6364	88	1.59222	176.759	103.544	2.58149e+06		11	20.5455	102	1.7354	177.883	108.736	2.76693e+06
11	19.6364	88	1.59259	176.767	103.542	2.58116e+06		11	20.5455	102	1.73502	177.822	108.77	2.7552e+06
11	19.6364	88	1.59197	176.765	103.564	2.58436e+06		11	20.5455	102	1.73475	177.84	108.734	2.73989e+06
11	19.6364	88	1.59187	176.651	103.595	2.56803e+06		11	20.5455	102	1.73476	177.837	108.742	2.74271e+06
11	19.6364	88	1.5919	176.643	103.624	2.56864e+06		11	20.5455	102	1.73427	177.931	108.716	2.73921e+06
11	19.6364	88	1.59174	176.617	103.512	2.5692e+06		11	20.5455	102	1.73385	177.957	108.723	2.7369e+06
11	19.6364	88	1.59168	176.651	103.544	2.5672e+06		11	20.5455	102	1.7339	177.96	108.713	2.75257e+06
11	19.6364	88	1.59171	176.711	103.534	2.56374e+06		11	20.5455	102	1.73383	177.927	108.77	2.73652e+06
11	19.6364	88	1.59136	176.701	103.53	2.56497e+06		11	20.5455	102	1.73339	177.956	108.76	2.73556e+06
11	19.6364	88	1.59146	176.857	103.455	2.56597e+06		11	20.5455	102	1.73342	177.871	108.788	2.73858e+06
11	19.6364	88	1.59122	176.811	103.454	2.56321e+06		11	20.5455	102	1.7334	177.813	108.764	2.75692e+06
11	19.6364	88	1.59094	176.8	103.477	2.56511e+06		11	20.5455	102	1.73334	177.99	108.668	2.75567e+06
11	19.6364	88	1.59128	176.791	103.446	2.56143e+06		11	20.5455	102	1.73324	178.048	108.631	2.75575e+06
11	19.6364	88	1.59155	176.851	103.356	2.55915e+06		11	20.5455	102	1.73322	178.008	108.612	2.75358e+06
11	19.6364	88	1.5913	177.004	103.305	2.55098e+06		11	20.5455	102	1.73363	178.031	108.637	2.74961e+06
11	19.6364	88	1.59158	176.962	103.308	2.5532e+06		11	20.5455	102	1.73329	178.059	108.61	2.74957e+06
11	19.6364	88	1.59198	176.956	103.264	2.54986e+06		11	20.5455	102	1.73348	178.004	108.585	2.74476e+06
11	19.6364	88	1.5919	176.993	103.274	2.5526e+06		11	20.5455	102	1.73347	178.079	108.541	2.74935e+06
11	19.6364	88	1.59164	176.93	103.346	2.55092e+06		11	20.5455	102	1.73364	178.088	108.504	2.73597e+06
11	19.6364	88	1.59153	176.87	103.509	2.55538e+06		11	20.5455	102	1.73365	177.955	108.557	2.72066e+06
11	19.6364	88	1.59144	176.808	103.444	2.55401e+06		11	20.5455	102	1.73341	177.934	108.594	2.7284e+06
11	19.6364	88	1.59183	176.769	103.576	2.55466e+06		11	20.5455	102	1.73326	178.053	108.565	2.72908e+06
11	19.6364	88	1.59143	176.712	103.498	2.55308e+06		11	20.5455	102	1.73352	178.135	108.532	2.73945e+06
11	19.6364	88	1.59186	176.785	103.46	2.54853e+06		11	20.5455	102	1.73349	177.772	108.685	2.74756e+06
11	19.6364	88	1.59211	176.817	103.398	2.54632e+06		11	20.5455	102	1.73282	177.78	108.714	2.73591e+06
11	19.6364	88	1.592	176.808	103.335	2.54597e+06		11	20.5455	102	1.73285	177.685	108.731	2.73609e+06
11	19.6364	88	1.59183	176.569	103.54	2.55483e+06		11	20.5455	102	1.73322	177.76	108.716	2.73143e+06
11	19.6364	88	1.59191	176.601	103.506	2.52763e+06		11	20.5455	102	1.73363	177.954	108.657	2.71519e+06
11	19.6364	88	1.59223	176.431	103.61	2.52609e+06		11	20.5455	102	1.73356	177.749	108.744	2.71827e+06
11	19.6364	88	1.59244	176.578	103.563	2.54862e+06		11	20.4545	102	1.73324	177.549	108.806	2.72223e+06
11	19.6364	88	1.59266	176.519	103.625	2.51703e+06		11	20.5455	102	1.73362	177.71	108.746	2.72052e+06
11	19.6364	88	1.59277	176.576	103.664	2.52218e+06		11	20.5455	102	1.73342	177.511	108.816	2.7299e+06
11	19.6364	88	1.59229	176.555	103.717	2.56477e+06		11	20.5455	102	1.7339	177.534	108.799	2.72825e+06
11	19.6364	88	1.59182	176.477	103.753	2.57276e+06		11	20.5455	102	1.73354	177.517	108.826	2.7265e+06
11	19.6364	88	1.59207	176.525	103.728	2.52998e+06		11	20.5455	102	1.73338	177.492	108.868	2.73468e+06
11	19.6364	88	1.59175	176.475	103.757	2.53146e+06		11	20.5455	102	1.73318	177.461	108.931	2.75906e+06
11	19.6364	88	1.59131	176.573	103.708	2.56059e+06		11	20.5455	102	1.73301	177.349	108.956	2.7592e+06
11	19.6364	88	1.5911	176.596	103.611	2.55803e+06		11	20.5455	102	1.73275	177.462	108.952	2.76225e+06
11	19.6364	88	1.59134	176.555	103.657	2.55334e+06		11	20.5455	102	1.73277	177.415	109.011	2.76888e+06
11	19.6364	88	1.59133	176.751	103.603	2.55747e+06		11	20.5455	102	1.73308	177.463	109.028	2.7633e+06
11	19.6364	88	1.59213	176.778	103.605	2.52072e+06		11	20.5455	102	1.73305	177.393	109.05	2.76013e+06
11	19.6364	88	1.59212	176.78	103.589	2.51523e+06		11	20.5455	102	1.73302	177.511	109.034	2.75526e+06
11	19.8182	97	1.47091	165.907	153.154	1.08661e+06		9	25.1111	76	1.90065	183.327	109.477	1.93511e+06
11	19.8182	97	1.47117	165.974	153.165	1.08662e+06		9	25.1111	76	1.90043	183.351	109.303	2.02169e+06
11	19.8182	97	1.47106	166.005	153.183	1.08782e+06		9	25.1111	76	1.90015	183.358	109.365	2.0221e+06
11	19.8182	97	1.47096	166.03	153.147	1.09964e+06		9	25.1111	76	1.9004	183.332	109.374	2.02244e+06
11	19.8182	97	1.47086	166.025	153.117	1.09959e+06		9	25.1111	76	1.89987	183.478	109.322	2.02039e+06
11	19.8182	97	1.47103	166.008	153.101	1.10099e+06		9	25.1111	76	1.90008	183.29	109.462	1.93923e+06
11	19.8182	97	1.47109	165.988	153.144	1.1002e+06		9	25.1111	76	1.90006	183.231	109.508	2.03321e+06
11	19.8182	97	1.47129	165.995	153.132	1.09796e+06		9	25.1111	76	1.90035	183.241	109.511	2.05213e+06
11	19.8182	97	1.47131	165.967	153.175	1.09562e+06		9	25.1111	76	1.89916	183.219	109.452	1.97139e+06
11	19.8182	97	1.47145	165.918	153.155	1.09257e+06		9	25.1111	76	1.89956	183.243	109.457	1.9522e+06
11	19.8182	97	1.47146	165.949	153.128	1.09127e+06		9	25.1111	76	1.90009	183.485	109.354	1.9122e+06
11	19.8182	97	1.47169	165.905	153.124	1.09402e+06		9	25.1111	76	1.90033	183.582	109.429	1.98187e+06
11	19.8182	97	1.4714	165.928	153.098	1.09235e+06		9	25.1111	76	1.90196	183.797	109.363	2.02775e+06
11	19.8182	97	1.47151	165.905	153.104	1.09846e+06		9	25.1111	76	1.90148	183.776	109.35	2.02047e+06
11	19.8182	97	1.47177	165.922	153.136	1.13351e+06		8	28.25	76	1.9015	183.752	109.354	2.02453e+06
11	19.8182	97	1.47159	165.832	153.088	1.09971e+06		9	25.1111	76	1.90156	183.584	109.524	2.04421e+06
11	19.8182	97	1.47205	165.862	153.076	1.09653e+06		9	25.1111	76	1.90175	183.641	109.482	2.02067e+06
11	19.8182	97	1.47233	166.058	153.079	1.08488e+06		9	25.1111	76	1.90131	183.598	109.459	2.0201e+06
11	19.8182	97	1.47188	165.998	153.059	1.08776e+06		9	25.1111	76	1.90206	183.789	109.388	2.01016e+06
11	19.8182	97	1.47203	165.874	153.092	1.0922e+06		9	25.1111	76	1.90221	183.83	109.417	1.98188e+06
11	19.8182	97	1.47229	165.947	153.098	1.09109e+06		9	25.1111	76	1.90311	183.894	109.32	1.97903e+06
11	19.8182	97	1.47234	165.862	153.081	1.08344e+06		9	25.1111	76	1.90394	184.006	109.343	1.99591e+06
11	19.8182	97	1.47204	165.907	153.103	1.08111e+06		9	25.1111	76	1.90369	184.127	109.071	2.00288e+06
11	19.8182	97	1.4719	165.852	153.117	1.11905e+06		9	25.1111	76	1.90374	184.123	109.034	2.02247e+06
11	19.8182	97	1.47172	165.81	153.082	1.11901e+06		9	25.1111	76	1.90364	184.122	109.141	1.99547e+06
11	19.8182	97	1.47177	165.744	153.084	1.12124e+06		9	25.1111	76	1.90438	184.109	109.333	1.99787e+06
11	19.8182	97	1.47194	165.835	153.102	1.12647e+06		9	25.1111	76	1.90364	184.028	109.265	1.99697e+06
11	19.8182	97	1.47154	165.704	153.127	1.12931e+06		9	25.1111	76	1.90429	184.007	109.164	2e+06
11	19.8182	97	1.47124	165.761	153.128	1.13071e+06		9	25.1111	76	1.90533	184.285	109.084	1.98981e+06
11	19.8182	97	1.47107	165.724	153.152	1.13257e+06		9	25.1111	76	1.90526	184.334	109.103	1.98576e+06
11	19.8182	97	1.47098	165.725	153.112	1.0974e+06		9	25.1111	76	1.90555	184.3	109.107	1.98737e+06
11	19.8182	97	1.4711	165.755	153.121	1.10019e+06		9	25.1111	76	1.90506	184.139	109.206	2.0012e+06
11	19.8182	97	1.47123	165.748	153.114	1.13312e+06		9	25.1111	76	1.90486	184.149	109.221	1.99129e+06
11	19.8182	97	1.47111	165.631	153.107	1.13639e+06		9	25.1111	76	1.90501	184.067	109.246	1.9867e+06
11	19.8182	97	1.47102	165.687	153.088	1.12694e+06		9	25.1111	76	1.90501	184.067	109.246	1.9867e+06
11	19.8182	97	1.47125	165.7	153.138	1.13237e+06		9	25.1111	76	1.90445	184.097	109.197	1.99283e+06
11	19.8182	97	1.47133	165.66	153.142	1.13569e+06		9	25.1111	76	1.90398	184.14	109.11	1.99454e+06
11	19.8182	97	1.47159	165.655	153.141	1.13662e+06		9	25.1111	76	1.90472	184.146	109.11	1.99748e+06
11	19.8182	97	1.472	165.7	153.148	1.12882e+06		9	25.1111	76	1.90496	184.046	109.286	1.99547e+06
11	19.8182	97	1.47201	165.694	153.141	1.13335e+06		9	25.1111	76	1.90536	184.211	109.18	2.0101e+06
11	19.8182	97	1.47225	165.674	153.156	1.10894e+06		9	25.1111	76	1.90576	184.275	109.079	2.00695e+06
11	19.8182	97	1.4719	165.597	153.118	1.11055e+06		9	25.1111	76	1.90566	184.166	109.108	2.00272e+06
11	19.8182	97	1.47173	165.651	153.097	1.10883e+06		9	25.1111	76	1.90619	184.373	108.962	2.00354e+06
11	19.8182	97	1.47165	165.68	153.078	1.10238e+06		9	25.1111	76	1.90642	184.394	108.988	2.00711e+06
11	19.8182	97	1.47163	165.694	153.075	1.10575e+06		9	25.1111	76	1.90591	184.556	108.813	2.00135e+06
11	19.8182	97	1.47198	165.686	153.079	1.10337e+06		9	25.1111	76	1.90573	184.43	108.886	2.05968e+06
11	19.8182	97	1.47187	165.662	153.086	1.10862e+06		9	25.1111	76	1.9056	184.522	108.867	2.0575e+06
11	19.8182	97	1.47188	165.675	153.097	1.10951e+06		9	25.1111	76	1.90487	184.435	108.871	2.00373e+06
11	19.8182	97	1.47201	165.76	153.092	1.11031e+06		9	25.1111	76	1.90491	184.518	108.837	2.00249e+06
11	19.8182	97	1.47167	165.655	153.075	1.11011e+06		9	25.1111	76	1.90565	184.674	108.725	1.98362e+06
11	19.8182	97	1.47187	165.772	153.053	1.10219e+06		9	25.1111	76	1.90645	184.679	108.742	2.03426e+06
11	19.8182	97	1.47155	165.713	153.038	1.09603e+06		9	25.1111	76	1.90613	184.579	108.82	2.03864e+06
11	19.8182	97	1.47124	165.679	153.049	1.10042e+06		9	25.1111	76	1.90668	184.645	108.767	2.02871e+06
11	19.8182	97	1.47131	165.711	153.021	1.09782e+06		9	25.1111	76	1.90654	184.611	108.755	2.03899e+06
11	19.8182	97	1.47139	165.667	153.02	1.09851e+06		9	25.1111	76	1.90681	184.639	108.729	2.04073e+06
11	19.8182	97	1.47146	165.688	153.023	1.09704e+06		9	25.1111	76	1.90683	184.623	108.746	2.0431e+06
11	19.8182	97	1.47138	165.672	153.026	1.09607e+06		9	25.1111	76	1.90604	184.487	108.883	2.04795e+06
11	19.8182	97	1.47174	165.721	153.063	1.09642e+06		9	25.1111	76	1.90747	184.59	108.823	2.04889e+06
11	19.8182	97	1.47167	165.742	153.053	1.11074e+06		9	25.1111	76	1.90786	184.752	108.613	2.06661e+06
11	19.8182	97	1.47183	165.726	153.059	1.11192e+06		9	25.1111	76	1.90736	184.738	108.633	2.05083e+06
11	19.8182	97	1.47184	165.704	153.11	1.09732e+06		9	25.1111	76	1.90813	184.819	108.633	2.06894e+06
11	19.8182	97	1.47156	165.704	153.107	1.1143e+06		9	25.1111	76	1.90786	184.634	108.734	2.06263e+06
11	19.8182	97	1.47159	165.655	153.105	1.11463e+06		9	25.1111	76	1.90645	184.609	108.616	2.06281e+06
12	18.1667	84	1.47153	165.652	153.105	1.11219e+06		9	25.1111	76	1.90643	184.592	108.519	2.06299e+06
12	18.1667	84	1.47148	165.64	153.128	1.09915e+06		9	25.1111	76	1.90584	184.556	108.449	2.06095e+06
12	18.1667	84	1.47177	165.689	153.116	1.09256e+06		9	25.1111	76	1.90572	184.372	108.56	2.06889e+06
12	18.1667	84	1.47201	165.73	153.083	1.09792e+06		9	25.1111	76	1.90546	184.29	108.651	2.07233e+06
12	18.1667	84	1.47208	165.748	153.089	1.09699e+06		9	25.1111	76	1.90564	184.448	108.619	2.0649e+06
12	18.1667	84	1.47204	165.71	153.09	1.09597e+06		9	25.1111	76	1.906	184.463	108.611	2.06445e+06
12	18.1667	84	1.47204	165.71	153.09	1.09597e+06		9	25.1111	76	1.90662	184.519	108.602	2.05865e+06
11	19.8182	97	1.47194	165.813	153.076	1.0895e+06		9	25.1111	76	1.90692	184.378	108.703	2.05044e+06
12	18.1667	84	1.47237	165.837	153.098	1.09285e+06		9	25.1111	76	1.9066	184.277	108.75	2.05226e+06
11	19.8182	97	1.47249	165.9	153.086	1.09084e+06		9	25.1111	76	1.90608	184.359	108.675	2.06707e+06
11	19.8182	97	1.4724	165.905	153.087	1.09161e+06		9	25.1111	76	1.90593	184.399	108.688	2.07936e+06
11	19.8182	97	1.47225	165.921	153.087	1.09548e+06		9	25.1111	76	1.90667	184.742	108.498	2.03797e+06
11	19.8182	97	1.47228	165.899	153.097	1.09726e+06		9	25.1111	76	1.90693	184.78	108.488	2.06406e+06
11	19.8182	97	1.47219	165.869	153.097	1.09653e+06		9	25.1111	76	1.9069	184.77	108.545	2.04317e+06
11	19.8182	97	1.47217	165.885	153.113	1.09776e+06		9	25.1111	76	1.90788	184.75	108.697	2.04239e+06
11	19.8182	97	1.47226	165.894	153.1	1.09279e+06		9	25.1111	76	1.90771	184.675	108.654	2.03721e+06
11	19.8182	97	1.4721	165.858	153.115	1.09449e+06		9	25.1111	76	1.90715	184.569	108.74	2.04291e+06
11	19.8182	97	1.47197	165.804	153.101	1.08871e+06		9	25.1111	76	1.90725	184.716	108.685	2.05531e+06
11	19.8182	97	1.47197	165.794	153.07	1.09264e+06		9	25.1111	76	1.90724	184.617	108.745	2.06078e+06
11	19.8182	97	1.47183	165.807	153.061	1.09041e+06		9	25.1111	76	1.90698	184.517	108.796	2.05586e+06
11	19.8182	97	1.47161	165.802	153.079	1.09496e+06		9	25.1111	76	1.9068	184.669	108.703	2.06427e+06
11	19.8182	97	1.47148	165.675	153.087	1.09324e+06		9	25.1111	76	1.90658	184.72	108.68	2.05638e+06
11	19.8182	97	1.47155	165.719	153.084	1.09381e+06		9	25.1111	76	1.90676	184.582	108.819	2.04589e+06
11	19.8182	97	1.47151	165.771	153.062	1.09417e+06		9	25.1111	76	1.90598	184.319	109.039	2.02591e+06
11	19.8182	97	1.47171	165.74	153.084	1.09453e+06		9	25.1111	76	1.90633	184.515	108.849	2.04496e+06
11	19.8182	97	1.47239	165.787	153.011	1.09406e+06		9	25.1111	76	1.90595	184.589	108.788	2.03876e+06
11	19.8182	97	1.47241	165.817	152.989	1.0932e+06		9	25.1111	76	1.90661	184.633	108.749	2.03793e+06
11	19.8182	97	1.47268	166	152.97	1.09157e+06		9	25.1111	76	1.907	184.477	109	2.01454e+06
11	19.8182	97	1.47283	166.044	152.965	1.08921e+06		9	25.1111	76	1.90624	184.23	109.148	2.02566e+06
11	19.8182	97	1.47271	165.996	152.976	1.08636e+06		9	25.1111	76	1.90549	184.227	109.197	1.94856e+06
11	19.8182	97	1.473	166.031	152.976	1.07788e+06		9	25.1111	76	1.90579	184.188	109.195	1.95199e+06
11	19.8182	97	1.47274	166.013	152.978	1.07922e+06		9	25.1111	76	1.90593	184.26	109.149	2.0234e+06
11	19.8182	97	1.47292	166.036	153.006	1.08212e+06		9	25.1111	76	1.90562	184.276	109.096	1.99815e+06
11	19.8182	97	1.47251	165.94	152.996	1.08343e+06		9	25.1111	76	1.90622	184.331	109.064	1.99972e+06
11	19.8182	97	1.47275	165.98	153	1.0815e+06		9	25.1111	76	1.90518	184.187	109.141	2.03242e+06
11	19.8182	97	1.47257	165.965	153.006	1.07916e+06		9	25.1111	76	1.90544	184.153	109.094	2.01937e+06
11	19.8182	97	1.47265	165.971	152.999	1.08116e+06		9	25.1111	76	1.90506	184.391	108.857	2.03851e+06
12	18.0833	39	1.5178	165.071	109.258	2.21467e+06		9	25.1111	76	1.90065	183.327	109.477	1.93511e+06
12	18.0833	39	1.51763	165.05	109.31	2.2128e+06		9	25.1111	76	1.90043	183.351	109.303	2.02169e+06
12	18.0833	39	1.51721	165.031	109.275	2.23331e+06		9	25.1111	76	1.90015	183.358	109.365	2.0221e+06
12	18.0833	39	1.51716	164.961	109.375	2.21248e+06		9	25.1111	76	1.9004	183.332	109.374	2.02244e+06
12	18.0833	39	1.51721	164.947	109.438	2.20489e+06		9	25.1111	76	1.89987	183.478	109.322	2.02039e+06
12	18.0833	39	1.51709	164.924	109.421	2.25876e+06		9	25.1111	76	1.90008	183.29	109.462	1.93923e+06
12	18.1667	40	1.51705	164.91	109.43	2.26359e+06		9	25.1111	76	1.90006	183.231	109.508	2.03321e+06
12	18.1667	40	1.51709	164.969	109.378	2.26147e+06		9	25.1111	76	1.90035	183.241	109.511	2.05213e+06
12	18.1667	40	1.51699	164.933	109.44	2.26385e+06		9	25.1111	76	1.89916	183.219	109.452	1.97139e+06
12	18.0833	39	1.517	164.98	109.414	2.22255e+06		9	25.1111	76	1.89956	183.243	109.457	1.9522e+06
12	18.1667	40	1.51674	164.919	109.371	2.25957e+06		9	25.1111	76	1.90009	183.485	109.354	1.9122e+06
12	18.0833	39	1.51655	164.844	109.478	2.23607e+06		9	25.1111	76	1.90033	183.582	109.429	1.98187e+06
12	18.0833	39	1.51673	164.801	109.537	2.27645e+06		9	25.1111	76	1.90196	183.797	109.363	2.02775e+06
12	18.1667	40	1.51699	164.753	109.582	2.27931e+06		9	25.1111	76	1.90148	183.776	109.35	2.02047e+06
12	18.1667	40	1.51717	164.84	109.432	2.27707e+06		8	28.25	76	1.9015	183.752	109.354	2.02453e+06
12	18.1667	40	1.51702	164.912	109.336	2.27007e+06		9	25.1111	76	1.90156	183.584	109.524	2.04421e+06
12	18.1667	40	1.51707	164.84	109.328	2.27235e+06		9	25.1111	76	1.90175	183.641	109.482	2.02067e+06
12	18.1667	40	1.51741	164.761	109.488	2.27653e+06		9	25.1111	76	1.90131	183.598	109.459	2.0201e+06
12	18.1667	40	1.51748	164.787	109.464	2.27433e+06		9	25.1111	76	1.90206	183.789	109.388	2.01016e+06
12	18.1667	40	1.51753	164.776	109.512	2.27615e+06		9	25.1111	76	1.90221	183.83	109.417	1.98188e+06
12	18.1667	40	1.51757	164.754	109.489	2.28217e+06		9	25.1111	76	1.90311	183.894	109.32	1.97903e+06
12	18.1667	40	1.51733	164.778	109.517	2.28141e+06		9	25.1111	76	1.90394	184.006	109.343	1.99591e+06
12	18.1667	40	1.51771	164.825	109.484	2.27929e+06		9	25.1111	76	1.90369	184.127	109.071	2.00288e+06
12	18.1667	40	1.51775	164.854	109.459	2.28224e+06		9	25.1111	76	1.90374	184.123	109.034	2.02247e+06
12	18.1667	40	1.51785	164.854	109.408	2.31005e+06		9	25.1111	76	1.90364	184.122	109.141	1.99547e+06
12	18.1667	40	1.51776	164.853	109.432	2.3191e+06		9	25.1111	76	1.90438	184.109	109.333	1.99787e+06
12	18.1667	40	1.51773	164.87	109.39	2.31876e+06		9	25.1111	76	1.90364	184.028	109.265	1.99697e+06
12	18.1667	40	1.51772	164.857	109.447	2.31473e+06		9	25.1111	76	1.90429	184.007	109.164	2e+06
12	18.1667	40	1.51729	164.751	109.517	2.32966e+06		9	25.1111	76	1.90533	184.285	109.084	1.98981e+06
12	18.1667	40	1.51715	164.773	109.543	2.29698e+06		9	25.1111	76	1.90526	184.334	109.103	1.98576e+06
12	18.1667	40	1.51724	164.79	109.522	2.2953e+06		9	25.1111	76	1.90555	184.3	109.107	1.98737e+06
12	18.1667	40	1.51728	164.719	109.555	2.2896e+06		9	25.1111	76	1.90506	184.139	109.206	2.0012e+06
12	18.1667	40	1.51714	164.809	109.518	2.28635e+06		9	25.1111	76	1.90486	184.149	109.221	1.99129e+06
12	18.1667	40	1.51731	164.859	109.478	2.28012e+06		9	25.1111	76	1.90501	184.067	109.246	1.9867e+06
12	18.1667	40	1.51744	164.872	109.478	2.29024e+06		9	25.1111	76	1.90501	184.067	109.246	1.9867e+06
12	18.1667	40	1.5176	164.886	109.446	2.28297e+06		9	25.1111	76	1.90445	184.097	109.197	1.99283e+06
12	18.1667	40	1.5176	164.872	109.478	2.28234e+06		9	25.1111	76	1.90398	184.14	109.11	1.99454e+06
12	18.1667	40	1.51767	164.873	109.625	2.28413e+06		9	25.1111	76	1.90472	184.146	109.11	1.99748e+06
12	18.1667	40	1.51768	164.853	109.615	2.28712e+06		9	25.1111	76	1.90496	184.046	109.286	1.99547e+06
12	18.1667	40	1.51782	164.863	109.646	2.28824e+06		9	25.1111	76	1.90536	184.211	109.18	2.0101e+06
12	18.1667	40	1.51756	164.835	109.671	2.28636e+06		9	25.1111	76	1.90576	184.275	109.079	2.00695e+06
12	18.1667	40	1.51748	164.875	109.651	2.28854e+06		9	25.1111	76	1.90566	184.166	109.108	2.00272e+06
12	18.1667	40	1.51744	164.907	109.674	2.2859e+06		9	25.1111	76	1.90619	184.373	108.962	2.00354e+06
12	18.1667	40	1.51761	164.926	109.686	2.29591e+06		9	25.1111	76	1.90642	184.394	108.988	2.00711e+06
12	18.1667	40	1.51752	164.969	109.639	2.29329e+06		9	25.1111	76	1.90591	184.556	108.813	2.00135e+06
12	18.1667	40	1.51808	164.984	109.627	2.27765e+06		9	25.1111	76	1.90573	184.43	108.886	2.05968e+06
12	18.1667	40	1.51815	164.988	109.62	2.29185e+06		9	25.1111	76	1.9056	184.522	108.867	2.0575e+06
12	18.1667	40	1.51806	165.029	109.609	2.29454e+06		9	25.1111	76	1.90487	184.435	108.871	2.00373e+06
12	18.1667	40	1.51782	164.962	109.655	2.29305e+06		9	25.1111	76	1.90491	184.518	108.837	2.00249e+06
12	18.1667	40	1.51787	164.997	109.585	2.28929e+06		9	25.1111	76	1.90565	184.674	108.725	1.98362e+06
12	18.1667	40	1.51768	164.971	109.623	2.28883e+06		9	25.1111	76	1.90645	184.679	108.742	2.03426e+06
12	18.1667	40	1.5177	164.995	109.6	2.29376e+06		9	25.1111	76	1.90613	184.579	108.82	2.03864e+06
12	18.1667	40	1.51766	164.935	109.618	2.29535e+06		9	25.1111	76	1.90668	184.645	108.767	2.02871e+06
12	18.1667	40	1.5178	164.975	109.586	2.2912e+06		9	25.1111	76	1.90654	184.611	108.755	2.03899e+06
12	18.1667	40	1.51749	164.916	109.632	2.29372e+06		9	25.1111	76	1.90681	184.639	108.729	2.04073e+06
12	18.1667	40	1.51749	164.878	109.61	2.29198e+06		9	25.1111	76	1.90683	184.623	108.746	2.0431e+06
12	18.1667	40	1.51758	164.905	109.633	2.29408e+06		9	25.1111	76	1.90604	184.487	108.883	2.04795e+06
12	18.1667	40	1.51767	164.958	109.619	2.29465e+06		9	25.1111	76	1.90747	184.59	108.823	2.04889e+06
12	18.1667	40	1.51709	165	109.555	2.28117e+06		9	25.1111	76	1.90786	184.752	108.613	2.06661e+06
12	18.1667	40	1.51684	164.923	109.578	2.28303e+06		9	25.1111	76	1.90736	184.738	108.633	2.05083e+06
12	18.1667	40	1.51703	164.921	109.6	2.29128e+06		9	25.1111	76	1.90813	184.819	108.633	2.06894e+06
12	18.1667	40	1.51718	164.934	109.598	2.29686e+06		9	25.1111	76	1.90786	184.634	108.734	2.06263e+06
12	18.1667	40	1.51716	164.952	109.572	2.28065e+06		9	25.1111	76	1.90645	184.609	108.616	2.06281e+06
12	18.1667	40	1.51684	164.889	109.514	2.28487e+06		9	25.1111	76	1.90643	184.592	108.519	2.06299e+06
12	18.1667	40	1.51677	164.855	109.56	2.29095e+06		9	25.1111	76	1.90584	184.556	108.449	2.06095e+06
12	18.1667	40	1.51689	164.811	109.602	2.30334e+06		9	25.1111	76	1.90572	184.372	108.56	2.06889e+06
12	18.1667	40	1.51679	164.84	109.599	2.29972e+06		9	25.1111	76	1.90546	184.29	108.651	2.07233e+06
12	18.1667	40	1.517	164.876	109.624	2.3045e+06		9	25.1111	76	1.90564	184.448	108.619	2.0649e+06
12	18.1667	40	1.51686	164.904	109.589	2.29929e+06		9	25.1111	76	1.906	184.463	108.611	2.06445e+06
12	18.1667	40	1.51691	164.959	109.539	2.29628e+06		9	25.1111	76	1.90662	184.519	108.602	2.05865e+06
12	18.1667	40	1.51672	164.958	109.541	2.29538e+06		9	25.1111	76	1.90692	184.378	108.703	2.05044e+06
12	18.1667	40	1.5168	164.916	109.579	2.30154e+06		9	25.1111	76	1.9066	184.277	108.75	2.05226e+06
12	18.1667	40	1.51704	164.866	109.645	2.3029e+06		9	25.1111	76	1.90608	184.359	108.675	2.06707e+06
12	18.1667	40	1.51719	164.879	109.632	2.30274e+06		9	25.1111	76	1.90593	184.399	108.688	2.07936e+06
12	18.1667	40	1.51746	164.875	109.668	2.30258e+06		9	25.1111	76	1.90667	184.742	108.498	2.03797e+06
12	18.1667	40	1.51755	164.971	109.601	2.29604e+06		9	25.1111	76	1.90693	184.78	108.488	2.06406e+06
12	18.1667	40	1.51758	164.956	109.615	2.29894e+06		9	25.1111	76	1.9069	184.77	108.545	2.04317e+06
12	18.1667	40	1.51757	164.927	109.652	2.29695e+06		9	25.1111	76	1.90788	184.75	108.697	2.04239e+06
12	18.1667	40	1.51744	164.906	109.631	2.29978e+06		9	25.1111	76	1.90771	184.675	108.654	2.03721e+06
12	18.1667	40	1.51738	164.916	109.647	2.30051e+06		9	25.1111	76	1.90715	184.569	108.74	2.04291e+06
12	18.1667	40	1.51763	164.968	109.578	2.29904e+06		9	25.1111	76	1.90725	184.716	108.685	2.05531e+06
12	18.1667	40	1.51765	165.011	109.635	2.30765e+06		9	25.1111	76	1.90724	184.617	108.745	2.06078e+06
12	18.1667	40	1.51764	165.045	109.587	2.3052e+06		9	25.1111	76	1.90698	184.517	108.796	2.05586e+06
12	18.1667	40	1.51792	165.041	109.553	2.29083e+06		9	25.1111	76	1.9068	184.669	108.703	2.06427e+06
12	18.1667	40	1.51765	164.949	109.638	2.29445e+06		9	25.1111	76	1.90658	184.72	108.68	2.05638e+06
12	18.1667	40	1.5177	164.986	109.591	2.29573e+06		9	25.1111	76	1.90676	184.582	108.819	2.04589e+06
12	18.1667	40	1.51776	164.992	109.612	2.2933e+06		9	25.1111	76	1.90598	184.319	109.039	2.02591e+06
12	18.1667	40	1.51778	164.99	109.533	2.28048e+06		9	25.1111	76	1.90633	184.515	108.849	2.04496e+06
12	18.1667	40	1.51805	164.983	109.538	2.28608e+06		9	25.1111	76	1.90595	184.589	108.788	2.03876e+06
12	18.1667	40	1.51754	165.005	109.524	2.28542e+06		9	25.1111	76	1.90661	184.633	108.749	2.03793e+06
12	18.1667	40	1.51743	165.003	109.503	2.2847e+06		9	25.1111	76	1.907	184.477	109	2.01454e+06
12	18.1667	40	1.51743	164.869	109.575	2.29102e+06		9	25.1111	76	1.90624	184.23	109.148	2.02566e+06
12	18.1667	40	1.51755	164.924	109.567	2.2874e+06		9	25.1111	76	1.90549	184.227	109.197	1.94856e+06
12	18.1667	40	1.51746	164.881	109.632	2.30259e+06		9	25.1111	76	1.90579	184.188	109.195	1.95199e+06
12	18.1667	40	1.5176	164.937	109.598	2.29786e+06		9	25.1111	76	1.90593	184.26	109.149	2.0234e+06
12	18.1667	40	1.51713	164.934	109.624	2.29976e+06		9	25.1111	76	1.90562	184.276	109.096	1.99815e+06
12	18.1667	40	1.51683	164.907	109.664	2.29967e+06		9	25.1111	76	1.90622	184.331	109.064	1.99972e+06
12	18.1667	40	1.51714	165.014	109.574	2.2852e+06		9	25.1111	76	1.90518	184.187	109.141	2.03242e+06
12	18.1667	40	1.51689	165.039	109.574	2.28318e+06		9	25.1111	76	1.90544	184.153	109.094	2.01937e+06
12	18.1667	40	1.51667	165.02	109.567	2.27962e+06		9	25.1111	76	1.90506	184.391	108.857	2.03851e+06
14	15.4286	42	1.50395	160.019	111.197	2.34715e+06		15	15.0667	38	1.68216	142.345	158.66	2.27912e+06
13	16.6154	57	1.50422	160.027	111.186	2.34613e+06		15	15.0667	38	1.68219	142.336	158.652	2.27993e+06
14	15.4286	42	1.50415	160.024	111.191	2.34144e+06		15	15.0667	38	1.68223	142.366	158.604	2.27018e+06
14	15.4286	42	1.50384	160.033	111.23	2.34922e+06		15	15.0667	38	1.68218	142.414	158.599	2.27294e+06
14	15.4286	42	1.50369	160.006	111.232	2.34989e+06		15	15.0667	38	1.68231	142.412	158.596	2.26956e+06
14	15.4286	42	1.50369	160.025	111.203	2.34622e+06		15	15.0667	38	1.68245	142.391	158.596	2.27661e+06
14	15.4286	42	1.50351	160.056	111.185	2.351e+06		15	15.0667	38	1.68256	142.424	158.581	2.2755e+06
14	15.4286	42	1.50353	160.059	111.189	2.34786e+06		15	15.0667	38	1.68239	142.41	158.576	2.2706e+06
14	15.4286	42	1.50359	160.05	111.197	2.3428e+06		15	15.0667	38	1.68254	142.421	158.567	2.26983e+06
14	15.4286	42	1.50364	160.03	111.157	2.34507e+06		15	15.0667	38	1.68231	142.378	158.583	2.27098e+06
14	15.4286	42	1.50336	160.013	111.178	2.37011e+06		15	15.0667	38	1.68239	142.28	158.615	2.34672e+06
14	15.4286	42	1.50345	159.995	111.225	2.3652e+06		15	15.0667	38	1.68257	142.293	158.616	2.34705e+06
14	15.4286	42	1.50326	159.919	111.254	2.34364e+06		15	15.0667	38	1.68245	142.306	158.614	2.34703e+06
15	14.4	42	1.5032	160.036	111.176	2.36571e+06		15	15.0667	38	1.68236	142.335	158.61	2.34665e+06
15	14.4	42	1.50353	160.026	111.196	2.37062e+06		15	15.0667	38	1.68238	142.315	158.617	2.34617e+06
15	14.4	42	1.50343	159.971	111.229	2.37424e+06		15	15.0667	38	1.68228	142.284	158.636	2.34873e+06
15	14.4	42	1.50342	159.971	111.216	2.40191e+06		15	15.0667	38	1.68233	142.315	158.636	2.34419e+06
15	14.4	42	1.50318	159.974	111.203	2.3652e+06		15	15.0667	38	1.68227	142.283	158.646	2.34917e+06
15	14.4	42	1.50276	159.997	111.185	2.36809e+06		15	15.0667	38	1.68229	142.302	158.646	2.3494e+06
15	14.4	42	1.50274	159.979	111.166	2.3703e+06		15	15.0667	38	1.68221	142.274	158.65	2.35049e+06
15	14.4	42	1.50249	159.94	111.14	2.37283e+06		15	15.0667	38	1.68228	142.327	158.656	2.3552e+06
15	14.4	42	1.50241	159.913	111.112	2.37596e+06		15	15.0667	38	1.68238	142.318	158.654	2.35925e+06
15	14.4	42	1.50259	159.974	111.089	2.37019e+06		15	15.0667	38	1.68243	142.299	158.659	2.36061e+06
14	15.4286	42	1.50291	159.96	111.104	2.37771e+06		15	15.0667	38	1.68249	142.301	158.655	2.35996e+06
14	15.4286	42	1.50279	160.009	111.123	2.37079e+06		15	15.0667	38	1.68267	142.29	158.657	2.359e+06
14	15.4286	42	1.5027	159.96	111.157	2.37084e+06		15	15.0667	38	1.68269	142.292	158.657	2.35846e+06
14	15.4286	42	1.50244	159.997	111.19	2.37224e+06		15	15.0667	38	1.68261	142.296	158.661	2.3583e+06
14	15.4286	42	1.50243	159.998	111.157	2.36878e+06		15	15.0667	38	1.68273	142.286	158.665	2.35907e+06
14	15.4286	42	1.50215	160.001	111.146	2.36867e+06		15	15.0667	38	1.68284	142.328	158.638	2.35666e+06
14	15.4286	42	1.50234	159.981	111.15	2.37184e+06		15	15.0667	38	1.68292	142.323	158.631	2.35787e+06
14	15.4286	42	1.50243	159.946	111.155	2.379e+06		15	15.0667	38	1.68291	142.33	158.615	2.35955e+06
14	15.4286	42	1.50224	160.02	111.155	2.37091e+06		15	15.0667	38	1.68322	142.357	158.625	2.3543e+06
14	15.4286	42	1.50224	160.009	111.164	2.39184e+06		15	15.0667	38	1.68332	142.409	158.578	2.35309e+06
14	15.4286	42	1.50249	160.038	111.164	2.42044e+06		15	15.0667	38	1.68333	142.401	158.571	2.35324e+06
14	15.4286	42	1.50228	160.028	111.168	2.42885e+06		15	15.0667	38	1.68328	142.397	158.557	2.35348e+06
14	15.4286	42	1.50229	160.009	111.133	2.41042e+06		15	15.0667	38	1.68337	142.402	158.559	2.35438e+06
14	15.4286	42	1.50258	159.993	111.166	2.41376e+06		15	15.0667	38	1.68347	142.419	158.558	2.35292e+06
14	15.4286	42	1.50278	160.036	111.136	2.42116e+06		15	15.0667	38	1.68361	142.416	158.549	2.35382e+06
14	15.4286	42	1.50271	159.952	111.18	2.4267e+06		15	15.0667	38	1.68358	142.387	158.566	2.35269e+06
14	15.4286	42	1.50277	159.962	111.158	2.43062e+06		15	15.0667	38	1.6838	142.378	158.565	2.35167e+06
14	15.4286	42	1.50292	160.028	111.139	2.42463e+06		15	15.0667	38	1.6838	142.385	158.566	2.35097e+06
14	15.4286	42	1.50292	160.006	111.169	2.41261e+06		15	15.0667	38	1.68391	142.408	158.555	2.33486e+06
15	14.4	42	1.50294	160.014	111.178	2.41679e+06		15	15.0667	38	1.6837	142.409	158.563	2.33709e+06
14	15.4286	42	1.5025	159.946	111.196	2.42459e+06		15	15.0667	38	1.68354	142.393	158.57	2.33741e+06
14	15.4286	42	1.50213	159.991	111.201	2.43501e+06		15	15.0667	38	1.68351	142.398	158.57	2.33524e+06
14	15.4286	42	1.50253	160.05	111.176	2.43499e+06		15	15.0667	38	1.68347	142.418	158.562	2.33564e+06
14	15.4286	42	1.5026	160.028	111.152	2.43137e+06		15	15.0667	38	1.68366	142.434	158.562	2.33554e+06
14	15.4286	42	1.5023	160.028	111.147	2.42892e+06		15	15.0667	38	1.68354	142.42	158.565	2.33511e+06
14	15.4286	42	1.50237	160.049	111.134	2.42097e+06		15	15.0667	38	1.68368	142.403	158.569	2.34184e+06
14	15.4286	42	1.50243	160.097	111.106	2.3814e+06		15	15.0667	38	1.68348	142.387	158.574	2.34419e+06
14	15.4286	42	1.50279	160.109	111.088	2.38206e+06		15	15.0667	38	1.68374	142.373	158.579	2.34321e+06
15	14.4	42	1.50273	160.064	111.099	2.38408e+06		15	15.0667	38	1.68381	142.381	158.577	2.35205e+06
15	14.4	42	1.50314	160.037	111.103	2.38875e+06		15	15.0667	38	1.68364	142.37	158.576	2.35233e+06
15	14.4	42	1.50348	160.062	111.081	2.37785e+06		15	15.0667	38	1.68348	142.275	158.62	2.36524e+06
15	14.4	42	1.5036	160.06	111.06	2.37626e+06		15	15.0667	38	1.68333	142.236	158.634	2.36455e+06
15	14.4	42	1.50387	160.088	111.068	2.37476e+06		15	15.0667	38	1.68324	142.251	158.634	2.36599e+06
15	14.4	42	1.50379	160.09	111.079	2.37976e+06		15	15.0667	38	1.68335	142.267	158.635	2.34146e+06
15	14.4	42	1.50393	160.119	111.085	2.38123e+06		15	15.0667	38	1.68336	142.267	158.638	2.36264e+06
15	14.4	42	1.50406	160.082	111.068	2.38148e+06		15	15.0667	38	1.68318	142.241	158.652	2.35558e+06
14	15.4286	42	1.50422	160.092	111.095	2.38876e+06		15	15.0667	38	1.6832	142.256	158.647	2.3645e+06
15	14.4	42	1.50442	160.092	111.093	2.38952e+06		15	15.0667	38	1.68318	142.251	158.657	2.36465e+06
15	14.4	42	1.50432	160.016	111.11	2.39301e+06		15	15.0667	38	1.68321	142.262	158.66	2.35542e+06
15	14.4	42	1.50432	160.034	111.076	2.39137e+06		15	15.0667	38	1.68351	142.295	158.654	2.3527e+06
15	14.4	42	1.50454	160.002	111.109	2.39539e+06		15	15.0667	38	1.68324	142.316	158.646	2.35343e+06
15	14.4	42	1.50447	159.973	111.106	2.4286e+06		15	15.0667	38	1.68333	142.315	158.642	2.35441e+06
15	14.4	42	1.50465	160.036	111.079	2.38877e+06		15	15.0667	38	1.68365	142.316	158.632	2.35403e+06
14	15.4286	42	1.50458	159.979	111.076	2.39091e+06		15	15.0667	38	1.68351	142.291	158.634	2.35357e+06
14	15.4286	42	1.50464	159.973	111.073	2.39103e+06		15	15.0667	38	1.68376	142.301	158.631	2.35273e+06
14	15.4286	42	1.50464	160.028	111.011	2.38672e+06		15	15.0667	38	1.68376	142.301	158.631	2.35273e+06
14	15.4286	42	1.50468	159.985	111.033	2.38624e+06		15	15.0667	38	1.68374	142.291	158.652	2.35332e+06
14	15.4286	42	1.50456	159.963	111.046	2.39029e+06		15	15.0667	38	1.68375	142.257	158.657	2.35599e+06
14	15.4286	42	1.50496	160.025	111.036	2.38809e+06		15	15.0667	38	1.6836	142.299	158.645	2.35599e+06
14	15.4286	42	1.50533	160	111.058	2.39661e+06		15	15.0667	38	1.68345	142.245	158.663	2.35813e+06
14	15.4286	42	1.50514	160.002	111.046	2.39583e+06		15	15.0667	38	1.6835	142.224	158.678	2.35652e+06
14	15.4286	42	1.5053	160.05	111.047	2.39544e+06		15	15.0667	38	1.68334	142.205	158.693	2.36024e+06
14	15.4286	42	1.50521	160.107	111.006	2.39074e+06		15	15.0667	38	1.68321	142.218	158.694	2.36082e+06
14	15.4286	42	1.50509	160.092	110.996	2.38738e+06		15	15.0667	38	1.68319	142.183	158.693	2.37321e+06
14	15.4286	42	1.50491	160.099	110.987	2.38705e+06		15	15.0667	38	1.68341	142.215	158.696	2.37608e+06
14	15.4286	42	1.50454	160.027	111.028	2.39853e+06		15	15.0667	38	1.68346	142.198	158.7	2.37503e+06
14	15.4286	42	1.50473	160.144	110.985	2.39175e+06		15	15.0667	38	1.68347	142.197	158.699	2.3812e+06
14	15.4286	42	1.50485	160.143	110.96	2.3916e+06		15	15.0667	38	1.68345	142.185	158.7	2.37913e+06
14	15.4286	42	1.50462	160.157	110.963	2.39716e+06		15	15.0667	38	1.68337	142.141	158.719	2.38032e+06
14	15.4286	42	1.50441	160.185	110.908	2.38026e+06		15	15.0667	38	1.68364	142.129	158.726	2.3784e+06
14	15.4286	42	1.5047	160.176	110.93	2.3815e+06		15	15.0667	38	1.68363	142.152	158.726	2.36681e+06
14	15.4286	42	1.5044	160.188	110.924	2.37933e+06		15	15.0667	38	1.68368	142.156	158.714	2.37213e+06
14	15.4286	42	1.50432	160.243	110.896	2.37997e+06		15	15.0667	38	1.68371	142.2	158.7	2.37188e+06
14	15.4286	42	1.50422	160.295	110.829	2.38271e+06		15	15.0667	38	1.68378	142.182	158.73	2.37472e+06
14	15.4286	42	1.50417	160.321	110.805	2.38057e+06		15	15.0667	38	1.68357	142.194	158.733	2.3821e+06
14	15.4286	42	1.50418	160.336	110.831	2.36826e+06		15	15.0667	38	1.6839	142.218	158.717	2.37945e+06
14	15.4286	42	1.50422	160.348	110.831	2.3987e+06		15	15.0667	38	1.68422	142.226	158.723	2.3766e+06
13	16.6154	57	1.50436	160.366	110.837	2.39676e+06		15	15.0667	38	1.68441	142.248	158.709	2.3811e+06
13	16.6154	57	1.50424	160.344	110.843	2.39999e+06		15	15.0667	38	1.68417	142.236	158.734	2.38189e+06
13	16.6154	57	1.50424	160.351	110.826	2.39969e+06		15	15.0667	38	1.68423	142.27	158.722	2.31812e+06
13	16.6154	57	1.50414	160.347	110.839	2.39919e+06		15	15.0667	38	1.68419	142.264	158.718	2.3829e+06
13	16.6154	57	1.50407	160.344	110.855	2.3628e+06		15	15.0667	38	1.6843	142.26	158.712	2.38375e+06
13	16.6154	57	1.50417	160.333	110.862	2.36426e+06		15	15.0667	38	1.68436	142.245	158.705	2.38067e+06
13	16.6154	57	1.50416	160.339	110.856	2.36068e+06		15	15.0667	38	1.68431	142.268	158.693	2.38043e+06
13	16.6154	57	1.50422	160.303	110.879	2.37564e+06		15	15.0667	38	1.68454	142.31	158.686	2.37718e+06
13	16.6154	57	1.50432	160.314	110.869	2.37242e+06		15	15.0667	38	1.68438	142.271	158.707	2.3803e+06
13	16.6154	57	1.5043	160.347	110.874	2.37495e+06		15	15.0667	38	1.6842	142.282	158.704	2.37999e+06
5	44	72	1.88067	221.92	70.2233	1.05333e+06		9	25.2222	140	1.85694	214.952	87.4791	1.28305e+06
5	44	72	1.88058	221.804	70.2999	1.05819e+06		9	25.2222	140	1.85779	214.834	87.504	1.28704e+06
5	44	72	1.88118	222.081	70.2098	1.04874e+06		9	25.2222	140	1.85805	214.676	87.507	1.28379e+06
5	44	72	1.88165	222.145	70.1823	1.04722e+06		9	25.2222	140	1.85809	214.699	87.4958	1.28015e+06
5	44	72	1.88158	222.169	70.1677	1.04663e+06		9	25.2222	140	1.85855	214.826	87.4752	1.27856e+06
5	44	72	1.88204	222.091	70.1868	1.04631e+06		9	25.2222	140	1.85828	214.771	87.494	1.27991e+06
5	44	72	1.88223	222.104	70.1928	1.04624e+06		9	25.2222	140	1.85825	214.713	87.5148	1.28132e+06
5	44	72	1.88238	221.948	70.2463	1.04826e+06		9	25.2222	140	1.85836	214.691	87.538	1.28444e+06
5	44	72	1.88195	222	70.2291	1.04472e+06		9	25.2222	140	1.85868	214.592	87.547	1.2865e+06
5	44	72	1.88198	222.069	70.2164	1.04623e+06		9	25.2222	140	1.85892	214.666	87.5437	1.28534e+06
5	44	72	1.88178	222.102	70.2076	1.05103e+06		9	25.2222	140	1.85892	214.666	87.5437	1.28534e+06
5	44	72	1.88131	222.053	70.2354	1.05125e+06		9	25.2222	140	1.85885	214.629	87.5781	1.29051e+06
5	44	72	1.88197	222.085	70.2056	1.04975e+06		9	25.2222	140	1.8592	214.721	87.5714	1.29006e+06
5	43.8	72	1.88161	222.23	70.1746	1.04452e+06		9	25.2222	140	1.8588	214.944	87.5203	1.28511e+06
5	43.8	72	1.88161	222.22	70.1781	1.04497e+06		9	25.2222	140	1.85856	215.002	87.5118	1.28004e+06
5	43.8	72	1.88196	222.207	70.1738	1.0477e+06		9	25.2222	140	1.85823	214.943	87.4996	1.27649e+06
5	43.8	72	1.88297	222.202	70.1956	1.04838e+06		9	25.2222	140	1.85825	214.936	87.5248	1.27973e+06
5	44	72	1.88348	222.309	70.177	1.04733e+06		9	25.2222	140	1.85861	214.981	87.4989	1.2758e+06
5	44	72	1.88327	222.265	70.1889	1.04773e+06		9	25.2222	140	1.85857	215.12	87.4949	1.27386e+06
5	44	72	1.88298	222.061	70.2644	1.05197e+06		9	25.2222	140	1.85871	215.33	87.4427	1.26542e+06
4	55	106	1.88333	222.111	70.2704	1.05191e+06		9	25.2222	140	1.85893	215.377	87.4412	1.2641e+06
5	44	72	1.88287	222.12	70.2667	1.05199e+06		9	25.2222	140	1.85895	215.349	87.4164	1.26248e+06
5	44	72	1.88194	222.145	70.2246	1.0508e+06		9	25.2222	140	1.85888	215.07	87.4672	1.27233e+06
4	55	106	1.88246	222.13	70.2439	1.05179e+06		9	25.2222	140	1.85909	215.058	87.4841	1.27174e+06
5	44	72	1.88254	222.042	70.2702	1.0531e+06		9	25.2222	140	1.85904	214.881	87.5199	1.27962e+06
5	44	72	1.88227	221.971	70.2804	1.05449e+06		9	25.2222	140	1.85887	214.981	87.4885	1.27275e+06
5	44	72	1.88205	222.025	70.2481	1.05495e+06		9	25.2222	140	1.85904	215.026	87.4626	1.27082e+06
5	44	72	1.8821	221.967	70.272	1.05417e+06		9	25.2222	140	1.85914	215.007	87.4327	1.26617e+06
5	44	72	1.88224	221.99	70.2551	1.04721e+06		9	25.2222	140	1.85873	215.189	87.4083	1.25937e+06
5	44	72	1.88295	221.896	70.3189	1.04473e+06		9	25.2222	140	1.85921	215.32	87.3906	1.25398e+06
5	44	72	1.88258	221.789	70.3357	1.04794e+06		9	25.2222	140	1.85905	215.305	87.4113	1.25725e+06
5	44	72	1.88215	221.905	70.3134	1.04343e+06		9	25.2222	140	1.85911	215.432	87.3838	1.25471e+06
5	44	72	1.88196	221.813	70.3093	1.04496e+06		9	25.2222	140	1.85903	215.296	87.3978	1.25871e+06
5	44	72	1.88123	221.811	70.3216	1.04522e+06		9	25.2222	140	1.85865	215.247	87.4072	1.26206e+06
5	44	72	1.88082	221.791	70.3184	1.04383e+06		9	25.2222	140	1.85855	215.292	87.4209	1.2691e+06
4	55	91	1.88209	221.796	70.3477	1.04408e+06		9	25.2222	140	1.85784	215.313	87.4155	1.267e+06
5	44	72	1.8817	221.734	70.3859	1.04152e+06		9	25.2222	140	1.8578	215.323	87.3988	1.26618e+06
5	44	72	1.88074	221.549	70.4595	1.04582e+06		9	25.2222	140	1.85747	215.198	87.4411	1.27077e+06
5	44	72	1.88058	221.765	70.386	1.04676e+06		9	25.2222	140	1.85751	215.282	87.4024	1.26615e+06
5	44	84	1.87993	221.754	70.412	1.04325e+06		9	25.2222	140	1.85786	215.351	87.3942	1.26786e+06
5	44	84	1.87974	221.753	70.4112	1.04437e+06		9	25.2222	140	1.85814	215.128	87.4238	1.27475e+06
6	36.6667	72	1.88032	221.777	70.4123	1.04388e+06		9	25.2222	140	1.85793	215.177	87.4173	1.27149e+06
5	44	84	1.88021	221.713	70.4156	1.04856e+06		9	25.2222	140	1.85789	215.226	87.4236	1.26797e+06
5	44	84	1.87992	221.668	70.4285	1.04971e+06		9	25.2222	140	1.85813	215.324	87.4153	1.27055e+06
5	44	84	1.87995	221.742	70.4318	1.04547e+06		9	25.2222	140	1.85857	215.473	87.3888	1.2667e+06
5	44	84	1.88088	221.806	70.4059	1.04528e+06		9	25.2222	140	1.85836	215.487	87.409	1.26987e+06
4	54.75	90	1.88028	221.748	70.4198	1.04211e+06		9	25.2222	140	1.85847	215.355	87.4308	1.27409e+06
5	44	84	1.87979	221.682	70.4331	1.0445e+06		9	25.2222	140	1.85899	215.36	87.4645	1.27959e+06
5	44	84	1.87975	221.552	70.487	1.04261e+06		9	25.2222	140	1.85907	215.38	87.4558	1.27877e+06
5	44	84	1.87912	221.486	70.5096	1.0385e+06		9	25.2222	140	1.85941	215.407	87.4608	1.27211e+06
5	44	84	1.87927	221.575	70.4933	1.04632e+06		9	25.2222	140	1.85942	215.349	87.4582	1.27248e+06
5	44	84	1.87976	221.655	70.4521	1.04455e+06		9	25.2222	140	1.8593	215.333	87.4574	1.27202e+06
5	44	84	1.88043	221.633	70.4753	1.03804e+06		9	25.2222	140	1.85938	215.322	87.4418	1.26694e+06
5	44	84	1.88065	221.619	70.4927	1.03989e+06		9	25.2222	140	1.85915	215.305	87.4448	1.2663e+06
5	44	84	1.8805	221.621	70.4807	1.04608e+06		9	25.2222	140	1.85858	215.256	87.4606	1.26519e+06
5	44	84	1.88107	221.697	70.4551	1.04582e+06		9	25.2222	140	1.8583	215.217	87.4496	1.2688e+06
5	43.8	83	1.88028	221.694	70.4498	1.04142e+06		9	25.2222	140	1.8582	215.217	87.4446	1.26867e+06
5	43.8	83	1.88052	221.674	70.4529	1.04479e+06		9	25.2222	140	1.85858	215.37	87.4064	1.26011e+06
4	55	106	1.8808	221.624	70.4593	1.04225e+06		9	25.2222	140	1.85861	215.437	87.3909	1.25656e+06
4	55	106	1.88118	221.658	70.4481	1.04314e+06		9	25.2222	140	1.85814	215.487	87.4123	1.25853e+06
4	55	106	1.88143	221.913	70.3725	1.03791e+06		9	25.2222	140	1.85828	215.477	87.4171	1.26208e+06
4	55	106	1.8812	221.979	70.3664	1.03694e+06		9	25.2222	140	1.85837	215.44	87.4358	1.26362e+06
4	55	106	1.88222	221.849	70.4289	1.03945e+06		9	25.2222	140	1.85811	215.466	87.4361	1.2627e+06
4	55	106	1.88235	221.889	70.4199	1.03754e+06		9	25.2222	140	1.85764	215.427	87.4486	1.26227e+06
4	55	106	1.88171	221.83	70.4352	1.03827e+06		9	25.2222	140	1.85773	215.397	87.4463	1.26065e+06
4	54.75	106	1.8813	221.687	70.4689	1.0381e+06		9	25.2222	140	1.85777	215.415	87.4331	1.26111e+06
4	54.75	106	1.88014	221.66	70.4707	1.03763e+06		9	25.2222	140	1.85793	215.392	87.4364	1.26097e+06
4	54.75	106	1.88044	221.73	70.4474	1.0374e+06		9	25.2222	140	1.85817	215.409	87.4363	1.25956e+06
4	54.75	106	1.88025	221.62	70.5031	1.05036e+06		9	25.2222	140	1.8581	215.366	87.4451	1.25917e+06
4	54.75	106	1.88031	221.642	70.4966	1.04872e+06		9	25.2222	140	1.85767	215.247	87.4508	1.26034e+06
4	54.75	106	1.87999	221.631	70.4856	1.05337e+06		9	25.2222	140	1.85772	215.252	87.4555	1.26158e+06
4	54.75	106	1.88001	221.747	70.4439	1.0516e+06		9	25.2222	140	1.85794	215.335	87.4183	1.25789e+06
4	54.75	106	1.88043	221.694	70.4605	1.05248e+06		9	25.2222	140	1.85797	215.304	87.4335	1.25807e+06
5	44	84	1.88024	221.626	70.4888	1.05242e+06		9	25.2222	140	1.85862	215.363	87.4077	1.25459e+06
5	44	84	1.88121	221.645	70.4998	1.05266e+06		9	25.2222	140	1.85847	215.391	87.4202	1.25397e+06
5	43.8	83	1.88144	221.802	70.4446	1.05168e+06		9	25.2222	140	1.85896	215.369	87.435	1.25611e+06
5	44	84	1.88175	221.667	70.4848	1.05271e+06		9	25.2222	140	1.85896	215.228	87.4235	1.26262e+06
5	44	84	1.88196	221.648	70.4836	1.05331e+06		9	25.2222	140	1.8593	215.323	87.4105	1.26095e+06
5	44	84	1.88021	221.574	70.4913	1.04467e+06		9	25.2222	140	1.85911	215.19	87.4147	1.26299e+06
5	44	84	1.88119	221.652	70.5028	1.04415e+06		9	25.2222	140	1.85948	215.31	87.3722	1.25753e+06
5	44	84	1.88143	221.662	70.5006	1.04652e+06		9	25.2222	140	1.85946	215.367	87.3931	1.25542e+06
5	44	84	1.88153	221.747	70.4911	1.04279e+06		9	25.2222	140	1.85933	215.305	87.3857	1.25266e+06
5	44	84	1.88263	221.75	70.5045	1.04173e+06		9	25.2222	140	1.85972	215.408	87.3614	1.24882e+06
5	44	84	1.88274	221.654	70.5142	1.04348e+06		9	25.2222	140	1.85989	215.381	87.3943	1.25293e+06
5	44	84	1.88309	221.671	70.5706	1.04073e+06		9	25.2222	140	1.86057	215.356	87.3853	1.25105e+06
5	44	84	1.88271	221.694	70.5458	1.04096e+06		9	25.2222	140	1.86077	215.424	87.3644	1.24037e+06
5	44	84	1.88268	221.761	70.5104	1.03928e+06		9	25.2222	140	1.86041	215.385	87.3653	1.24348e+06
4	55	106	1.88273	221.809	70.505	1.03974e+06		9	25.2222	140	1.86078	215.419	87.3781	1.24322e+06
5	44	84	1.88305	221.839	70.502	1.03813e+06		9	25.2222	140	1.86062	215.482	87.376	1.24492e+06
5	44	84	1.88339	221.78	70.5336	1.04332e+06		9	25.2222	140	1.86004	215.542	87.3772	1.23769e+06
5	44	84	1.88306	221.758	70.532	1.04312e+06		9	25.2222	140	1.86014	215.479	87.3992	1.24212e+06
5	44	84	1.88294	221.879	70.4795	1.03864e+06		8	28.375	140	1.86008	215.397	87.4162	1.24824e+06
4	55	106	1.8826	221.832	70.4845	1.04278e+06		8	28.375	140	1.85968	215.237	87.4466	1.24704e+06
4	55	106	1.88243	221.938	70.4532	1.04179e+06		8	28.375	140	1.85999	215.257	87.4434	1.25043e+06
4	55	106	1.88152	222.014	70.4222	1.04036e+06		8	28.375	140	1.85968	215.308	87.4179	1.24197e+06
4	55	106	1.88139	222.089	70.3909	1.03938e+06		8	28.375	140	1.85972	215.247	87.4051	1.2464e+06
4	55	106	1.8817	222.082	70.413	1.03965e+06		8	28.375	140	1.85981	215.295	87.4156	1.24126e+06
4	55	106	1.88138	222.05	70.416	1.0403e+06		8	28.375	140	1.86029	215.313	87.4227	1.24393e+06
4	55	106	1.88146	222.098	70.4175	1.03698e+06		8	28.375	140	1.85995	215.356	87.4138	1.24172e+06
4	55	106	1.88173	222.085	70.4406	1.03943e+06		8	28.375	140	1.85972	215.363	87.4083	1.24178e+06
16	13.5	35	1.34208	103.076	272.609	282743		8	28.25	126	1.849	186.063	120.592	1.39515e+06
16	13.5	35	1.3421	103.079	272.614	281062		8	28.25	126	1.84853	185.873	120.61	1.40155e+06
16	13.5	35	1.34216	103.094	272.619	284327		8	28.25	126	1.84872	185.859	120.655	1.40004e+06
16	13.5	35	1.34208	103.094	272.619	283717		8	28.25	126	1.84899	185.848	120.675	1.39881e+06
17	12.7059	32	1.34208	103.099	272.628	284155		8	28.25	126	1.84855	185.872	120.569	1.39918e+06
17	12.7059	32	1.34202	103.095	272.636	282086		8	28.25	126	1.84839	185.769	120.672	1.39678e+06
17	12.7059	32	1.34203	103.095	272.642	282091		8	28.25	126	1.84802	185.623	120.72	1.39127e+06
17	12.7059	32	1.34206	103.099	272.634	281974		8	28.25	126	1.8481	185.734	120.667	1.38827e+06
16	13.5	35	1.3421	103.098	272.635	285835		8	28.25	126	1.84784	185.769	120.651	1.38e+06
16	13.5	35	1.34207	103.106	272.631	283746		8	28.25	126	1.84764	185.748	120.689	1.3795e+06
16	13.5	35	1.34204	103.105	272.633	285543		8	28.25	126	1.84743	185.734	120.726	1.40174e+06
16	13.5	35	1.34199	103.121	272.625	285845		8	28.25	126	1.84711	185.692	120.633	1.3842e+06
16	13.5	35	1.34202	103.12	272.623	282002		8	28.25	126	1.84671	185.873	120.62	1.36029e+06
16	13.5	35	1.34205	103.108	272.629	282244		8	28.25	126	1.8469	185.865	120.608	1.35719e+06
16	13.5	35	1.34205	103.108	272.629	282244		8	28.25	126	1.84698	185.945	120.676	1.33864e+06
16	13.5	35	1.34199	103.082	272.632	283503		8	28.25	126	1.8468	185.98	120.543	1.37682e+06
16	13.5	35	1.34187	103.095	272.638	282217		8	28.25	126	1.84652	185.685	120.754	1.35889e+06
16	13.5	35	1.34184	103.093	272.642	284558		8	28.25	126	1.84603	185.711	120.735	1.36242e+06
16	13.5	35	1.34173	103.089	272.65	287681		8	28.25	126	1.84602	185.735	120.788	1.39156e+06
16	13.5	35	1.34173	103.124	272.646	285080		8	28.25	126	1.84622	185.767	120.749	1.39511e+06
16	13.5	35	1.34169	103.127	272.64	282692		8	28.25	126	1.84591	185.599	120.833	1.40387e+06
16	13.5	35	1.34174	103.122	272.635	285466		8	28.25	126	1.84577	185.771	120.734	1.40157e+06
16	13.5	35	1.34177	103.117	272.629	285499		8	28.25	126	1.84576	185.859	120.665	1.39347e+06
16	13.5	35	1.34181	103.141	272.618	284961		8	28.25	126	1.84577	185.79	120.706	1.39358e+06
16	13.5	35	1.34183	103.137	272.609	288961		8	28.25	126	1.84565	185.652	120.747	1.38772e+06
16	13.5	35	1.3419	103.127	272.606	286069		8	28.25	126	1.84564	185.79	120.637	1.39211e+06
16	13.5	35	1.34192	103.123	272.6	287886		8	28.25	126	1.84614	185.914	120.596	1.37944e+06
16	13.5	35	1.34193	103.127	272.593	285166		8	28.25	126	1.84593	185.939	120.684	1.38048e+06
16	13.5	35	1.34193	103.129	272.59	285795		8	28.25	126	1.84597	185.883	120.703	1.38069e+06
16	13.5	35	1.34199	103.129	272.594	284767		8	28.25	126	1.84618	185.842	120.685	1.37857e+06
16	13.5	35	1.34206	103.124	272.595	287313		8	28.25	126	1.84593	185.968	120.64	1.37478e+06
16	13.5	35	1.34211	103.137	272.597	284068		8	28.25	126	1.84623	185.859	120.704	1.38164e+06
16	13.5	35	1.34209	103.122	272.601	284673		8	28.25	126	1.84661	185.963	120.735	1.34355e+06
16	13.5	35	1.3421	103.116	272.595	284562		8	28.25	126	1.84635	185.833	120.829	1.34108e+06
16	13.5	35	1.34212	103.13	272.594	283611		8	28.25	126	1.84614	185.852	120.814	1.34873e+06
16	13.5	35	1.34209	103.128	272.602	283959		8	28.25	126	1.84619	185.92	120.83	1.33557e+06
16	13.5	35	1.34218	103.15	272.601	285826		8	28.25	126	1.84616	185.84	120.88	1.35451e+06
16	13.5	35	1.34228	103.15	272.6	286623		8	28.25	126	1.84624	185.906	120.889	1.35428e+06
16	13.5	35	1.34235	103.158	272.595	287054		8	28.25	126	1.84634	185.959	120.904	1.35327e+06
16	13.5	35	1.34231	103.164	272.596	286779		8	28.25	126	1.8463	185.97	120.885	1.36475e+06
16	13.5	35	1.34235	103.151	272.606	286259		8	28.25	126	1.8463	185.89	120.907	1.34941e+06
16	13.5	35	1.34228	103.162	272.603	286195		8	28.25	126	1.84634	185.948	120.884	1.36387e+06
16	13.5	35	1.34227	103.156	272.604	286279		8	28.25	126	1.84673	185.997	120.885	1.34562e+06
16	13.5	35	1.34231	103.163	272.591	285703		8	28.25	126	1.84621	185.87	120.933	1.34655e+06
16	13.5	35	1.34228	103.159	272.592	285496		8	28.25	126	1.84651	185.918	120.882	1.34757e+06
16	13.5	35	1.34233	103.159	272.595	285355		8	28.25	126	1.84665	185.981	120.891	1.34601e+06
16	13.5	35	1.34251	103.166	272.592	285831		8	28.25	126	1.8469	185.969	120.87	1.34755e+06
16	13.5	35	1.34266	103.17	272.583	285612		8	28.25	126	1.84645	185.924	120.929	1.34923e+06
16	13.5	35	1.34277	103.172	272.583	285595		8	28.25	126	1.84696	186.031	120.89	1.3471e+06
16	13.5	35	1.34274	103.159	272.586	287157		8	28.25	126	1.84693	186.181	120.87	1.35381e+06
16	13.5	35	1.34274	103.145	272.591	287200		8	28.25	126	1.84695	186.102	120.889	1.3651e+06
16	13.5	35	1.34261	103.132	272.589	287402		8	28.25	126	1.84701	186.14	120.842	1.36608e+06
16	13.5	35	1.34253	103.15	272.584	287416		8	28.25	126	1.84691	186.197	120.786	1.34916e+06
16	13.5	35	1.34257	103.13	272.586	288143		8	28.25	126	1.84701	186.184	120.836	1.34794e+06
16	13.5	35	1.34242	103.113	272.597	288082		8	28.25	126	1.84699	186.167	120.841	1.36531e+06
16	13.5	35	1.34232	103.124	272.585	289955		8	28.25	126	1.84699	186.117	120.889	1.36501e+06
16	13.5	35	1.34226	103.132	272.583	292100		8	28.25	126	1.84699	186.091	120.874	1.36605e+06
16	13.5	35	1.3423	103.145	272.565	289359		8	28.25	126	1.84721	186.104	120.864	1.36759e+06
16	13.5	35	1.3421	103.136	272.578	286134		8	28.25	126	1.84711	186.026	120.877	1.36759e+06
16	13.5	35	1.3422	103.128	272.571	287786		8	28.25	126	1.84685	186	120.905	1.36866e+06
16	13.5	35	1.34216	103.145	272.563	289224		8	28.25	126	1.84691	186.11	120.826	1.36609e+06
16	13.5	35	1.34216	103.135	272.568	288934		8	28.25	126	1.84682	186.064	120.85	1.3662e+06
16	13.5	35	1.34225	103.166	272.564	294677		8	28.25	126	1.8469	186.096	120.846	1.36304e+06
16	13.5	35	1.34227	103.171	272.578	293615		8	28.25	126	1.84657	185.987	120.836	1.36487e+06
16	13.5	35	1.34217	103.161	272.577	293925		8	28.25	126	1.84625	185.963	120.869	1.36168e+06
16	13.5	35	1.3421	103.162	272.586	289078		8	28.25	126	1.84662	186.043	120.823	1.36132e+06
16	13.5	35	1.34221	103.156	272.578	284892		8	28.25	126	1.84678	186.116	120.809	1.36531e+06
16	13.5	35	1.34218	103.149	272.576	288864		8	28.25	126	1.84642	186.057	120.867	1.36508e+06
16	13.5	35	1.34208	103.121	272.583	288902		8	28.25	126	1.84683	186.111	120.853	1.36285e+06
16	13.5	35	1.34214	103.16	272.565	298158		8	28.25	126	1.84667	186.07	120.869	1.36021e+06
16	13.5	35	1.34214	103.149	272.573	295729		8	28.25	126	1.84697	186.112	120.831	1.36072e+06
16	13.5	35	1.34221	103.14	272.566	293655		8	28.25	126	1.84693	186.096	120.846	1.36217e+06
16	13.5	35	1.34229	103.134	272.554	292674		8	28.25	126	1.84704	186.072	120.906	1.36314e+06
16	13.5	35	1.34237	103.149	272.555	291772		8	28.25	126	1.84662	186.128	120.939	1.35449e+06
16	13.5	35	1.34247	103.145	272.56	291676		8	28.25	126	1.84675	186.018	121.005	1.36277e+06
16	13.5	35	1.34244	103.154	272.561	289948		8	28.25	126	1.84643	185.876	120.944	1.36088e+06
16	13.5	35	1.34241	103.162	272.558	290653		8	28.25	126	1.84661	185.86	120.977	1.35983e+06
16	13.5	35	1.34246	103.161	272.559	290463		8	28.25	126	1.8466	185.849	120.969	1.35157e+06
16	13.5	35	1.34239	103.164	272.565	290980		8	28.25	126	1.84695	185.845	120.975	1.36439e+06
16	13.5	35	1.34245	103.178	272.562	294630		8	28.25	126	1.84721	185.895	120.939	1.36625e+06
16	13.5	35	1.34237	103.181	272.566	289767		8	28.25	126	1.84731	185.698	121.021	1.38168e+06
16	13.5	35	1.34245	103.186	272.562	293314		8	28.25	126	1.84722	185.744	121.097	1.37973e+06
16	13.5	35	1.34248	103.184	272.557	288956		8	28.25	126	1.84724	185.882	121.044	1.36325e+06
16	13.5	35	1.34246	103.197	272.552	290455		8	28.25	126	1.84719	185.797	121.128	1.36804e+06
16	13.5	35	1.34257	103.204	272.551	290398		8	28.25	126	1.84731	185.871	121.023	1.37116e+06
16	13.5	35	1.34249	103.21	272.55	290174		8	28.25	126	1.84748	185.952	120.973	1.37062e+06
16	13.5	35	1.34252	103.203	272.552	290434		8	28.25	126	1.84741	185.921	121.012	1.37186e+06
16	13.5	35	1.34245	103.2	272.555	287433		8	28.25	126	1.847	186.011	120.983	1.37268e+06
16	13.5	35	1.34251	103.194	272.544	289773		8	28.25	126	1.84718	185.933	121.041	1.37143e+06
16	13.5	35	1.34246	103.181	272.54	289821		8	28.25	126	1.84712	186.009	120.947	1.37516e+06
16	13.5	35	1.34246	103.186	272.538	291263		8	28.25	126	1.8469	186.172	120.915	1.37099e+06
16	13.5	35	1.34242	103.173	272.551	291889		8	28.25	126	1.84694	186.106	120.936	1.37183e+06
16	13.5	35	1.34243	103.175	272.541	289693		8	28.25	126	1.84671	186.033	120.95	1.37219e+06
16	13.5	35	1.34236	103.162	272.549	289915		8	28.25	126	1.84679	185.978	120.998	1.37883e+06
16	13.5	35	1.34245	103.175	272.53	289448		8	28.25	126	1.84698	185.969	121.041	1.3746e+06
16	13.5	35	1.34245	103.168	272.536	287918		8	28.25	126	1.84662	185.941	121.1	1.37569e+06
16	13.5	35	1.34255	103.164	272.527	286183		8	28.25	126	1.84683	185.981	121.074	1.37631e+06
16	13.5	35	1.34254	103.161	272.532	283226		8	28.25	126	1.84698	185.964	121.049	1.37503e+06
16	13.5	35	1.34256	103.137	272.532	280119		8	28.25	126	1.84685	185.952	121.054	1.37422e+06
16	13.5	35	1.34271	103.133	272.529	280832		8	28.25	126	1.84705	185.81	121.151	1.37787e+06
15	14.4	47	1.38851	116.733	241.816	624740		8	28.375	169	1.82554	223.159	82.8021	1.42019e+06
15	14.4	47	1.38841	116.684	241.896	613545		8	28.375	169	1.82586	223.04	82.8165	1.4208e+06
15	14.4	47	1.38851	116.751	241.786	626061		8	28.375	169	1.82608	223.05	82.8269	1.42263e+06
15	14.4	47	1.38862	116.742	241.727	626717		8	28.375	169	1.82594	222.936	82.8436	1.42344e+06
15	14.4	47	1.38852	116.687	241.797	628904		8	28.375	169	1.82619	222.822	82.8685	1.41444e+06
15	14.4	47	1.38846	116.682	241.824	629890		8	28.375	169	1.82591	222.813	82.87	1.41703e+06
15	14.4	47	1.38832	116.659	241.817	630755		8	28.375	169	1.8257	223.025	82.8203	1.42017e+06
15	14.4	47	1.3883	116.634	241.827	634442		8	28.375	169	1.82621	223.058	82.8127	1.41436e+06
15	14.4	47	1.38826	116.605	241.837	635996		8	28.375	169	1.82587	222.975	82.8273	1.41739e+06
15	14.4	47	1.38832	116.605	241.831	628965		8	28.375	169	1.82597	222.991	82.8282	1.41816e+06
15	14.4	47	1.38824	116.553	241.861	630673		8	28.375	169	1.82578	223.109	82.8133	1.41563e+06
15	14.4	47	1.38824	116.619	241.833	633707		8	28.375	169	1.82628	223.095	82.8151	1.41385e+06
15	14.4	47	1.38828	116.622	241.83	634061		8	28.375	169	1.82652	223.169	82.7896	1.41392e+06
15	14.4	47	1.38851	116.631	241.83	632974		8	28.375	169	1.82685	223.147	82.8273	1.40896e+06
15	14.4	47	1.38848	116.63	241.836	634116		8	28.375	169	1.82718	223.175	82.8191	1.41956e+06
15	14.4	47	1.3885	116.672	241.835	634224		8	28.375	169	1.8272	223.224	82.8056	1.41575e+06
15	14.4	47	1.3886	116.63	241.864	629322		8	28.375	169	1.82735	223.26	82.7958	1.41583e+06
15	14.4	47	1.38858	116.61	241.828	632530		8	28.375	169	1.82736	223.367	82.796	1.41637e+06
15	14.4	47	1.38826	116.595	241.829	634022		8	28.375	169	1.8275	223.374	82.8069	1.41788e+06
15	14.4	47	1.38821	116.619	241.867	633145		8	28.375	169	1.82794	223.385	82.7996	1.41543e+06
15	14.4	47	1.38815	116.594	241.854	633797		8	28.375	169	1.82805	223.398	82.8134	1.41611e+06
15	14.4	47	1.38849	116.606	241.867	619853		8	28.375	169	1.82809	223.225	82.8348	1.41492e+06
15	14.4	47	1.38852	116.693	241.808	618209		8	28.375	169	1.82763	223.143	82.8435	1.41387e+06
15	14.4	47	1.38833	116.637	241.879	613605		8	28.375	169	1.82749	223.073	82.861	1.41489e+06
15	14.4	47	1.38846	116.64	241.894	615561		8	28.375	169	1.82738	223.022	82.8654	1.41701e+06
15	14.4	47	1.38863	116.706	241.831	613358		8	28.375	169	1.82734	222.922	82.8626	1.41395e+06
15	14.4	47	1.38861	116.609	241.893	628372		8	28.375	169	1.82776	222.817	82.8871	1.41723e+06
15	14.4	47	1.38888	116.58	241.985	619172		8	28.375	169	1.82765	222.804	82.8869	1.4143e+06
15	14.4	47	1.38902	116.543	242.048	620060		8	28.375	169	1.82788	222.74	82.8989	1.41149e+06
15	14.4	47	1.38914	116.611	242.003	617606		8	28.375	169	1.82773	222.718	82.9208	1.41383e+06
15	14.4	47	1.3891	116.595	242.036	617748		8	28.375	169	1.82741	222.586	82.9421	1.4159e+06
15	14.4	47	1.38903	116.59	242.018	618415		8	28.375	169	1.82729	222.657	82.9366	1.41723e+06
15	14.4	47	1.3891	116.626	241.954	618477		8	28.375	169	1.82685	222.642	82.9366	1.41425e+06
15	14.4	47	1.38929	116.622	241.961	621128		8	28.375	169	1.82703	222.438	82.973	1.4213e+06
15	14.4	47	1.38932	116.583	241.953	620551		8	28.375	169	1.82704	222.589	82.9626	1.41967e+06
15	14.4	47	1.38918	116.605	241.958	618041		8	28.375	169	1.82659	222.658	82.9655	1.41916e+06
15	14.4	47	1.38901	116.609	241.931	620001		8	28.375	169	1.82648	222.661	82.9667	1.42001e+06
15	14.4	47	1.38906	116.619	241.934	619893		8	28.375	169	1.82643	222.634	82.9689	1.41656e+06
15	14.4	47	1.3891	116.602	241.91	620425		8	28.375	169	1.82636	222.698	82.9649	1.42244e+06
15	14.4	47	1.3893	116.641	241.933	620077		8	28.375	169	1.8262	222.671	82.9773	1.42168e+06
15	14.4	47	1.38932	116.644	241.912	621093		8	28.375	169	1.82635	222.474	82.9868	1.42372e+06
15	14.4	47	1.38932	116.644	241.912	621093		8	28.375	169	1.82666	222.624	82.9627	1.42367e+06
15	14.4	47	1.38943	116.558	241.961	622790		8	28.375	169	1.82664	222.663	82.9582	1.42802e+06
15	14.4	47	1.38962	116.578	241.949	622012		8	28.375	169	1.82662	222.712	82.9548	1.4232e+06
15	14.4	47	1.38956	116.568	241.961	622215		8	28.375	169	1.82585	222.589	82.9678	1.42072e+06
15	14.4	47	1.38966	116.615	241.945	621014		8	28.375	169	1.82574	222.612	82.9692	1.42008e+06
15	14.4	47	1.38966	116.653	241.904	620088		8	28.375	169	1.82532	222.574	82.9724	1.42584e+06
15	14.4	47	1.38986	116.708	241.886	618858		8	28.375	169	1.82536	222.489	82.9864	1.42807e+06
15	14.4	47	1.38983	116.688	241.896	605011		8	28.375	169	1.82564	222.721	82.9457	1.42662e+06
15	14.4	47	1.39021	116.726	241.868	603833		8	28.375	169	1.82552	222.888	82.9194	1.42324e+06
15	14.4	47	1.38994	116.721	241.874	604079		8	28.375	169	1.825	222.805	82.9362	1.42505e+06
15	14.4	47	1.38971	116.703	241.87	604320		8	28.375	169	1.82542	222.843	82.9374	1.42278e+06
15	14.4	47	1.38973	116.708	241.852	602830		8	28.375	169	1.82567	222.919	82.9284	1.42201e+06
15	14.4	47	1.38977	116.743	241.837	603859		8	28.375	169	1.82535	222.745	82.9572	1.42519e+06
15	14.4	47	1.38959	116.73	241.857	603822		8	28.375	169	1.82516	222.828	82.9519	1.42278e+06
15	14.4	47	1.38969	116.727	241.842	624463		8	28.375	169	1.82548	222.823	82.954	1.42401e+06
15	14.4	47	1.38969	116.741	241.799	622811		8	28.375	169	1.82524	222.922	82.9483	1.42323e+06
15	14.4	47	1.38967	116.758	241.846	623197		8	28.375	169	1.82547	223.025	82.9361	1.41937e+06
15	14.4	47	1.38967	116.738	241.876	625276		8	28.375	169	1.82533	222.972	82.9463	1.42082e+06
15	14.4	47	1.38951	116.679	241.939	625055		8	28.375	169	1.82575	223.074	82.9384	1.42271e+06
15	14.4	47	1.38975	116.667	241.975	626015		8	28.375	169	1.8256	223.033	82.9529	1.42216e+06
15	14.4	47	1.38973	116.648	242.07	628144		8	28.375	169	1.82542	223.05	82.9576	1.42232e+06
15	14.4	47	1.38956	116.635	242.073	630888		8	28.375	169	1.82552	223.018	82.9632	1.4249e+06
15	14.4	47	1.38946	116.601	242.061	632990		8	28.375	169	1.8253	222.935	82.9775	1.4287e+06
15	14.4	47	1.38928	116.628	242.011	633276		8	28.375	169	1.82503	223.113	82.9587	1.42654e+06
15	14.4	47	1.38931	116.649	242.012	621912		8	28.375	169	1.8249	222.99	82.9721	1.42727e+06
15	14.4	47	1.38959	116.604	242.014	621756		8	28.375	169	1.82447	222.967	82.9544	1.42654e+06
15	14.4	47	1.38953	116.551	242.067	623673		8	28.375	169	1.82457	222.937	82.9746	1.42882e+06
15	14.4	47	1.38972	116.599	242.024	622337		8	28.375	169	1.82475	222.929	82.9764	1.43122e+06
15	14.4	47	1.38956	116.594	242.05	620897		8	28.375	169	1.82477	222.988	82.9721	1.43449e+06
15	14.4	47	1.38948	116.595	242.055	621209		8	28.375	169	1.82478	222.913	82.9832	1.4351e+06
15	14.4	47	1.38959	116.568	242.055	622856		8	28.375	169	1.82509	222.932	82.9945	1.43541e+06
15	14.4	47	1.38965	116.588	242.058	620565		8	28.375	169	1.82498	222.942	82.9925	1.43518e+06
15	14.4	47	1.38959	116.594	242.061	621489		8	28.375	169	1.82515	222.918	82.9991	1.43478e+06
15	14.4	47	1.38941	116.555	242.066	623070		8	28.375	169	1.82534	222.977	82.9911	1.43421e+06
15	14.4	47	1.38924	116.532	242.09	624533		8	28.375	169	1.82576	223.007	82.9858	1.43126e+06
15	14.4	47	1.38916	116.589	242.086	623730		8	28.375	169	1.82591	223.022	82.9772	1.43118e+06
15	14.4	47	1.38918	116.602	242.032	623940		8	28.375	169	1.82577	223.023	82.9834	1.42487e+06
15	14.4	47	1.38919	116.605	242.06	623824		8	28.375	169	1.82603	223.049	82.9832	1.42612e+06
15	14.4	47	1.38924	116.63	242.073	624507		8	28.375	169	1.82591	223.073	82.9827	1.43304e+06
15	14.4	47	1.38931	116.622	242.089	626836		8	28.375	169	1.82587	223.053	82.9802	1.42528e+06
15	14.4	47	1.38932	116.582	242.114	628523		8	28.375	169	1.82613	223.292	82.9364	1.42296e+06
15	14.4	47	1.38924	116.597	242.132	626766		8	28.375	169	1.8263	223.295	82.9271	1.42228e+06
15	14.4	47	1.38938	116.621	242.094	625198		8	28.375	169	1.82612	223.01	82.9776	1.42559e+06
15	14.4	47	1.38928	116.643	242.066	624572		8	28.375	169	1.82596	223.114	82.9551	1.42557e+06
15	14.4	47	1.38945	116.674	242.057	624786		8	28.375	169	1.82614	223.237	82.9624	1.41934e+06
15	14.4	47	1.3895	116.676	242.067	623635		8	28.375	169	1.82607	223.235	82.957	1.4218e+06
15	14.4	47	1.38975	116.697	242.081	622748		8	28.375	169	1.82625	223.328	82.945	1.4218e+06
15	14.4	47	1.38973	116.705	242.084	622761		8	28.375	169	1.82611	223.314	82.9495	1.42109e+06
15	14.4	47	1.38971	116.692	242.103	623418		8	28.375	169	1.82641	223.201	82.9594	1.42302e+06
15	14.4	47	1.38972	116.697	242.079	622773		8	28.375	169	1.82585	223.153	82.9584	1.42197e+06
15	14.4	47	1.38949	116.688	242.065	635696		8	28.375	169	1.82533	223.184	82.9421	1.42653e+06
15	14.4	47	1.38941	116.655	242.083	638626		8	28.375	169	1.82535	223.218	82.9245	1.42431e+06
15	14.4	47	1.38934	116.662	242.089	638899		8	28.375	169	1.82566	223.172	82.9474	1.42193e+06
15	14.4	47	1.38913	116.667	242.107	639303		8	28.375	169	1.82584	223.12	82.9599	1.42497e+06
15	14.4	47	1.38905	116.649	242.097	640284		8	28.375	169	1.82575	223.168	82.9633	1.42496e+06
15	14.4	47	1.38897	116.653	242.088	658226		8	28.375	169	1.82566	223.234	82.9501	1.4244e+06
15	14.4	47	1.38886	116.644	242.085	644106		8	28.375	169	1.8253	223.214	82.9502	1.42386e+06
15	14.4	47	1.38891	116.616	242.078	646267		8	28.375	169	1.82537	223.33	82.9249	1.41937e+06
15	14.4	47	1.38879	116.666	242.04	643907		8	28.375	169	1.8255	223.272	82.9399	1.41954e+06
3	73	186	1.82705	208.05	85.5972	978087		10	22.7	59	1.80405	192.554	89.8263	1.68772e+06
3	73	186	1.8275	208.196	85.8253	926968		10	22.7	59	1.80447	192.623	89.8107	1.70339e+06
3	73	186	1.8273	207.98	85.8238	985147		10	22.7	59	1.80443	192.647	89.7947	1.70292e+06
3	73	186	1.82623	207.952	84.6187	1.0631e+06		10	22.7	59	1.80436	192.605	89.7625	1.70135e+06
3	73	186	1.82638	208.498	83.2602	1.17138e+06		10	22.7	59	1.80443	192.692	89.7347	1.69954e+06
3	73	186	1.82652	208.756	83.0228	1.16083e+06		10	22.7	59	1.80355	192.648	89.7604	1.6985e+06
3	73	186	1.82756	208.836	83.3734	1.13127e+06		10	22.7	59	1.80361	192.808	89.7011	1.69867e+06
3	73	186	1.82756	208.836	83.3734	1.13127e+06		10	22.7	59	1.80361	192.808	89.7011	1.69867e+06
3	73	186	1.82796	208.964	83.5244	1.10562e+06		10	22.7	59	1.8034	192.754	89.7314	1.69984e+06
3	73	186	1.82895	208.962	83.6846	1.09147e+06		10	22.7	59	1.80304	192.682	89.7154	1.69768e+06
3	73	186	1.82756	208.826	83.5684	1.09871e+06		10	22.7	59	1.80283	192.714	89.6845	1.69874e+06
3	73	186	1.82683	208.762	83.2118	1.09582e+06		10	22.7	59	1.80247	192.647	89.7053	1.69166e+06
3	73	186	1.82671	208.779	82.525	1.35163e+06		10	22.7	59	1.80268	192.746	89.6737	1.68098e+06
3	73	186	1.82631	208.62	83.6022	1.09829e+06		10	22.7	59	1.8024	192.762	89.6658	1.68375e+06
3	73	186	1.82481	208.979	83.2639	1.08936e+06		10	22.7	59	1.80245	192.685	89.6782	1.69405e+06
3	73	186	1.82466	208.692	84.1214	1.03776e+06		10	22.7	59	1.80217	192.68	89.6436	1.68969e+06
3	73	186	1.82536	208.845	83.7575	1.05842e+06		10	22.7	59	1.80246	192.704	89.6514	1.68581e+06
3	73	186	1.82568	208.742	83.5055	1.14737e+06		10	22.7	59	1.80209	192.81	89.5911	1.68084e+06
3	73	186	1.82463	208.714	83.6756	1.13525e+06		10	22.7	59	1.80231	192.91	89.5651	1.67603e+06
3	73	186	1.82463	208.32	84.2479	1.1322e+06		10	22.7	59	1.80261	193.001	89.5166	1.68045e+06
3	73	186	1.82432	208.107	83.0413	1.18589e+06		10	22.7	59	1.80308	192.925	89.5515	1.67762e+06
3	73	186	1.82304	208.224	83.1953	1.1525e+06		10	22.7	59	1.80377	192.914	89.5519	1.67297e+06
3	73	186	1.82368	208.087	83.7199	1.18546e+06		10	22.7	59	1.80367	192.938	89.5423	1.66961e+06
4	54.75	98	1.82407	208.505	82.6624	1.27706e+06		10	22.7	59	1.80332	192.911	89.54	1.67805e+06
4	54.75	98	1.8256	209.199	81.8363	1.2994e+06		10	22.7	59	1.80323	192.95	89.5258	1.66735e+06
4	54.75	98	1.82583	208.86	82.2585	1.2987e+06		10	22.7	59	1.80341	192.946	89.5476	1.66692e+06
4	54.75	98	1.82545	208.135	84.0058	1.09717e+06		10	22.7	59	1.80418	192.967	89.5585	1.66588e+06
4	54.75	98	1.82518	207.903	85.0437	1.02624e+06		10	22.7	59	1.80443	192.831	89.6049	1.6702e+06
4	54.75	98	1.82489	207.637	85.0993	1.04363e+06		10	22.7	59	1.80443	192.799	89.6249	1.67852e+06
4	54.75	98	1.82405	207.369	85.8788	984446		10	22.7	59	1.80455	192.879	89.6299	1.67647e+06
4	54.75	98	1.82376	208.235	83.8205	1.10238e+06		10	22.7	59	1.80458	192.946	89.6087	1.66755e+06
4	54.75	98	1.82383	209.005	83.7037	1.05333e+06		10	22.7	59	1.80444	192.841	89.6261	1.66658e+06
4	54.75	98	1.82488	208.836	83.8501	1.10456e+06		10	22.7	59	1.8049	192.922	89.596	1.66753e+06
4	54.75	98	1.82415	209.111	83.2476	1.116e+06		10	22.7	59	1.80506	192.918	89.6259	1.67633e+06
4	54.75	98	1.82413	209.041	83.9701	1.06243e+06		10	22.7	59	1.80545	192.869	89.679	1.67839e+06
4	54.75	98	1.82236	208.806	83.3947	1.09345e+06		10	22.7	59	1.80497	192.864	89.6533	1.67194e+06
4	54.75	98	1.82251	209.237	82.9387	1.10655e+06		10	22.7	59	1.8056	192.979	89.6055	1.66993e+06
4	54.75	98	1.82339	208.601	84.1218	1.03216e+06		10	22.7	59	1.80596	192.919	89.6453	1.67189e+06
4	54.75	98	1.82494	208.802	84.1981	1.07022e+06		10	22.7	59	1.80592	192.808	89.7007	1.67581e+06
4	54.75	98	1.82404	208.623	83.9413	1.07094e+06		10	22.7	59	1.80578	192.883	89.6867	1.67432e+06
4	54.75	98	1.82407	208.425	84.1188	1.0704e+06		10	22.7	59	1.80576	192.805	89.7296	1.67818e+06
4	54.75	98	1.82451	208.806	83.4755	1.06247e+06		10	22.7	59	1.80629	192.87	89.7383	1.67782e+06
4	54.75	98	1.82381	208.755	83.3752	1.07813e+06		10	22.7	59	1.80564	192.832	89.7204	1.67265e+06
4	54.75	98	1.82339	209.509	82.6489	1.05635e+06		10	22.7	59	1.80611	192.791	89.7271	1.67614e+06
4	54.75	98	1.82382	209.062	83.8635	998954		10	22.7	59	1.80593	192.823	89.7091	1.67557e+06
4	54.75	98	1.82323	208.609	84.564	1.00261e+06		10	22.7	59	1.80583	192.806	89.7178	1.67684e+06
4	54.75	98	1.82229	207.966	85.055	998837		10	22.7	59	1.80592	192.737	89.7195	1.67857e+06
4	54.75	98	1.82188	207.462	85.2503	990652		10	22.7	59	1.80604	192.755	89.7018	1.68651e+06
4	54.75	98	1.8231	208.055	83.5584	1.13022e+06		10	22.7	59	1.80583	192.741	89.7196	1.68794e+06
4	54.75	98	1.82512	208.315	82.5394	1.14434e+06		10	22.7	59	1.8053	192.665	89.6906	1.68472e+06
4	54.75	98	1.82574	208.393	81.9176	1.29093e+06		10	22.7	59	1.80521	192.774	89.6787	1.68311e+06
4	54.75	98	1.8241	208.356	81.3492	1.40149e+06		10	22.7	59	1.80474	192.557	89.7638	1.68093e+06
4	54.75	98	1.82642	208.325	82.2439	1.29081e+06		10	22.7	59	1.80534	192.728	89.7067	1.67701e+06
4	54.75	98	1.82535	208.041	82.2575	1.29563e+06		10	22.7	59	1.80519	192.618	89.7218	1.68854e+06
4	54.75	98	1.82521	208.025	81.7346	1.31791e+06		10	22.7	59	1.80545	192.831	89.6377	1.67618e+06
4	54.75	98	1.82628	208.278	82.2231	1.2724e+06		10	22.7	59	1.80534	192.976	89.5874	1.68321e+06
4	54.75	98	1.82453	207.52	83.2759	1.21359e+06		10	22.7	59	1.80552	192.993	89.6131	1.67021e+06
4	54.75	98	1.82468	207.763	83.3456	1.18219e+06		10	22.7	59	1.8057	192.945	89.6239	1.675e+06
4	54.75	98	1.82452	207.986	82.8284	1.29533e+06		10	22.7	59	1.806	192.874	89.6625	1.6739e+06
4	54.75	98	1.82469	208.134	82.1794	1.46257e+06		10	22.7	59	1.80643	192.888	89.66	1.67945e+06
4	54.75	98	1.82451	208.201	82.3513	1.29658e+06		10	22.7	59	1.80658	192.926	89.6782	1.68189e+06
4	54.75	98	1.82589	209.165	80.3342	1.33542e+06		10	22.7	59	1.80679	192.959	89.6653	1.67655e+06
4	54.75	98	1.824	208.734	80.6294	1.43177e+06		10	22.7	59	1.8066	192.953	89.668	1.67565e+06
4	54.75	98	1.82388	207.812	81.7989	1.47168e+06		10	22.7	59	1.80641	192.986	89.6611	1.67774e+06
4	54.75	98	1.82523	207.726	82.5232	1.42121e+06		10	22.7	59	1.80701	193.03	89.6316	1.67938e+06
4	54.75	98	1.82313	206.229	85.1252	1.21949e+06		10	22.7	59	1.8076	193.141	89.642	1.67565e+06
4	54.75	98	1.82505	207.905	82.5352	1.38149e+06		10	22.7	59	1.80743	193.109	89.6489	1.67615e+06
4	54.75	98	1.82445	207.474	83.7009	1.36118e+06		10	22.7	59	1.80809	193.161	89.6433	1.67236e+06
4	54.75	98	1.82365	206.706	85.0634	1.19513e+06		10	22.7	59	1.80838	193.151	89.6815	1.67335e+06
4	54.75	98	1.82301	205.312	86.7153	1.04872e+06		10	22.7	59	1.80872	193.199	89.6546	1.67139e+06
4	54.75	98	1.82265	205.211	86.3313	1.14238e+06		10	22.7	59	1.80884	193.221	89.6538	1.67228e+06
4	54.75	98	1.82504	206.899	84.2037	1.19342e+06		10	22.7	59	1.80895	193.235	89.6529	1.67298e+06
5	43.8	88	1.82623	207.4	84.6333	1.09682e+06		10	22.7	59	1.80909	193.386	89.5896	1.66642e+06
4	54.75	98	1.82467	206.627	86.2156	1.01661e+06		10	22.7	59	1.80907	193.303	89.6243	1.66984e+06
4	54.75	98	1.82425	206.925	86.0108	996133		10	22.7	59	1.80848	193.262	89.6119	1.6688e+06
4	54.75	98	1.8245	206.725	86.2853	983434		10	22.7	59	1.80822	193.304	89.6139	1.67005e+06
5	43.8	88	1.82398	206.791	87.8863	933077		10	22.7	59	1.80805	193.276	89.5936	1.67083e+06
4	54.75	98	1.82372	206.887	88.2082	922129		10	22.7	59	1.80817	193.352	89.5747	1.66715e+06
5	43.8	88	1.82431	206.398	87.0609	1.00113e+06		10	22.7	59	1.80845	193.33	89.5568	1.66895e+06
5	43.8	88	1.82453	206.481	86.939	999884		10	22.7	59	1.80886	193.326	89.5631	1.6675e+06
5	43.8	88	1.82524	207.209	85.8429	1.07843e+06		10	22.7	59	1.80946	193.308	89.5837	1.66815e+06
5	43.8	88	1.82486	207.676	85.2329	1.17954e+06		10	22.7	59	1.80997	193.368	89.5909	1.66883e+06
5	43.8	88	1.82456	208.266	84.042	1.28253e+06		10	22.7	59	1.8098	193.373	89.5954	1.6681e+06
4	54.75	98	1.8245	207.918	84.6589	1.1994e+06		10	22.7	59	1.80964	193.253	89.6294	1.66795e+06
4	54.75	98	1.82451	208.154	84.1079	1.29042e+06		10	22.7	59	1.809	193.167	89.6433	1.6692e+06
4	54.75	98	1.82396	208.175	83.6747	1.22104e+06		10	22.7	59	1.809	193.148	89.6747	1.66975e+06
4	55	98	1.82465	208.61	82.3328	1.36209e+06		10	22.7	59	1.80869	193.143	89.6841	1.67048e+06
4	54.75	98	1.82346	208.6	82.2171	1.37607e+06		10	22.7	59	1.80918	193.3	89.6304	1.66649e+06
4	55	98	1.82229	208.899	81.7214	1.43526e+06		10	22.7	59	1.80872	193.272	89.5756	1.66899e+06
4	54.75	98	1.82238	208.087	83.4109	1.33703e+06		10	22.7	59	1.80824	193.121	89.5894	1.66974e+06
4	54.75	98	1.82249	208.771	82.1478	1.42709e+06		10	22.7	59	1.80843	193.12	89.5979	1.67076e+06
4	54.75	98	1.823	208.911	81.8696	1.44551e+06		10	22.7	59	1.80838	193.095	89.6088	1.67133e+06
4	55	98	1.82103	208.867	82.1308	1.35498e+06		10	22.7	59	1.80875	193.189	89.5934	1.67265e+06
4	54.75	98	1.82278	208.315	84.256	1.13406e+06		10	22.7	59	1.8089	193.217	89.5457	1.66634e+06
4	54.75	98	1.82289	208.455	84.0662	1.16676e+06		10	22.7	59	1.80856	193.277	89.521	1.65969e+06
4	55	98	1.82229	208.61	84.8955	1.00504e+06		10	22.7	59	1.80853	193.271	89.5567	1.66222e+06
4	54.75	98	1.82235	208.841	84.0838	1.09486e+06		10	22.7	59	1.80806	193.226	89.5643	1.65846e+06
4	54.75	98	1.82326	208.816	84.4384	1.0704e+06		10	22.7	59	1.80771	193.127	89.5803	1.66076e+06
[truncated: 3,007 more rows]
