# Supplementary material for: Local chromatin fiber folding represses transcription and loop extrusion in quiescent cells
Source: eLife. 2021 Nov 4;10:e72062. doi: 10.7554/eLife.72062 (PMC8598167; doi:10.7554/eLife.72062)
Supplement: Figure 2—figure supplement 3—source data 2. [file elife-72062-fig2-figsupp3-data2.xlsx]

## Sheet: Sheet1
Log						Q
H2A1-tails	H2A2-tails	H2B-tails	H3-tails	H4-tails		H2A1-tails	H2A2-tails	H2B-tails	H3-tails	H4-tails
0.0311	0.0969	0.0197	0.23	0.113		0.0304	0.108	0.0244	0.25	0.123
0.027	0.0896	0.0165	0.221	0.103		0.0269	0.0973	0.018	0.236	0.11
0.0273	0.0923	0.0148	0.223	0.108		0.0313	0.0979	0.0207	0.228	0.115
0.0259	0.0926	0.0158	0.234	0.109		0.0287	0.0904	0.0186	0.227	0.109
0.028	0.0972	0.0186	0.232	0.109		0.0349	0.103	0.0215	0.237	0.115
0.0272	0.0949	0.0145	0.224	0.108		0.0312	0.101	0.0245	0.239	0.115
0.0265	0.0931	0.0122	0.223	0.103		0.0329	0.0942	0.0162	0.224	0.11
0.0302	0.0912	0.0169	0.227	0.11		0.029	0.0921	0.0123	0.21	0.102
0.0302	0.0922	0.0127	0.206	0.0942		0.0287	0.0974	0.026	0.235	0.122
0.0269	0.0867	0.0166	0.212	0.0951		0.0271	0.0904	0.0154	0.226	0.105
0.0274	0.0877	0.0128	0.212	0.101		0.0284	0.0919	0.0216	0.23	0.11
0.0239	0.0887	0.0171	0.234	0.115		0.0266	0.0936	0.0216	0.234	0.117
0.0273	0.0922	0.0127	0.218	0.103		0.0314	0.092	0.0157	0.21	0.106
0.0232	0.0882	0.0189	0.237	0.115		0.032	0.0961	0.0255	0.229	0.113
0.0306	0.0941	0.0169	0.218	0.105		0.0295	0.0963	0.0225	0.234	0.111
0.0276	0.0982	0.0134	0.227	0.109		0.0324	0.0916	0.0104	0.212	0.101
0.0281	0.0939	0.013	0.219	0.0995		0.0336	0.0961	0.019	0.221	0.109
0.0292	0.0961	0.0209	0.239	0.117		0.0331	0.102	0.0214	0.231	0.112
0.0243	0.0902	0.0164	0.219	0.108		0.0273	0.0923	0.0208	0.231	0.115
0.0292	0.0907	0.00659	0.198	0.0884		0.0258	0.0909	0.0167	0.216	0.109
0.0299	0.0866	0.0116	0.207	0.0918		0.0266	0.0913	0.0172	0.223	0.11
0.0256	0.0957	0.0192	0.239	0.114		0.027	0.0958	0.0188	0.238	0.115
0.0262	0.098	0.0129	0.24	0.11		0.0302	0.0977	0.0312	0.244	0.122
0.0265	0.0928	0.0202	0.233	0.112		0.031	0.0966	0.022	0.235	0.118
0.0261	0.0895	0.0159	0.229	0.107		0.0293	0.0987	0.0187	0.234	0.114
0.0284	0.0904	0.0194	0.224	0.105		0.0308	0.106	0.0194	0.24	0.115
0.0279	0.0885	0.00767	0.201	0.0918		0.0307	0.0991	0.0164	0.233	0.115
0.0296	0.0984	0.0229	0.24	0.114		0.0255	0.0927	0.0176	0.233	0.115
0.0267	0.0916	0.0112	0.225	0.105		0.0277	0.0928	0.0148	0.223	0.11
0.0244	0.0908	0.0157	0.218	0.106		0.0297	0.0998	0.0212	0.239	0.118
0.027	0.0965	0.0157	0.231	0.113		0.0298	0.0939	0.0192	0.23	0.113
0.025	0.0898	0.0165	0.227	0.105		0.0287	0.0919	0.0171	0.224	0.115
0.0281	0.0954	0.0169	0.23	0.11		0.0315	0.0989	0.0261	0.234	0.114
0.0252	0.0901	0.0182	0.226	0.11		0.027	0.0954	0.0209	0.236	0.118
0.0274	0.0934	0.0204	0.229	0.114		0.0287	0.0969	0.0175	0.232	0.112
0.03	0.092	0.0152	0.212	0.0989		0.0329	0.1	0.0288	0.239	0.116
0.0259	0.0974	0.0154	0.23	0.112		0.0264	0.0963	0.02	0.235	0.115
0.0332	0.0968	0.0201	0.229	0.11		0.0289	0.0954	0.0193	0.23	0.114
0.0333	0.0995	0.0211	0.246	0.116		0.0268	0.0952	0.0134	0.225	0.108
0.0274	0.0921	0.0142	0.222	0.104		0.0333	0.105	0.0331	0.239	0.12
0.0287	0.0909	0.00869	0.214	0.098		0.0258	0.0939	0.0131	0.228	0.111
0.0253	0.0857	0.0168	0.226	0.109		0.034	0.104	0.0273	0.247	0.125
0.029	0.0896	0.0106	0.215	0.105		0.0294	0.0915	0.0172	0.231	0.111
0.0266	0.083	0.00932	0.205	0.0956		0.0264	0.0918	0.013	0.227	0.104
0.0287	0.0907	0.0131	0.225	0.105		0.0353	0.0948	0.0205	0.223	0.106
0.028	0.098	0.016	0.226	0.111		0.0266	0.0934	0.0143	0.23	0.111
0.0308	0.0886	0.0181	0.224	0.107		0.0312	0.102	0.0285	0.24	0.118
0.027	0.0921	0.0176	0.228	0.113		0.0296	0.0953	0.0217	0.22	0.109
0.029	0.0921	0.0148	0.221	0.104		0.0301	0.0905	0.0197	0.227	0.108
0.0281	0.0953	0.0135	0.215	0.0967		0.0293	0.0968	0.0267	0.231	0.121
0.027722	0.09236	0.0155174	0.2238	0.10614		0.029628	0.096158	0.02015	0.230638	0.113042
0.00216024	0.00373303	0.00358913	0.0104021	0.00690522		0.00255838	0.0043508	0.00492769	0.00876858	0.00533538
