# Supplementary material for: Local chromatin fiber folding represses transcription and loop extrusion in quiescent cells
Source: eLife. 2021 Nov 4;10:e72062. doi: 10.7554/eLife.72062 (PMC8598167; doi:10.7554/eLife.72062)
Supplement: Figure 2—figure supplement 3—source data 3. [file elife-72062-fig2-figsupp3-data3.xlsx]

## Sheet: Sheet1
Log						Q
H2A1-DNA	H2A2-DNA	H2B-DNA	H3-DNA	H4-DNA		H2A1-DNA	H2A2-DNA	H2B-DNA	H3-DNA	H4-DNA
0.0393	0.374	0.0345	0.467	0.161		0.0272	0.34	0.0201	0.397	0.16
0.0258	0.382	0.0228	0.471	0.15		0.0169	0.34	0.012	0.405	0.16
0.0323	0.39	0.0294	0.466	0.152		0.0223	0.346	0.0223	0.403	0.161
0.0347	0.38	0.0286	0.462	0.156		0.0237	0.345	0.0139	0.399	0.16
0.0318	0.382	0.0324	0.46	0.165		0.0263	0.34	0.0191	0.395	0.167
0.0273	0.39	0.0301	0.476	0.157		0.0258	0.352	0.0287	0.396	0.161
0.0217	0.384	0.0163	0.462	0.15		0.0258	0.355	0.0186	0.4	0.161
0.0339	0.378	0.0308	0.465	0.145		0.014	0.355	0.0116	0.416	0.161
0.0314	0.39	0.0273	0.477	0.141		0.0282	0.348	0.0366	0.407	0.162
0.0331	0.39	0.0374	0.479	0.151		0.0225	0.353	0.0163	0.398	0.155
0.0206	0.379	0.024	0.483	0.148		0.0194	0.347	0.0174	0.402	0.162
0.0273	0.373	0.015	0.466	0.154		0.0147	0.347	0.0128	0.402	0.168
0.0209	0.389	0.0111	0.467	0.153		0.0161	0.35	0.0101	0.409	0.149
0.0248	0.383	0.0244	0.464	0.164		0.0253	0.352	0.0266	0.405	0.158
0.0282	0.382	0.0265	0.476	0.155		0.017	0.334	0.0198	0.4	0.154
0.03	0.38	0.0235	0.463	0.16		0.0139	0.363	0.00447	0.403	0.157
0.0341	0.399	0.0258	0.471	0.15		0.0269	0.354	0.0202	0.412	0.164
0.0479	0.381	0.0491	0.466	0.18		0.0244	0.349	0.0214	0.387	0.155
0.0182	0.383	0.0159	0.474	0.148		0.0201	0.361	0.0174	0.4	0.16
0.0193	0.4	0.00366	0.474	0.144		0.0212	0.353	0.0169	0.41	0.158
0.0189	0.389	0.0123	0.474	0.15		0.021	0.353	0.0177	0.402	0.156
0.0456	0.39	0.0498	0.454	0.16		0.0253	0.352	0.0218	0.393	0.165
0.0295	0.373	0.0224	0.467	0.165		0.0358	0.35	0.0422	0.404	0.158
0.0309	0.381	0.0378	0.47	0.163		0.0198	0.351	0.0172	0.394	0.161
0.0292	0.386	0.0202	0.465	0.158		0.0288	0.354	0.0216	0.403	0.168
0.0271	0.381	0.0299	0.474	0.152		0.0265	0.345	0.0289	0.398	0.171
0.016	0.39	0.00921	0.486	0.139		0.0216	0.346	0.00879	0.396	0.155
0.0311	0.375	0.044	0.461	0.164		0.0174	0.352	0.0134	0.399	0.161
0.0276	0.385	0.0241	0.471	0.15		0.0208	0.351	0.0119	0.4	0.157
0.0247	0.382	0.0217	0.476	0.154		0.0257	0.348	0.0231	0.401	0.158
0.0354	0.37	0.0308	0.471	0.166		0.0267	0.353	0.0241	0.409	0.166
0.0334	0.374	0.0357	0.471	0.162		0.0181	0.359	0.0136	0.408	0.153
0.0371	0.379	0.0369	0.467	0.163		0.0254	0.349	0.0267	0.411	0.156
0.0439	0.382	0.0472	0.477	0.154		0.0288	0.359	0.0182	0.406	0.168
0.0359	0.387	0.0264	0.464	0.167		0.0164	0.348	0.0106	0.403	0.157
0.0236	0.378	0.0212	0.477	0.149		0.0335	0.345	0.0351	0.403	0.154
0.0282	0.375	0.0312	0.471	0.158		0.0293	0.35	0.0207	0.409	0.162
0.0431	0.381	0.0388	0.461	0.161		0.0228	0.351	0.0115	0.408	0.16
0.0295	0.375	0.0346	0.461	0.169		0.0229	0.362	0.0143	0.407	0.172
0.0292	0.385	0.0252	0.467	0.149		0.035	0.34	0.0394	0.415	0.171
0.0273	0.385	0.0117	0.472	0.156		0.0261	0.353	0.0202	0.408	0.166
0.0305	0.377	0.0315	0.478	0.163		0.0327	0.342	0.033	0.405	0.164
0.0259	0.389	0.0123	0.47	0.157		0.0145	0.357	0.00643	0.404	0.162
0.0236	0.396	0.0104	0.478	0.144		0.013	0.345	0.0127	0.412	0.164
0.0349	0.377	0.0355	0.475	0.154		0.0222	0.352	0.0251	0.407	0.159
0.0337	0.371	0.0278	0.476	0.152		0.0213	0.356	0.0134	0.402	0.167
0.0266	0.382	0.0238	0.464	0.149		0.0367	0.351	0.0384	0.399	0.155
0.0309	0.38	0.0268	0.467	0.162		0.0247	0.354	0.0203	0.417	0.147
0.0339	0.382	0.0289	0.466	0.151		0.0237	0.354	0.023	0.401	0.155
0.0309	0.383	0.0261	0.47	0.151		0.028	0.347	0.0348	0.41	0.163
0.030014	0.38258	0.0268554	0.4698	0.15552		0.023524	0.350191	0.0202878	0.403375	0.16048
0.0068696	0.00672519	0.0102937	0.00650588	0.00793144		0.00579277	0.00614548	0.00878591	0.00594523	0.00544449
