# Supplementary material for: Local chromatin fiber folding represses transcription and loop extrusion in quiescent cells
Source: eLife. 2021 Nov 4;10:e72062. doi: 10.7554/eLife.72062 (PMC8598167; doi:10.7554/eLife.72062)
Supplement: Figure 2—source data 1. [file elife-72062-fig2-data1.xlsx]

## Sheet: Sheet1
Log						Q
H2A1 - core	H2A2 - core	H2B - core	H3-core	H4-core		H2A1-core	H2A2-core	H2B-core	H3-core	H4-core
0.0446	0.00879	0.0257	0.031	0.0433		0.0471	0.0126	0.0284	0.0644	0.0694
0.0395	0.00851	0.0181	0.0325	0.0376		0.0454	0.0115	0.0199	0.0635	0.0644
0.0422	0.00917	0.0178	0.0333	0.0402		0.0456	0.0125	0.0203	0.066	0.063
0.0399	0.00846	0.0207	0.0322	0.039		0.0457	0.0123	0.0215	0.0597	0.0643
0.0416	0.00908	0.0218	0.0328	0.0427		0.0482	0.0129	0.0212	0.0629	0.0649
0.0435	0.00883	0.0153	0.0303	0.0396		0.0449	0.0119	0.0267	0.0662	0.0632
0.0408	0.00877	0.0116	0.0312	0.0391		0.0483	0.012	0.0161	0.062	0.0586
0.0418	0.00956	0.0187	0.0336	0.041		0.0498	0.0104	0.0128	0.0579	0.0543
0.0418	0.00841	0.0132	0.0306	0.0403		0.0444	0.0118	0.0255	0.065	0.0613
0.043	0.00865	0.0176	0.0324	0.0403		0.0446	0.0107	0.0166	0.0641	0.0579
0.0456	0.00938	0.012	0.032	0.0402		0.0457	0.0113	0.0244	0.0615	0.0583
0.0403	0.00843	0.0203	0.0328	0.0364		0.0459	0.012	0.0231	0.0642	0.0593
0.0449	0.00978	0.0142	0.0318	0.042		0.049	0.0119	0.0146	0.0629	0.0604
0.0386	0.00829	0.0241	0.033	0.0407		0.0467	0.0116	0.0262	0.0644	0.0667
0.0453	0.00996	0.0168	0.0313	0.0429		0.0446	0.0115	0.024	0.0616	0.0623
0.0431	0.00912	0.0139	0.0325	0.0387		0.0497	0.0121	0.00677	0.0604	0.0558
0.041	0.00903	0.0136	0.0297	0.042		0.0494	0.0118	0.0195	0.059	0.0597
0.0409	0.00933	0.0249	0.0315	0.0419		0.0489	0.0125	0.0202	0.0611	0.0631
0.0424	0.00881	0.0176	0.031	0.0388		0.046	0.0112	0.0263	0.0654	0.0596
0.0463	0.00964	0.00608	0.0296	0.0415		0.0465	0.0113	0.0173	0.0627	0.0569
0.0444	0.00898	0.0106	0.0295	0.0411		0.044	0.0107	0.0179	0.062	0.0568
0.0396	0.00842	0.0245	0.0329	0.0454		0.0442	0.0122	0.0171	0.0638	0.0593
0.0395	0.00863	0.0177	0.0317	0.0368		0.0423	0.0118	0.0307	0.0638	0.0691
0.0417	0.00818	0.0219	0.0299	0.0393		0.0475	0.0116	0.023	0.0668	0.0609
0.041	0.00875	0.0166	0.0342	0.0362		0.0467	0.0118	0.0204	0.063	0.0601
0.0433	0.00904	0.0193	0.0316	0.0397		0.05	0.0123	0.0166	0.0637	0.0647
0.0439	0.00946	0.00758	0.0288	0.0394		0.0462	0.0113	0.0176	0.0642	0.0576
0.0412	0.00906	0.0236	0.0325	0.0444		0.0423	0.0107	0.0177	0.0657	0.0568
0.0395	0.00895	0.0129	0.0299	0.0415		0.0449	0.0107	0.0151	0.0633	0.0567
0.0438	0.0081	0.0199	0.03	0.0394		0.0475	0.0121	0.0227	0.061	0.0615
0.0428	0.00892	0.0204	0.0314	0.0415		0.0436	0.0124	0.019	0.0597	0.0566
0.0405	0.00896	0.0183	0.033	0.0391		0.0476	0.0125	0.0193	0.0612	0.0601
0.0411	0.00899	0.0179	0.0313	0.0416		0.0507	0.012	0.0278	0.0613	0.067
0.0396	0.00781	0.0198	0.0308	0.0404		0.043	0.0111	0.0255	0.0652	0.0592
0.0447	0.00912	0.0229	0.0333	0.0404		0.049	0.0117	0.0199	0.061	0.0608
0.0479	0.00968	0.0163	0.0304	0.044		0.0452	0.0123	0.0298	0.0651	0.0689
0.0428	0.00873	0.0172	0.0297	0.0416		0.0455	0.0115	0.0228	0.0576	0.0606
0.0446	0.00906	0.0239	0.0318	0.0432		0.046	0.0114	0.0216	0.0661	0.0639
0.0377	0.00754	0.0252	0.0325	0.0401		0.0468	0.0112	0.0145	0.0599	0.0559
0.0447	0.00875	0.0197	0.0311	0.0427		0.0451	0.0117	0.0347	0.0649	0.0688
0.039	0.00866	0.00802	0.0309	0.0375		0.0456	0.0125	0.0144	0.0603	0.0567
0.0389	0.00865	0.0236	0.0311	0.038		0.0456	0.0131	0.0303	0.0634	0.0668
0.0418	0.00812	0.0132	0.032	0.0367		0.0477	0.00997	0.0198	0.0633	0.0574
0.0427	0.0088	0.0113	0.0317	0.0381		0.0457	0.0106	0.0126	0.0581	0.0558
0.0408	0.00885	0.0147	0.0315	0.0397		0.0497	0.0117	0.0193	0.0598	0.0637
0.0416	0.00889	0.0185	0.0307	0.0411		0.0442	0.0118	0.0144	0.0611	0.0566
0.0425	0.00837	0.0205	0.0338	0.0391		0.0432	0.0122	0.0263	0.0629	0.0678
0.0434	0.00953	0.0192	0.0338	0.037		0.0457	0.0109	0.0238	0.0609	0.0568
0.0411	0.00903	0.0191	0.0329	0.0414		0.0452	0.0118	0.0213	0.0635	0.0573
0.0444	0.00945	0.0117	0.0311	0.0407		0.0475	0.0113	0.0306	0.0621	0.0598
0.042152	0.0088696	0.0175996	0.031618	0.040306		0.046292	0.0116869	0.0212014	0.062592	0.0609872
0.00220651	0.000496477	0.00481434	0.00128408	0.00211722		0.00207992	0.000680029	0.00562597	0.00230021	0.00408968
