# Supplementary material for: Local chromatin fiber folding represses transcription and loop extrusion in quiescent cells
Source: eLife. 2021 Nov 4;10:e72062. doi: 10.7554/eLife.72062 (PMC8598167; doi:10.7554/eLife.72062)
Supplement: Figure 3—source data 1. [file elife-72062-fig3-data1.xlsx]

## Sheet: DAPI Volume
DAPI volume measurements
Strain:	5781 G1	5783 G1	5781	5783	5781 + TSA	5783 + TSA
	0.5375	0.52847	0.416	0.418	0.427	0.416
	0.54167	0.53958	0.42	0.419	0.438	0.42
	0.55556	0.54653	0.421	0.423	0.448	0.423
	0.55625	0.54931	0.422	0.43	0.45	0.425
	0.58611	0.55139	0.427	0.431	0.461	0.426
	0.59167	0.55625	0.428	0.448	0.472	0.428
	0.60694	0.575	0.433	0.457	0.483	0.431
	0.61042	0.59514	0.434	0.466	0.485	0.431
	0.61528	0.60486	0.436	0.484	0.495	0.431
	0.62778	0.61597	0.441	0.484	0.5	0.434
	0.65417	0.62222	0.444	0.505	0.514	0.439
	0.66875	0.625	0.445	0.515	0.525	0.444
	0.67569	0.63472	0.448	0.533	0.53	0.445
	0.68264	0.65	0.449	0.534	0.54	0.448
	0.69722	0.65208	0.46	0.535	0.551	0.449
	0.70972	0.65278	0.469	0.535	0.563	0.453
	0.71806	0.65417	0.47	0.54	0.568	0.454
	0.72361	0.65694	0.474	0.543	0.569	0.457
	0.72361	0.65903	0.482	0.547	0.572	0.46
	0.73403	0.67569	0.482	0.552	0.595	0.46
	0.73542	0.68889	0.483	0.553	0.596	0.46
	0.73958	0.69583	0.486	0.557	0.601	0.479
	0.74167	0.70694	0.487	0.563	0.601	0.48
	0.75556	0.70903	0.487	0.565	0.603	0.482
	0.75972	0.71667	0.488	0.573	0.612	0.486
	0.78264	0.71944	0.491	0.581	0.614	0.487
	0.78264	0.72153	0.491	0.581	0.617	0.488
	0.80139	0.73542	0.492	0.585	0.626	0.489
	0.80625	0.73681	0.497	0.591	0.631	0.49
	0.82014	0.7375	0.498	0.596	0.633	0.494
	0.82014	0.74375	0.499	0.6	0.635	0.497
	0.82153	0.74375	0.502	0.602	0.635	0.498
	0.825	0.74722	0.512	0.606	0.643	0.498
	0.82639	0.75556	0.512	0.609	0.646	0.502
	0.82986	0.75764	0.515	0.614	0.652	0.507
	0.83056	0.7625	0.517	0.616	0.654	0.508
	0.84931	0.76389	0.517	0.616	0.657	0.508
	0.85	0.76875	0.517	0.617	0.664	0.509
	0.85139	0.76944	0.52	0.63	0.67	0.51
	0.85694	0.77153	0.527	0.631	0.672	0.511
	0.85764	0.77222	0.527	0.632	0.672	0.511
	0.85833	0.77361	0.527	0.633	0.676	0.511
	0.86389	0.77361	0.529	0.635	0.678	0.514
	0.87778	0.77431	0.529	0.636	0.679	0.518
	0.87986	0.77569	0.529	0.638	0.681	0.521
	0.88194	0.77639	0.53	0.642	0.682	0.522
	0.88889	0.77708	0.531	0.642	0.69	0.529
	0.89306	0.77847	0.532	0.644	0.69	0.531
	0.89861	0.78125	0.539	0.645	0.692	0.533
	0.90069	0.78264	0.54	0.654	0.698	0.534
	0.90694	0.78403	0.546	0.655	0.698	0.54
	0.91389	0.78542	0.55	0.655	0.698	0.543
	0.91597	0.7875	0.55	0.667	0.7	0.546
	0.93194	0.7875	0.554	0.669	0.7	0.552
	0.93194	0.79653	0.557	0.678	0.701	0.558
	0.93264	0.79931	0.562	0.679	0.71	0.561
	0.93681	0.80556	0.562	0.681	0.714	0.561
	0.94167	0.81736	0.565	0.681	0.716	0.563
	0.94514	0.81806	0.565	0.682	0.716	0.563
	0.94653	0.81944	0.565	0.683	0.719	0.567
	0.94792	0.82222	0.566	0.689	0.721	0.567
	0.94931	0.82222	0.566	0.693	0.727	0.568
	0.95347	0.82222	0.567	0.696	0.73	0.57
	0.95972	0.82292	0.569	0.704	0.731	0.57
	0.96528	0.82431	0.57	0.708	0.733	0.571
	0.97917	0.82431	0.57	0.71	0.734	0.574
	0.98125	0.825	0.57	0.711	0.734	0.574
	0.98611	0.82708	0.572	0.715	0.737	0.578
	0.99167	0.83403	0.573	0.724	0.739	0.579
	0.99167	0.83542	0.573	0.725	0.74	0.58
	0.99583	0.83542	0.574	0.728	0.74	0.583
	1.00625	0.83681	0.577	0.728	0.743	0.585
	1.01458	0.83889	0.577	0.73	0.745	0.587
	1.01458	0.83889	0.582	0.734	0.747	0.588
	1.02292	0.84028	0.585	0.735	0.748	0.588
	1.02639	0.84097	0.586	0.735	0.748	0.59
	1.02708	0.84375	0.588	0.737	0.752	0.591
	1.02917	0.84931	0.589	0.738	0.753	0.599
	1.03819	0.84931	0.592	0.74	0.757	0.6
	1.05208	0.85	0.594	0.741	0.759	0.605
	1.06528	0.85486	0.594	0.744	0.763	0.607
	1.07014	0.85486	0.598	0.745	0.768	0.611
	1.07292	0.85556	0.598	0.748	0.769	0.613
	1.07639	0.86319	0.598	0.758	0.769	0.615
	1.07778	0.86319	0.6	0.761	0.771	0.615
	1.07917	0.86319	0.602	0.765	0.774	0.617
	1.08125	0.86667	0.605	0.77	0.775	0.617
	1.08264	0.86806	0.608	0.771	0.779	0.619
	1.08403	0.86875	0.608	0.773	0.78	0.62
	1.08472	0.87083	0.608	0.777	0.781	0.62
	1.08472	0.87222	0.609	0.778	0.783	0.621
	1.08542	0.87708	0.611	0.786	0.784	0.621
	1.08611	0.87708	0.611	0.787	0.784	0.622
	1.08681	0.87847	0.614	0.787	0.786	0.622
	1.08819	0.87917	0.614	0.787	0.787	0.623
	1.09306	0.87986	0.621	0.788	0.796	0.623
	1.10278	0.88472	0.621	0.788	0.799	0.623
	1.1125	0.88681	0.621	0.814	0.801	0.625
	1.11597	0.88958	0.621	0.818	0.811	0.625
	1.11806	0.89097	0.623	0.828	0.812	0.627
	1.12153	0.89306	0.623	0.835	0.814	0.627
	1.12569	0.89514	0.624	0.836	0.815	0.627
	1.12847	0.89792	0.626	0.863	0.818	0.629
	1.13264	0.9	0.626	0.871	0.82	0.629
	1.13542	0.90069	0.628	0.871	0.827	0.629
	1.13542	0.90069	0.633	0.894	0.828	0.63
	1.13819	0.90278	0.634	0.898	0.829	0.631
	1.14167	0.90486	0.634	0.904	0.83	0.633
	1.14653	0.90903	0.635	0.917	0.831	0.635
	1.14861	0.90903	0.635	0.922	0.833	0.636
	1.14861	0.90903	0.635	0.926	0.836	0.637
	1.15347	0.91111	0.638	0.936	0.838	0.637
	1.16458	0.91111	0.639	0.968	0.84	0.64
	1.16667	0.91181	0.64	0.999	0.843	0.64
	1.175	0.91181	0.642	1.006	0.844	0.64
	1.17847	0.91181	0.642		0.848	0.642
	1.17986	0.9125	0.644		0.85	0.642
	1.18125	0.91597	0.646		0.851	0.646
	1.18681	0.91806	0.646		0.852	0.647
	1.18819	0.91806	0.649		0.852	0.647
	1.19722	0.91806	0.65		0.853	0.647
	1.19861	0.91875	0.651		0.856	0.648
	1.19861	0.91944	0.654		0.857	0.649
	1.21944	0.92153	0.654		0.857	0.649
	1.22153	0.92361	0.656		0.859	0.649
	1.22708	0.92361	0.657		0.86	0.649
	1.23194	0.925	0.658		0.865	0.651
	1.23333	0.92639	0.658		0.869	0.654
	1.23819	0.92986	0.659		0.87	0.654
	1.24792	0.93333	0.66		0.873	0.654
	1.24792	0.94097	0.663		0.875	0.656
	1.25278	0.94167	0.665		0.875	0.658
	1.25417	0.94167	0.667		0.876	0.66
	1.25694	0.94167	0.668		0.877	0.66
	1.2625	0.94653	0.674		0.879	0.661
	1.26319	0.94792	0.678		0.88	0.666
	1.26528	0.95069	0.68		0.881	0.671
	1.27222	0.95069	0.681		0.883	0.671
	1.2875	0.95139	0.682		0.884	0.672
	1.29792	0.95139	0.683		0.884	0.672
	1.3125	0.95278	0.683		0.887	0.674
	1.31806	0.95278	0.689		0.891	0.676
	1.32361	0.95278	0.69		0.892	0.676
	1.325	0.95625	0.692		0.898	0.677
	1.32569	0.95625	0.694		0.902	0.677
	1.3375	0.95625	0.694		0.903	0.678
	1.33889	0.95764	0.695		0.904	0.678
	1.34236	0.95833	0.697		0.906	0.681
	1.36042	0.96111	0.703		0.908	0.681
	1.36181	0.9625	0.705		0.908	0.682
	1.36875	0.96319	0.708		0.908	0.682
	1.37153	0.96458	0.708		0.91	0.682
	1.37153	0.96528	0.711		0.91	0.682
	1.37847	0.96667	0.712		0.911	0.683
	1.38264	0.96944	0.712		0.913	0.683
	1.38681	0.97083	0.714		0.918	0.684
	1.39167	0.97153	0.716		0.919	0.684
	1.39444	0.97222	0.717		0.921	0.686
	1.40972	0.97361	0.72		0.921	0.686
	1.41458	0.97431	0.724		0.921	0.687
	1.45556	0.97431	0.727		0.923	0.687
	1.45833	0.975	0.727		0.925	0.689
	1.45903	0.97778	0.731		0.926	0.69
	1.45903	0.98056	0.732		0.926	0.69
	1.46944	0.98264	0.733		0.93	0.692
	1.47083	0.98403	0.734		0.931	0.693
	1.47431	0.98611	0.736		0.932	0.694
	1.52708	0.98819	0.737		0.932	0.695
	1.55486	0.99167	0.737		0.934	0.697
	1.56875	0.99167	0.74		0.934	0.698
	1.58889	0.99375	0.741		0.935	0.701
	1.59167	0.99444	0.741		0.935	0.702
	1.59236	0.99444	0.742		0.936	0.704
	1.59444	0.99514	0.745		0.942	0.706
	1.62153	0.99653	0.756		0.942	0.706
	1.67292	0.99722	0.756		0.943	0.706
	1.68889	0.99722	0.757		0.95	0.707
	1.69306	0.99861	0.758		0.954	0.707
	1.70486	1.00139	0.76		0.954	0.709
	1.70694	1.00833	0.762		0.955	0.709
	1.73264	1.00833	0.762		0.957	0.711
	1.74236	1.00903	0.763		0.96	0.712
		1.01042	0.764		0.962	0.712
		1.01042	0.767		0.974	0.714
		1.01528	0.767		0.974	0.714
		1.01597	0.77		0.975	0.716
		1.01597	0.771		0.976	0.716
		1.01736	0.771		0.977	0.719
		1.01944	0.772		0.978	0.722
		1.01944	0.773		0.979	0.723
		1.02014	0.773		0.98	0.723
		1.02222	0.775		0.981	0.723
		1.02292	0.777		0.99	0.724
		1.02292	0.781		0.994	0.727
		1.02431	0.783		0.998	0.727
		1.025	0.783		1.007	0.727
		1.02847	0.784		1.008	0.728
		1.02917	0.786		1.014	0.729
		1.03056	0.787		1.016	0.731
		1.03056	0.787		1.017	0.731
		1.03056	0.787		1.018	0.731
		1.03056	0.788		1.021	0.731
		1.03125	0.789		1.023	0.731
		1.03333	0.794		1.029	0.732
		1.03333	0.794		1.03	0.732
		1.03403	0.794		1.031	0.733
		1.04097	0.795		1.033	0.734
		1.04306	0.797		1.044	0.735
		1.04444	0.798		1.047	0.735
		1.04722	0.799		1.056	0.735
		1.04722	0.8		1.057	0.736
		1.04931	0.801		1.06	0.737
		1.05	0.805		1.068	0.737
		1.05	0.805		1.073	0.738
		1.05347	0.81		1.082	0.738
		1.05417	0.815		1.087	0.738
		1.05694	0.817		1.088	0.74
		1.05903	0.817		1.089	0.74
		1.06181	0.818		1.102	0.742
		1.06528	0.82		1.106	0.743
		1.06875	0.82		1.106	0.743
		1.07014	0.821		1.113	0.744
		1.07222	0.829		1.116	0.744
		1.07569	0.832		1.117	0.746
		1.07917	0.833		1.124	0.746
		1.07986	0.842		1.125	0.746
		1.08125	0.845		1.136	0.746
		1.08403	0.846		1.154	0.746
		1.08611	0.848		1.154	0.747
		1.08819	0.859		1.156	0.747
		1.08889	0.86		1.158	0.748
		1.09028	0.861		1.166	0.749
		1.09167	0.866		1.171	0.749
		1.09167	0.867		1.201	0.749
		1.09306	0.879		1.204	0.749
		1.09306	0.881		1.224	0.75
		1.09306	0.884		1.249	0.751
		1.09444	0.885		1.255	0.752
		1.09931	0.89		1.257	0.753
		1.1	0.89		1.319	0.754
		1.10278	0.891		1.34	0.756
		1.10278	0.893			0.757
		1.10417	0.896			0.759
		1.10417	0.907			0.759
		1.10556	0.908			0.759
		1.10903	0.923			0.76
		1.10972	0.927			0.76
		1.1125	0.928			0.76
		1.11458	0.929			0.761
		1.11458	0.932			0.763
		1.11597	0.936			0.766
		1.11806	0.95			0.767
		1.11875	0.954			0.767
		1.12083	0.954			0.767
		1.12083	0.956			0.768
		1.125	0.961			0.768
		1.125	0.963			0.768
		1.12569	0.995			0.768
		1.12708	1.002			0.769
		1.12847	1.009			0.769
		1.13056	1.02			0.769
		1.13194	1.066			0.77
		1.1375	1.098			0.77
		1.13889	1.116			0.771
		1.13889	1.136			0.773
		1.14236	1.191			0.775
		1.14444				0.775
		1.14653				0.776
		1.14722				0.776
		1.15069				0.776
		1.15139				0.777
		1.15278				0.779
		1.15486				0.779
		1.15694				0.779
		1.15764				0.78
		1.16389				0.78
		1.17153				0.781
		1.17153				0.782
		1.17361				0.782
		1.17569				0.783
		1.17639				0.785
		1.18056				0.787
		1.18125				0.787
		1.18333				0.787
		1.18542				0.788
		1.18542				0.789
		1.18958				0.789
		1.19028				0.79
		1.19028				0.792
		1.19236				0.793
		1.19722				0.794
		1.19861				0.794
		1.19931				0.796
		1.20069				0.796
		1.20347				0.796
		1.20625				0.797
		1.2125				0.797
		1.21319				0.798
		1.21458				0.799
		1.21736				0.8
		1.21806				0.801
		1.22153				0.801
		1.22361				0.801
		1.225				0.802
		1.23611				0.802
		1.24028				0.802
		1.24028				0.802
		1.24097				0.803
		1.24097				0.803
		1.24653				0.804
		1.24653				0.807
		1.24792				0.808
		1.25				0.808
		1.25208				0.809
		1.25417				0.809
		1.26111				0.81
		1.26181				0.81
		1.26528				0.812
		1.26528				0.813
		1.27014				0.813
		1.27292				0.814
		1.27292				0.815
		1.27431				0.815
		1.27708				0.815
		1.27917				0.815
		1.27917				0.816
		1.27917				0.817
		1.27986				0.817
		1.28125				0.818
		1.28194				0.819
		1.28333				0.819
		1.28403				0.819
		1.28403				0.82
		1.28611				0.821
		1.29167				0.821
		1.29306				0.822
		1.29306				0.824
		1.29792				0.825
		1.30069				0.825
		1.30278				0.826
		1.30417				0.826
		1.30486				0.826
		1.30486				0.83
		1.30764				0.83
		1.30972				0.831
		1.31111				0.831
		1.31389				0.832
		1.31389				0.833
		1.31597				0.834
		1.32014				0.836
		1.325				0.836
		1.32569				0.837
		1.33472				0.838
		1.33472				0.839
		1.33889				0.84
		1.33958				0.842
		1.34097				0.843
		1.34583				0.846
		1.35069				0.848
		1.35139				0.848
		1.35278				0.849
		1.35486				0.849
		1.35694				0.853
		1.35903				0.853
		1.36389				0.856
		1.36458				0.856
		1.36597				0.857
		1.37361				0.858
		1.37639				0.858
		1.37778				0.859
		1.37986				0.859
		1.38056				0.859
		1.38333				0.86
		1.38681				0.86
		1.38958				0.862
		1.39583				0.864
		1.40069				0.865
		1.40139				0.865
		1.40556				0.866
		1.40625				0.867
		1.40764				0.868
		1.40833				0.868
		1.41458				0.87
		1.41458				0.871
		1.41528				0.872
		1.41736				0.873
		1.42222				0.873
		1.42361				0.874
		1.43333				0.874
		1.4375				0.875
		1.43958				0.876
		1.43958				0.877
		1.44514				0.877
		1.44514				0.877
		1.45139				0.877
		1.45208				0.88
		1.45347				0.88
		1.45556				0.883
		1.45625				0.884
		1.46597				0.885
		1.46944				0.885
		1.47014				0.886
		1.47083				0.887
		1.47847				0.888
		1.47917				0.889
		1.48681				0.889
		1.48819				0.889
		1.49792				0.891
		1.50694				0.892
		1.50972				0.893
		1.51111				0.893
		1.51528				0.893
		1.51597				0.894
		1.52083				0.894
		1.53889				0.894
		1.53889				0.894
		1.54375				0.895
		1.55				0.896
		1.55278				0.896
		1.55556				0.897
		1.55556				0.9
		1.58403				0.901
		1.59028				0.901
		1.59236				0.901
		1.59653				0.902
		1.59792				0.902
		1.60833				0.902
		1.61944				0.902
		1.63056				0.904
		1.64861				0.905
		1.65139				0.905
		1.67153				0.906
		1.69931				0.907
		1.69931				0.907
		1.71181				0.908
		1.71389				0.908
		1.74306				0.909
		1.81528				0.909
		1.85139				0.91
						0.911
						0.911
						0.912
						0.913
						0.913
						0.915
						0.915
						0.915
						0.917
						0.917
						0.919
						0.919
						0.919
						0.92
						0.921
						0.921
						0.923
						0.924
						0.926
						0.927
						0.928
						0.928
						0.93
						0.93
						0.931
						0.932
						0.932
						0.932
						0.934
						0.934
						0.935
						0.935
						0.937
						0.937
						0.938
						0.938
						0.939
						0.939
						0.941
						0.941
						0.942
						0.947
						0.947
						0.95
						0.95
						0.953
						0.954
						0.955
						0.955
						0.957
						0.957
						0.957
						0.958
						0.959
						0.96
						0.961
						0.961
						0.961
						0.961
						0.962
						0.962
						0.963
						0.964
						0.965
						0.965
						0.965
						0.965
						0.966
						0.966
						0.967
						0.968
						0.968
						0.969
						0.97
						0.97
						0.971
						0.971
						0.972
						0.973
						0.973
						0.975
						0.975
						0.982
						0.982
						0.983
						0.984
						0.984
						0.995
						0.997
						0.997
						0.999
						1
						1.005
						1.005
						1.007
						1.01
						1.01
						1.013
						1.014
						1.015
						1.016
						1.018
						1.019
						1.02
						1.021
						1.021
						1.024
						1.025
						1.027
						1.03
						1.03
						1.031
						1.031
						1.04
						1.041
						1.044
						1.045
						1.047
						1.049
						1.05
						1.05
						1.052
						1.053
						1.054
						1.055
						1.057
						1.06
						1.06
						1.06
						1.06
						1.061
						1.063
						1.065
						1.066
						1.067
						1.071
						1.071
						1.074
						1.075
						1.076
						1.077
						1.077
						1.078
						1.08
						1.08
						1.081
						1.081
						1.081
						1.082
						1.085
						1.086
						1.088
						1.089
						1.094
						1.094
						1.107
						1.109
						1.109
						1.112
						1.114
						1.114
						1.115
						1.118
						1.119
						1.124
						1.125
						1.127
						1.13
						1.132
						1.133
						1.135
						1.137
						1.138
						1.144
						1.147
						1.153
						1.156
						1.161
						1.161
						1.162
						1.162
						1.163
						1.163
						1.168
						1.169
						1.177
						1.177
						1.178
						1.179
						1.179
						1.182
						1.183
						1.188
						1.189
						1.191
						1.196
						1.196
						1.199
						1.199
						1.203
						1.204
						1.208
						1.213
						1.215
						1.215
						1.216
						1.216
						1.221
						1.223
						1.223
						1.225
						1.231
						1.231
						1.232
						1.234
						1.234
						1.235
						1.243
						1.245
						1.248
						1.259
						1.277
						1.294
						1.301
						1.304
						1.313
						1.329
						1.339
						1.343
						1.349
						1.35
						1.352
						1.352
						1.352
						1.362
						1.367
						1.37
						1.377
						1.382
						1.388
						1.389
						1.394
						1.4
