# Supplementary material for: Local chromatin fiber folding represses transcription and loop extrusion in quiescent cells
Source: eLife. 2021 Nov 4;10:e72062. doi: 10.7554/eLife.72062 (PMC8598167; doi:10.7554/eLife.72062)
Supplement: Figure 4—figure supplement 1—source data 1. [file elife-72062-fig4-figsupp1-data1.xlsx]

## Sheet: Sheet 1
Q cells relative to WT
	Q
HHF2	1	1
K16A	0.412281	0.38587
K16Q	0.346491	0.269022
R17R19A	0.513158	0.315217
5toA	0.197368	0.108696
