# Supplementary material for: Local chromatin fiber folding represses transcription and loop extrusion in quiescent cells
Source: eLife. 2021 Nov 4;10:e72062. doi: 10.7554/eLife.72062 (PMC8598167; doi:10.7554/eLife.72062)
Supplement: Figure 4—figure supplement 1—source data 2. [file elife-72062-fig4-figsupp1-data2.xlsx]

## Sheet: Sheet1
Longevity
Week	Q						HHF2						5toA
0	100						100						100
1	95.5209	94.2414	96.2441	98.6825			87.6675	97.4084	98.0081	106.574			100.625	91.0572	91.0572
2	86.4629	84.3307	93.6638	93.2806	80.8854	77.3051	75.3227	87.1722	86.8882	94.136	66.2367	74.9917	87.3438	95.2562	85.8493	97.9608	68.3229
3	75.4835	80.8047	80.3754	77.4897			50.7933	53.1471	79.2403	76.3102			66.0747	76.4762	77.2929
4	65.5301	56.3184	50.1808	54.6606	53.9028	53.2644	19.9855	28.9231	61.1646	48.775	48.1267	26.8132	20.8802	51.7758	41.1701	25.4039	29.2073
5	42.0592	30.2626	24.1552	28.3956			4.4627	14.0859	35.9482	31.4817			5.44799	28.743	15.9696
6	21.7129	13.9422	6.86973	9.83066	12.0787	6.01631	0.774862	10.3614	12.5058	17.3576	7.48584	1.82357	2.06395	10.3416	2.67335	2.17794	1.93099
8	0.843412	0.730574	0.55816	0.0743228			0.944995	1.27167	0.575376	0.108885			0.80663	0.189295	0.1058	0.0478398
