# Supplementary material for: Local chromatin fiber folding represses transcription and loop extrusion in quiescent cells
Source: eLife. 2021 Nov 4;10:e72062. doi: 10.7554/eLife.72062 (PMC8598167; doi:10.7554/eLife.72062)
Supplement: Figure 4—figure supplement 1—source data 3. [file elife-72062-fig4-figsupp1-data3.xlsx]

## Sheet: Sheet1
DAPI volume measurements
Strain:	6767	6773	6618	6765	6768	6774	6769	6776	6772	6779
	0.595556	0.545625	0.564764	0.59204	0.632883	0.717136	0.666667	0.676692	0.559259	0.553
	0.600741	0.605625	0.66424	0.717187	0.727461	0.763952	0.751852	0.763158	0.581481	0.585
	0.607407	0.614375	0.681087	0.77976	0.777114	0.780976	0.76	0.771429	0.612593	0.655
	0.60963	0.638125	0.697933	0.790991	0.782631	0.806512	0.76	0.777273	0.646667	0.664
	0.611852	0.650625	0.705956	0.807036	0.796818	0.843752	0.786667	0.798496	0.74963	0.664
	0.615556	0.6575	0.723604	0.85918	0.822039	0.852264	0.842222	0.854887	0.764444	0.717
	0.622963	0.661875	0.72922	0.870411	0.829132	0.878864	0.862222	0.881818	0.766667	0.728
	0.624444	0.68875	0.763716	0.877631	0.850412	0.900144	0.86963	0.889394	0.786667	0.745
	0.634074	0.691875	0.788584	0.901698	0.854353	0.903336	0.88963	0.903008	0.791852	0.758
	0.634074	0.71125	0.800618	0.905709	0.896124	0.953344	0.896296	0.915789	0.806667	0.761
	0.637037	0.71375	0.811047	0.908116	0.912676	0.960792	0.9	0.918755	0.817778	0.763
	0.641481	0.76625	0.817464	0.92416	0.914252	0.96824	0.902222	0.922551	0.817778	0.771
	0.643704	0.769375	0.854367	0.940204	0.915828	0.985264	0.908148	0.924812	0.828148	0.773
	0.645185	0.781875	0.864796	0.942611	0.92371	0.991648	0.911111	0.928788	0.845926	0.784
	0.64963	0.783125	0.892071	0.949831	0.926074	1.00016	0.921481	0.944571	0.848148	0.794
	0.653333	0.78375	0.896884	0.955447	0.933167	1.00229	0.926667	0.947727	0.84963	0.803
	0.654074	0.785625	0.907313	0.985129	0.943413	1.00548	0.931852	0.95303	0.864444	0.806
	0.657037	0.791875	0.908116	0.997964	0.949719	1.01399	0.936296	0.959757	0.911111	0.807
	0.664444	0.80375	0.90972	1.0108	0.954447	1.02357	0.948889	0.967669	0.911111	0.808
	0.666667	0.806875	0.915336	1.01401	0.96627	1.08634	0.948889	0.970455	0.928889	0.808
	0.671111	0.815	0.923358	1.01962	0.972575	1.08634	0.948889	0.970455	0.931852	0.811
	0.678519	0.8275	0.92416	1.03406	0.995431	1.09379	0.953333	0.970455	0.938519	0.817
	0.678519	0.83375	0.928171	1.03406	0.996219	1.09486	0.953333	0.975	0.96963	0.818
	0.683704	0.848125	0.930578	1.03727	1.0041	1.11507	0.967407	0.991648	0.979259	0.834
	0.685185	0.851875	0.930578	1.04369	1.00804	1.13316	0.977037	0.993985	0.982222	0.853
	0.696296	0.860625	0.946622	1.05011	1.00804	1.14699	0.979259	0.996992	0.991852	0.853
	0.7	0.86625	0.947424	1.05252	1.0238	1.17891	0.979259	0.999242	1.01111	0.859
	0.701481	0.871875	0.954644	1.05572	1.04193	1.20658	0.979259	1.00151	1.0163	0.859
	0.711111	0.885	0.954644	1.06455	1.04193	1.2385	0.98	1.00151	1.02	0.861
	0.712593	0.889375	0.965876	1.07016	1.04508	1.24594	0.982222	1.00227	1.03185	0.867
	0.712593	0.890625	0.970689	1.07738	1.04981	1.24914	0.991852	1.0167	1.03556	0.871
	0.712593	0.90375	0.973898	1.07819	1.0506	1.25339	0.994074	1.01898	1.04296	0.873
	0.715556	0.918125	0.977107	1.09102	1.05927	1.26722	1.0037	1.02652	1.05778	0.893
	0.724444	0.919375	0.985129	1.12552	1.07976	1.26935	1.00889	1.03417	1.06519	0.893
	0.725185	0.93375	0.986733	1.13354	1.08528	1.27999	1.00963	1.03493	1.06815	0.899
	0.732593	0.94	0.987536	1.13354	1.08528	1.27999	1.01926	1.0448	1.06889	0.9
	0.732593	0.94	0.98914	1.13916	1.08764	1.28212	1.02593	1.04924	1.07111	0.906
	0.737037	0.940625	0.989942	1.14076	1.10183	1.28425	1.03111	1.05455	1.07111	0.912
	0.742222	0.94625	0.993151	1.14878	1.10577	1.28531	1.03926	1.06165	1.09037	0.917
	0.742963	0.946875	0.994756	1.1536	1.11129	1.30978	1.04148	1.0653	1.09556	0.923
	0.747407	0.9475	0.999569	1.1544	1.12705	1.31723	1.04296	1.06758	1.12296	0.923
	0.757037	0.96375	1.00599	1.156	1.13414	1.31723	1.04593	1.0691	1.12519	0.925
	0.757037	0.966875	1.00839	1.16483	1.1373	1.32681	1.05185	1.07803	1.12963	0.926
	0.761481	0.969375	1.01401	1.18167	1.14124	1.33319	1.05407	1.07821	1.13185	0.939
	0.777037	0.973125	1.01401	1.21216	1.14203	1.35128	1.05778	1.08346	1.13852	0.943
	0.782222	0.98	1.01401	1.22098	1.14203	1.35128	1.06074	1.08428	1.14444	0.953
	0.793333	0.9875	1.01561	1.22499	1.14754	1.36086	1.06148	1.08732	1.14889	0.957
	0.795556	0.9875	1.01642	1.23061	1.15227	1.38746	1.06519	1.08808	1.16593	0.96
	0.804444	0.988125	1.02123	1.23382	1.15306	1.38746	1.06741	1.08939	1.17407	0.972
	0.805926	0.988125	1.02364	1.23622	1.157	1.40874	1.06815	1.09491	1.18815	0.983
	0.81037	0.990625	1.03005	1.24184	1.1704	1.41938	1.07111	1.09546	1.1963	0.992
	0.812593	1.00125	1.03005	1.24665	1.18143	1.45236	1.07778	1.10226	1.2037	0.995
	0.821481	1.00937	1.03406	1.24746	1.18143	1.463	1.07852	1.10227	1.20518	0.996
	0.822963	1.01313	1.03808	1.25227	1.18538	1.46832	1.08593	1.10303	1.20815	0.998
	0.825185	1.015	1.04048	1.2635	1.18932	1.4779	1.09037	1.11515	1.21111	0.999
	0.828889	1.01937	1.04209	1.26912	1.18932	1.49811	1.09037	1.11515	1.21333	1.005
	0.828889	1.0275	1.04369	1.27393	1.19089	1.51301	1.09926	1.1188	1.21704	1.006
	0.83037	1.03563	1.0461	1.27553	1.24055	1.5162	1.10222	1.1218	1.21852	1.013
	0.831111	1.03812	1.0477	1.27634	1.24527	1.53748	1.10222	1.12424	1.22	1.016
	0.833333	1.04563	1.0485	1.29158	1.25867	1.54599	1.10519	1.12632	1.22518	1.019
	0.833333	1.04563	1.05332	1.29158	1.26655	1.54812	1.10963	1.12727	1.22963	1.023
	0.836296	1.06	1.05893	1.29238	1.27286	1.56727	1.11259	1.12932	1.23259	1.023
	0.836296	1.06875	1.06375	1.29719	1.2902	1.5694	1.11926	1.13609	1.23259	1.026
	0.842222	1.08125	1.06375	1.31163	1.29572	1.57259	1.12	1.13684	1.23481	1.035
	0.844444	1.08312	1.06856	1.31966	1.30123	1.58642	1.12148	1.13835	1.23704	1.038
	0.844444	1.08937	1.06856	1.32206	1.30517	1.60132	1.12889	1.14586	1.23778	1.042
	0.847407	1.10125	1.06856	1.32607	1.31463	1.60558	1.13259	1.15413	1.24	1.049
	0.851852	1.1075	1.06936	1.32607	1.32409	1.60558	1.13481	1.1594	1.24444	1.051
	0.854815	1.11187	1.06936	1.3349	1.32724	1.60558	1.13704	1.16097	1.24667	1.058
	0.857037	1.12187	1.07418	1.3349	1.33434	1.6758	1.14222	1.16325	1.25037	1.062
	0.857037	1.125	1.07498	1.3373	1.34064	1.6758	1.14963	1.16842	1.25185	1.062
	0.862963	1.125	1.0822	1.33971	1.34222	1.68644	1.15111	1.16917	1.25704	1.065
	0.864444	1.12688	1.0822	1.35094	1.35089	1.69176	1.15185	1.17444	1.26148	1.071
	0.866667	1.13062	1.08541	1.35415	1.36034	1.69602	1.15481	1.17576	1.28815	1.075
	0.866667	1.14875	1.08701	1.35816	1.36823	1.7024	1.15704	1.18106	1.28815	1.076
	0.871852	1.16	1.10065	1.36137	1.36823	1.70666	1.16889	1.19098	1.29926	1.076
	0.872593	1.1625	1.10065	1.36458	1.36901	1.71836	1.17333	1.19323	1.3037	1.084
	0.874815	1.16375	1.10947	1.36939	1.37138	1.72474	1.17407	1.19323	1.31111	1.089
	0.877778	1.16625	1.11108	1.37501	1.37374	1.72687	1.17556	1.19399	1.31778	1.094
	0.88	1.1675	1.11429	1.38062	1.3966	1.72794	1.17556	1.19545	1.32593	1.094
	0.884444	1.1825	1.1199	1.38062	1.40842	1.75028	1.1763	1.19549	1.32741	1.095
	0.885185	1.18437	1.1199	1.4071	1.42024	1.76411	1.17778	1.20076	1.32963	1.101
	0.896296	1.18437	1.12151	1.4087	1.42103	1.78007	1.18148	1.20985	1.33852	1.102
	0.897037	1.19687	1.12231	1.42475	1.42261	1.80454	1.18296	1.21053	1.34074	1.108
	0.899259	1.20125	1.12231	1.42555	1.42418	1.81838	1.18667	1.21109	1.34296	1.117
	0.9	1.20125	1.13113	1.42956	1.42576	1.8769	1.19259	1.2164	1.36	1.119
	0.902222	1.20375	1.13113	1.43036	1.42891	1.90456	1.19852	1.21654	1.36148	1.121
	0.904444	1.2075	1.13274	1.43197	1.43049	1.90669	1.2	1.22406	1.37185	1.122
	0.904444	1.21375	1.13354	1.43518	1.43443	2.04501	1.2037	1.23007	1.37407	1.125
	0.905926	1.21562	1.13354	1.44801	1.43837	2.04714	1.20593	1.23106	1.37926	1.137
	0.906667	1.21938	1.13354	1.44881	1.44389	2.11204	1.21037	1.23788	1.38	1.14
	0.90963	1.22188	1.13354	1.45764	1.45729	2.1546	1.21259	1.24298	1.3837	1.142
	0.915556	1.23438	1.13835	1.46165	1.46517	2.23546	1.21704	1.24753	1.38593	1.144
	0.916296	1.24188	1.14557	1.46406	1.46596		1.22296	1.25361	1.38889	1.145
	0.920741	1.24625	1.15119	1.46807	1.47857		1.22667	1.25413	1.38963	1.147
	0.922963	1.24812	1.15199	1.48251	1.48251		1.22963	1.25639	1.39407	1.151
	0.923704	1.25625	1.1536	1.48251	1.48802		1.23185	1.2574	1.39481	1.152
	0.926667	1.26063	1.1544	1.48411	1.48881		1.23556	1.25758	1.40148	1.152
	0.934074	1.26375	1.1544	1.48411	1.48881		1.23778	1.26272	1.40148	1.155
	0.940741	1.26375	1.1568	1.48652	1.49196		1.23926	1.27031	1.40593	1.158
	0.942963	1.265	1.15761	1.48652	1.50615		1.24148	1.27259	1.41185	1.164
	0.943704	1.2675	1.16242	1.49053	1.50694		1.25407	1.27744	1.41407	1.168
	0.945926	1.27375	1.16242	1.49855	1.51167		1.25852	1.2855	1.41556	1.171
	0.947407	1.28375	1.16483	1.51219	1.5164		1.26222	1.28797	1.42667	1.181
	0.947407	1.29625	1.16483	1.52342	1.5164		1.26889	1.29091	1.44593	1.193
	0.95037	1.3	1.16563	1.53545	1.51719		1.28074	1.3015	1.44963	1.195
	0.954815	1.3025	1.16964	1.53946	1.52428		1.28222	1.3015	1.44963	1.197
	0.956296	1.335	1.16964	1.54187	1.52428		1.28222	1.30376	1.45556	1.2
	0.958519	1.34375	1.17044	1.56273	1.52585		1.2837	1.30827	1.45704	1.2
	0.962222	1.37688	1.17526	1.56754	1.53216		1.28444	1.31283	1.46	1.207
	0.97037	1.37875	1.17606	1.58198	1.53216		1.28593	1.31288	1.46518	1.208
	0.972593	1.40813	1.18007	1.58359	1.53531		1.28889	1.31815	1.47259	1.22
	0.979259	1.41125	1.18087	1.5868	1.53846		1.29037	1.3197	1.47556	1.224
	0.980741	1.42	1.18408	1.59402	1.54635		1.29185	1.32256	1.49704	1.228
	0.982963	1.42687	1.18568	1.59482	1.54871		1.30296	1.32422	1.51333	1.231
	0.984444	1.45188	1.1905	1.59482	1.55029		1.30519	1.33561	1.5363	1.237
	0.98963	1.46188	1.1913	1.60043	1.55344		1.30593	1.33609	1.55037	1.24
	0.991852	1.46188	1.1921	1.60765	1.56999		1.31333	1.33759	1.55852	1.248
	0.997778	1.4725	1.1921	1.61086	1.57945		1.31333	1.33789	1.56074	1.248
	0.997778	1.49	1.19371	1.61568	1.59364		1.3163	1.34318	1.57037	1.25
	1.0037	1.50875	1.19852	1.62931	1.60309		1.31778	1.34624	1.58296	1.253
	1.00518	1.56438	1.20012	1.63734	1.61019		1.32	1.35308	1.58741	1.261
	1.00518	1.61	1.20012	1.6606	1.61019		1.33259	1.3579	1.60444	1.276
	1.00667	1.62437	1.20494	1.66461	1.61176		1.33259	1.36288	1.60519	1.284
	1.00741	1.64125	1.20975	1.67504	1.63226		1.33778	1.36598	1.60741	1.29
	1.00889	1.65187	1.21216	1.67664	1.64723		1.34222	1.36617	1.62963	1.303
	1.01111	1.65312	1.22018	1.68306	1.65038		1.34593	1.37585	1.6437	1.303
	1.01926	1.6725	1.22098	1.6975	1.66536		1.35037	1.38045	1.66074	1.314
	1.02		1.22339	1.70312	1.66536		1.35926	1.38106	1.66148	1.314
	1.02148		1.22499	1.70954	1.6693		1.36	1.39015	1.6763	1.319
	1.02741		1.2266	1.70954	1.68191		1.36889	1.40152	1.69778	1.322
	1.03111		1.2282	1.73039	1.68348		1.37037	1.40319	1.72296	1.323
	1.03333		1.23141	1.74884	1.70949		1.38222	1.41686	1.74	1.323
	1.0363		1.23302	1.75366	1.71186		1.38667	1.41894	1.74667	1.324
	1.03852		1.23382	1.7697	1.71816		1.38741	1.42141	1.75185	1.329
	1.04148		1.23622	1.77692	1.72289		1.39481	1.4218	1.78148	1.33
	1.04296		1.23703	1.78254	1.72526		1.40074	1.42256	1.80889	1.333
	1.04667		1.23703	1.78815	1.73156		1.40148	1.42651	1.84444	1.333
	1.04815		1.23863	1.82907	1.74181		1.40148	1.43333	1.8637	1.343
	1.04815		1.23943	1.88362	1.75127		1.4037	1.43888	1.89556	1.344
	1.05333		1.24184	1.9125	1.75363		1.40963	1.44167	1.89704	1.347
	1.05407		1.24665	1.92373	1.75915		1.41111	1.44318	1.94296	1.349
	1.0563		1.24746	1.93255	1.76782		1.41111	1.44647	1.94963	1.36
	1.0563		1.24906	1.97347	1.79146		1.41778	1.44962	1.95037	1.365
	1.06889		1.24986	1.97427	1.79304		1.41852	1.45076	1.97037	1.365
	1.07111		1.24986	1.99593	1.81195		1.42074	1.45303	2	1.37
	1.07259		1.24986	2.01358	1.82456		1.42148	1.4533	2.22519	1.38
	1.07333		1.25066	2.03604	1.82929		1.42815	1.4571		1.383
	1.0763		1.25468	2.06251	1.84742		1.43037	1.46316		1.383
	1.07852		1.25468	2.1644	1.88289		1.43333	1.46591		1.39
	1.08222		1.25468		1.88919		1.44148	1.46621		1.392
	1.08296		1.26109		1.90023		1.44963	1.47143		1.396
	1.08519		1.26109		1.91126		1.45259	1.48496		1.399
	1.08519		1.26109		1.92702		1.45704	1.48561		1.403
	1.08741		1.26591		1.93096		1.46296	1.49015		1.408
	1.08741		1.26751		1.9349		1.47556	1.50677		1.409
	1.08741		1.26831		1.93727		1.48444	1.51253		1.413
	1.09259		1.27714		1.99086		1.48963	1.51278		1.413
	1.09482		1.27954		2.01766		1.49037	1.5203		1.419
	1.09778		1.28195		2.03815		1.49037	1.52348		1.425
	1.10074		1.28436		2.09884		1.49407	1.52406		1.432
	1.10222		1.28516		2.15086		1.49778	1.52424		1.436
	1.10519		1.28917		2.16031		1.50148	1.53151		1.436
	1.10963		1.28917		2.20603		1.51704	1.54211		1.436
	1.11037		1.28997		2.21312		1.51926	1.55151		1.438
	1.11185		1.29158				1.52963	1.55263		1.439
	1.11185		1.29158				1.54593	1.58106		1.439
	1.11259		1.29158				1.5563	1.59248		1.443
	1.11556		1.29158				1.56741	1.59529		1.458
	1.11778		1.29559				1.56889	1.6015		1.465
	1.11778		1.29559				1.57482	1.60303		1.468
	1.12148		1.29719				1.57704	1.61288		1.469
	1.12222		1.29719				1.57778	1.61427		1.472
	1.12667		1.2996				1.58815	1.62576		1.473
	1.12889		1.30201				1.58963	1.62794		1.476
	1.12963		1.30281				1.59926	1.63864		1.478
	1.13259		1.30762				1.60222	1.63933		1.481
	1.13407		1.31163				1.60296	1.63939		1.486
	1.13481		1.31324				1.60296	1.64313		1.494
	1.14444		1.31404				1.60444	1.64465		1.504
	1.14667		1.31645				1.60667	1.64692		1.505
	1.14889		1.31805				1.61407	1.64962		1.505
	1.1563		1.31885				1.61407	1.65076		1.506
	1.15926		1.32206				1.61778	1.65452		1.506
	1.15926		1.32367				1.62222	1.65454		1.508
	1.16593		1.3365				1.62519	1.6594		1.511
	1.16667		1.3373				1.63407	1.66287		1.515
	1.16667		1.3373				1.63481	1.67502		1.525
	1.17185		1.33971				1.63852	1.67576		1.535
	1.17333		1.34292				1.63926	1.68033		1.535
	1.1763		1.34292				1.6637	1.68872		1.541
	1.1763		1.34292				1.66444	1.69925		1.552
	1.17852		1.34452				1.67407	1.70615		1.562
	1.17852		1.34533				1.68889	1.71429		1.567
	1.1837		1.34533				1.70444	1.73008		1.567
	1.18593		1.34533				1.72444	1.76765		1.572
	1.18815		1.34773				1.7437	1.78496		1.574
	1.18815		1.34773				1.74889	1.7874		1.575
	1.19111		1.34773				1.75852	1.79271		1.575
	1.19259		1.34854				1.7763	1.80301		1.577
	1.19259		1.34854				1.79185	1.83675		1.584
	1.19852		1.35014				1.80815	1.84924		1.592
	1.20222		1.35576				1.88	1.92711		1.595
	1.20296		1.35576				1.88444	1.92727		1.602
	1.2037		1.35656				1.89556	1.94305		1.605
	1.2037		1.36618				1.90667	1.95227		1.607
	1.20518		1.36618				1.90889	1.95444		1.611
	1.21111		1.36699				1.93111	1.975		1.624
	1.21556		1.36859				1.98518	2.03493		1.625
	1.21556		1.36859				2.00667	2.03684		1.625
	1.21704		1.36939							1.633
	1.21778		1.371							1.644
	1.22		1.3718							1.647
	1.22296		1.37421							1.65
	1.23185		1.37421							1.66
	1.24		1.37501							1.661
	1.24518		1.37742							1.663
	1.24667		1.37902							1.667
	1.24667		1.37982							1.667
	1.24667		1.38062							1.668
	1.24741		1.38062							1.67
	1.24963		1.38062							1.677
	1.24963		1.38062							1.691
	1.25037		1.38464							1.694
	1.25037		1.38464							1.694
	1.25037		1.38544							1.697
	1.25407		1.38865							1.699
	1.2563		1.39025							1.706
	1.25852		1.39266							1.716
	1.2637		1.39587							1.733
	1.2637		1.39747							1.736
	1.26667		1.39827							1.736
	1.2837		1.39827							1.746
	1.30519		1.39908							1.762
	1.30889		1.39908							1.764
	1.31259		1.40309							1.776
	1.31556		1.40389							1.782
	1.3163		1.40549							1.782
	1.31778		1.40549							1.783
	1.32296		1.4063							1.786
	1.32963		1.4071							1.786
	1.33333		1.4087							1.787
	1.34444		1.4087							1.792
	1.34519		1.4087							1.799
	1.35185		1.4095							1.81
	1.35407		1.41191							1.816
	1.35482		1.41352							1.848
	1.35482		1.41512							1.869
	1.35556		1.41913							1.889
	1.35778		1.41993							1.906
	1.36148		1.42154							1.914
	1.36148		1.42956							1.925
	1.36667		1.43036							1.939
	1.36889		1.43197							1.969
	1.37778		1.43357							2
	1.38444		1.43518							2.007
	1.38593		1.43838							2.02
	1.38963		1.44159							2.048
	1.40074		1.44159							2.065
	1.4163		1.444							2.086
	1.42815		1.44641							2.107
	1.42815		1.44801							2.117
	1.43778		1.44881							2.209
	1.44296		1.44962
	1.45704		1.44962
	1.47185		1.45363
	1.47259		1.45603
	1.50148		1.45924
	1.50889		1.46165
	1.51111		1.46486
	1.52444		1.46646
	1.52593		1.46726
	1.52889		1.46726
	1.5563		1.46807
	1.56		1.46967
	1.56296		1.47047
	1.5637		1.47047
	1.6		1.47208
	1.60519		1.47208
	1.60963		1.47529
	1.60963		1.4801
	1.61704		1.4809
	1.64889		1.48251
	1.65926		1.48652
	1.66074		1.49133
	1.66444		1.49133
	1.66889		1.49374
	1.67259		1.49855
	1.71259		1.49855
	1.75185		1.49855
	1.76963		1.49935
	1.77704		1.50096
	1.78296		1.50176
	1.82519		1.50497
			1.50898
			1.51058
			1.5154
			1.52583
			1.52904
			1.53064
			1.53064
			1.53144
			1.53706
			1.54187
			1.54348
			1.54428
			1.54428
			1.54989
			1.54989
			1.54989
			1.5515
			1.55471
			1.55471
			1.55952
			1.56273
			1.57155
			1.57316
			1.57797
			1.57958
			1.57958
			1.58118
			1.58359
			1.58359
			1.59161
			1.59402
			1.59402
			1.59482
			1.59482
			1.59482
			1.59803
			1.60043
			1.60444
			1.60765
			1.61247
			1.61648
			1.62049
			1.62049
			1.62129
			1.62209
			1.6237
			1.6237
			1.62851
			1.62931
			1.63172
			1.63413
			1.63413
			1.63493
			1.63653
			1.63894
			1.63974
			1.63974
			1.64696
			1.64696
			1.64857
			1.65017
			1.65579
			1.65579
			1.65819
			1.659
			1.66301
			1.66862
			1.67183
			1.67344
			1.67424
			1.67664
			1.67664
			1.67985
			1.68948
			1.69028
			1.69269
			1.6951
			1.70151
			1.70312
			1.70793
			1.71435
			1.71676
			1.71996
			1.72157
			1.72237
			1.72398
			1.72959
			1.732
			1.732
			1.74082
			1.74243
			1.74323
			1.75045
			1.75687
			1.75847
			1.75927
			1.76168
			1.76649
			1.7681
			1.7681
			1.7697
			1.77291
			1.77532
			1.77853
			1.77853
			1.78093
			1.79698
			1.79858
			1.80741
			1.80901
			1.80981
			1.81463
			1.82586
			1.82826
			1.83147
			1.8411
			1.84351
			1.84431
			1.85233
			1.85394
			1.85714
			1.87158
			1.8764
			1.89726
			1.90608
			1.94459
			1.94539
			1.9478
			1.9494
			1.9502
			1.98229
			1.99192
			2.00876
			2.01197
			2.01919
			2.02
			2.04326
			2.05289
			2.07535
			2.08337
			2.12268
			2.13872
			2.14354
			2.16279
			2.1676
			2.18445
			2.31682
