# Supplementary material for: Local chromatin fiber folding represses transcription and loop extrusion in quiescent cells
Source: eLife. 2021 Nov 4;10:e72062. doi: 10.7554/eLife.72062 (PMC8598167; doi:10.7554/eLife.72062)
Supplement: Figure 4—source data 1. [file elife-72062-fig4-data1.xlsx]

## Sheet: DAPI volume
DAPI volume measurements
Strain:	7177	7206	7175	7208	7205	7210	7202	7209	7200	7207	7200 G1	7207 G1	7175 G1	7208 G1	7177 G1	7206 G1
	0.417	0.417	0.503	0.528	0.46	0.531	0.462	0.513	0.529	0.53997	0.45442	0.52222	0.52778	0.50208		0.395238
	0.417	0.421	0.557	0.534	0.46	0.538	0.507	0.519	0.57	0.6	0.46667	0.54028	0.54306	0.51597	0.463265	0.42585
	0.427	0.424	0.583	0.563	0.471	0.541	0.521	0.525	0.587	0.60737	0.53401	0.55486	0.56319	0.52708	0.485714	0.427211
	0.429	0.433	0.602	0.572	0.476	0.543	0.522	0.549	0.587	0.63394	0.54422	0.55764	0.58889	0.53819	0.489116	0.430612
	0.431	0.433	0.63	0.589	0.481	0.544	0.526	0.55	0.594	0.6464	0.58435	0.56319	0.59097	0.55278	0.495238	0.432653
	0.432	0.437	0.637	0.591	0.485	0.551	0.535	0.558	0.594	0.656	0.59388	0.56458	0.60139	0.55486	0.495918	0.434694
	0.436	0.45	0.652	0.603	0.501	0.553	0.535	0.571	0.602	0.656	0.61224	0.61319	0.6125	0.55486	0.497959	0.457823
	0.437	0.45	0.66	0.609	0.52	0.554	0.552	0.588	0.603	0.65732	0.61769	0.61667	0.66111	0.56111	0.49932	0.497959
	0.441	0.451	0.671	0.62	0.524	0.56	0.553	0.589	0.603	0.65859	0.64354	0.625	0.67014	0.56319	0.508844	0.50068
	0.451	0.452	0.674	0.637	0.524	0.561	0.56	0.59	0.615	0.66198	0.6483	0.62708	0.675	0.56736	0.546939	0.502721
	0.454	0.457	0.682	0.65	0.535	0.569	0.568	0.591	0.615	0.66494	0.65306	0.63333	0.67708	0.57014	0.558503	0.503401
	0.456	0.458	0.685	0.666	0.536	0.572	0.574	0.592	0.632	0.67379	0.66735	0.63611	0.69861	0.57708	0.559184	0.513605
	0.458	0.469	0.686	0.667	0.538	0.575	0.575	0.592	0.633	0.68015	0.67007	0.6375	0.70278	0.57986	0.565986	0.539456
	0.463	0.471	0.691	0.671	0.557	0.575	0.577	0.593	0.641	0.68707	0.69048	0.63958	0.70278	0.62708	0.566667	0.541497
	0.471	0.473	0.692	0.675	0.56	0.575	0.579	0.601	0.641	0.69069	0.70136	0.64097	0.72361	0.62708	0.602721	0.551701
	0.472	0.477	0.696	0.676	0.566	0.577	0.582	0.609	0.642	0.69673	0.70408	0.64306	0.725	0.63472	0.604082	0.560544
	0.475	0.479	0.698	0.681	0.579	0.583	0.582	0.611	0.645	0.70518	0.70816	0.64792	0.72778	0.63889	0.604082	0.562585
	0.477	0.483	0.7	0.687	0.58	0.585	0.583	0.615	0.648	0.709	0.70816	0.67153	0.73681	0.64097	0.612925	0.571429
	0.482	0.486	0.706	0.688	0.582	0.596	0.584	0.623	0.65	0.709	0.73061	0.67639	0.7375	0.64306	0.62517	0.573469
	0.485	0.486	0.708	0.689	0.583	0.599	0.588	0.624	0.65	0.709	0.73265	0.67917	0.74167	0.65417	0.634694	0.57415
	0.487	0.492	0.713	0.69	0.602	0.601	0.591	0.624	0.654	0.71726	0.73537	0.68194	0.75069	0.65556	0.634694	0.57415
	0.488	0.497	0.717	0.691	0.602	0.611	0.593	0.625	0.657	0.71726	0.74218	0.68889	0.76111	0.65903	0.637415	0.592517
	0.489	0.5	0.722	0.709	0.607	0.613	0.597	0.628	0.657	0.71823	0.75238	0.70347	0.76806	0.66319	0.637415	0.6
	0.493	0.501	0.726	0.712	0.611	0.615	0.605	0.63	0.667	0.71823	0.75918	0.71528	0.77083	0.66944	0.639456	0.610884
	0.493	0.501	0.727	0.713	0.614	0.619	0.606	0.63	0.675	0.72299	0.75986	0.72153	0.77917	0.67222	0.648299	0.614286
	0.497	0.504	0.728	0.713	0.615	0.62	0.607	0.63	0.675	0.724	0.76054	0.725	0.79167	0.67292	0.652381	0.618367
	0.498	0.509	0.729	0.718	0.615	0.621	0.609	0.632	0.69	0.7245	0.76599	0.725	0.79931	0.67569	0.658503	0.621769
	0.5	0.51	0.73	0.723	0.615	0.621	0.615	0.634	0.69	0.72692	0.77007	0.74028	0.80694	0.67639	0.662585	0.630612
	0.502	0.51	0.73	0.73	0.616	0.623	0.618	0.636	0.696	0.72838	0.77687	0.74167	0.80833	0.67917	0.67619	0.653061
	0.505	0.512	0.734	0.733	0.631	0.624	0.621	0.641	0.696	0.73092	0.7898	0.74653	0.81042	0.68403	0.676871	0.654422
	0.506	0.512	0.739	0.733	0.635	0.626	0.622	0.642	0.698	0.73473	0.79524	0.74792	0.81181	0.68403	0.684354	0.666667
	0.512	0.513	0.741	0.735	0.635	0.629	0.623	0.643	0.701	0.73778	0.79932	0.75	0.82431	0.69236	0.689116	0.67415
	0.512	0.513	0.743	0.74	0.635	0.631	0.625	0.644	0.704	0.7402	0.80748	0.75139	0.825	0.69444	0.690476	0.691837
	0.512	0.514	0.747	0.741	0.639	0.633	0.625	0.646	0.705	0.74234	0.81293	0.75278	0.82708	0.69444	0.690476	0.702721
	0.512	0.515	0.748	0.742	0.64	0.635	0.627	0.647	0.705	0.74615	0.81701	0.76389	0.82778	0.69514	0.697279	0.721769
	0.515	0.52	0.748	0.747	0.64	0.637	0.628	0.648	0.716	0.74865	0.81905	0.76875	0.83056	0.69861	0.702041	0.722449
	0.515	0.527	0.754	0.747	0.64	0.637	0.63	0.649	0.722	0.749	0.82653	0.76944	0.83681	0.70139	0.702721	0.746939
	0.518	0.531	0.755	0.755	0.641	0.64	0.634	0.656	0.723	0.75122	0.82721	0.77361	0.83889	0.70625	0.709524	0.755102
	0.519	0.538	0.759	0.756	0.642	0.641	0.637	0.656	0.723	0.75154	0.83537	0.77639	0.84722	0.71389	0.714966	0.755782
	0.52	0.543	0.759	0.757	0.644	0.641	0.64	0.657	0.724	0.75503	0.84218	0.7875	0.85139	0.71736	0.717687	0.757143
	0.521	0.55	0.764	0.758	0.65	0.641	0.641	0.657	0.724	0.75673	0.84694	0.79028	0.85903	0.72014	0.722449	0.765986
	0.521	0.551	0.766	0.759	0.65	0.646	0.647	0.659	0.731	0.758	0.85306	0.79722	0.85972	0.72222	0.723129	0.776871
	0.524	0.553	0.766	0.759	0.651	0.646	0.655	0.662	0.731	0.758	0.86599	0.79792	0.86042	0.72361	0.734694	0.801361
	0.535	0.555	0.769	0.761	0.653	0.65	0.658	0.662	0.732	0.76193	0.86735	0.79861	0.88403	0.72778	0.734694	0.804762
	0.539	0.558	0.77	0.761	0.654	0.65	0.659	0.662	0.733	0.76193	0.91156	0.80208	0.89375	0.73194	0.734694	0.812245
	0.541	0.559	0.772	0.762	0.658	0.65	0.659	0.663	0.735	0.76391	0.91497	0.80347	0.90347	0.73264	0.744218	0.834014
	0.542	0.562	0.774	0.765	0.658	0.65	0.659	0.663	0.735	0.768	0.91633	0.8125	0.90972	0.73472	0.747619	0.840816
	0.542	0.563	0.776	0.769	0.658	0.654	0.661	0.663	0.738	0.76899	0.91701	0.8125	0.92083	0.73611	0.754422	0.85034
	0.543	0.567	0.776	0.772	0.67	0.656	0.662	0.666	0.738	0.774	0.92313	0.8125	0.92292	0.73681	0.754422	0.853061
	0.543	0.567	0.777	0.773	0.67	0.658	0.662	0.668	0.738	0.774	0.92653	0.81458	0.94167	0.73681	0.757143	0.861905
	0.549	0.57	0.779	0.778	0.671	0.662	0.666	0.67	0.739	0.77533	0.92925	0.81458	0.95208	0.74097	0.758503	0.864626
	0.551	0.57	0.779	0.783	0.673	0.662	0.67	0.673	0.742	0.7762	0.93401	0.81597	0.95556	0.74167	0.761905	0.880272
	0.553	0.571	0.786	0.785	0.678	0.664	0.673	0.673	0.744	0.7788	0.93605	0.82083	0.96528	0.74583	0.771429	0.893878
	0.555	0.577	0.787	0.792	0.679	0.665	0.673	0.673	0.745	0.77914	0.93673	0.82847	0.96875	0.74722	0.782313	0.897959
	0.555	0.582	0.787	0.794	0.687	0.669	0.676	0.676	0.745	0.78005	0.93946	0.83125	0.97292	0.74931	0.782993	0.90068
	0.558	0.583	0.787	0.796	0.694	0.669	0.679	0.678	0.749	0.78125	0.93946	0.83403	0.97639	0.75417	0.787075	0.902721
	0.558	0.583	0.789	0.801	0.695	0.67	0.68	0.679	0.75	0.78488	0.95034	0.83542	0.98819	0.75556	0.796599	0.912245
	0.559	0.59	0.79	0.803	0.697	0.67	0.681	0.683	0.751	0.78529	0.95374	0.8375	0.99514	0.76181	0.808844	0.914966
	0.559	0.592	0.794	0.805	0.703	0.67	0.681	0.683	0.751	0.78529	0.95986	0.85278	1.00556	0.76597	0.814966	0.917007
	0.56	0.592	0.796	0.809	0.704	0.672	0.681	0.684	0.753	0.78729	0.96803	0.86389	1.01042	0.76875	0.814966	0.927891
	0.562	0.593	0.797	0.809	0.704	0.673	0.682	0.686	0.755	0.78729	0.97279	0.86458	1.01528	0.77083	0.815646	0.931973
	0.565	0.595	0.797	0.812	0.707	0.675	0.683	0.687	0.755	0.7885	0.97823	0.87222	1.02847	0.77153	0.817007	0.937415
	0.566	0.6	0.797	0.814	0.707	0.675	0.683	0.689	0.757	0.79333	1.0034	0.87292	1.04444	0.77292	0.819048	0.938776
	0.567	0.602	0.798	0.815	0.708	0.676	0.684	0.689	0.759	0.794	1.01973	0.87431	1.06389	0.77708	0.823129	0.940816
	0.57	0.602	0.798	0.815	0.709	0.676	0.684	0.689	0.762	0.79438	1.02381	0.87569	1.06389	0.77778	0.82449	0.977551
	0.571	0.608	0.799	0.816	0.711	0.678	0.685	0.691	0.764	0.79454	1.02449	0.87986	1.07014	0.78542	0.82585	0.978912
	0.571	0.613	0.8	0.818	0.712	0.679	0.685	0.692	0.764	0.79691	1.03537	0.88819	1.08194	0.78611	0.829932	0.995238
	0.572	0.614	0.805	0.819	0.712	0.68	0.692	0.692	0.765	0.79937	1.03673	0.90486	1.08472	0.78889	0.834694	1.00408
	0.572	0.617	0.805	0.819	0.712	0.68	0.692	0.692	0.765	0.8	1.05918	0.90764	1.10278	0.79236	0.840136	1.0068
	0.573	0.62	0.808	0.819	0.713	0.68	0.695	0.695	0.767	0.8	1.06122	0.90903	1.11528	0.79375	0.841497	1.01633
	0.573	0.621	0.809	0.82	0.714	0.687	0.697	0.695	0.767	0.80087	1.06395	0.91667	1.12222	0.79792	0.843537	1.02653
	0.574	0.624	0.814	0.822	0.714	0.689	0.698	0.696	0.771	0.80087	1.07755	0.91667	1.12292	0.80556	0.85102	1.04354
	0.574	0.627	0.817	0.825	0.714	0.691	0.7	0.697	0.771	0.802	1.08367	0.91736	1.15764	0.80764	0.854422	1.05034
	0.574	0.631	0.819	0.825	0.715	0.692	0.7	0.699	0.771	0.803	1.08639	0.92153	1.16389	0.80833	0.856463	1.0585
	0.576	0.632	0.82	0.827	0.717	0.692	0.704	0.699	0.771	0.80325	1.09932	0.92708	1.175	0.81111	0.864626	1.05918
	0.577	0.632	0.821	0.827	0.717	0.694	0.705	0.699	0.771	0.80452	1.10544	0.92917	1.17569	0.81875	0.865306	1.09456
	0.577	0.64	0.821	0.828	0.721	0.695	0.706	0.701	0.773	0.80476	1.10952	0.93403	1.22083	0.82569	0.865986	1.1
	0.578	0.642	0.823	0.831	0.724	0.696	0.707	0.701	0.773	0.80579	1.11429	0.93542	1.23264	0.83056	0.867347	1.11088
	0.579	0.643	0.825	0.832	0.728	0.697	0.708	0.702	0.773	0.80606	1.11497	0.97083	1.24306	0.83889	0.873469	1.12109
	0.58	0.647	0.83	0.832	0.73	0.698	0.709	0.702	0.777	0.80736	1.11497	0.97917	1.25972	0.83889	0.886395	1.13197
	0.582	0.651	0.831	0.833	0.731	0.698	0.709	0.703	0.777	0.80736	1.13673	0.98056	1.27431	0.84514	0.911565	1.16735
	0.582	0.651	0.831	0.833	0.732	0.701	0.709	0.703	0.778	0.8096	1.13673	0.98125	1.29583	0.84514	0.914286	1.17483
	0.583	0.652	0.831	0.834	0.732	0.705	0.711	0.704	0.779	0.80995	1.15986	0.99306	1.30069	0.85278	0.914966	1.17551
	0.586	0.652	0.832	0.835	0.732	0.707	0.712	0.704	0.779	0.81	1.1619	0.99444	1.30417	0.86875	0.929252	1.19116
	0.586	0.653	0.833	0.838	0.735	0.708	0.712	0.707	0.781	0.81087	1.16259	0.99653	1.325	0.88264	0.934694	1.19728
	0.587	0.654	0.834	0.838	0.738	0.708	0.715	0.708	0.782	0.81514	1.16735	1.00278	1.34861	0.88889	0.936054	1.21497
	0.589	0.66	0.835	0.842	0.742	0.708	0.715	0.708	0.782	0.81514	1.17075	1.00347	1.36389	0.89097	0.937415	1.22993
	0.589	0.662	0.835	0.842	0.746	0.709	0.718	0.708	0.786	0.81869	1.17211	1.00625	1.37222	0.89097	0.938095	1.23605
	0.59	0.663	0.836	0.842	0.746	0.709	0.719	0.71	0.786	0.81904	1.18435	1.01181	1.37986	0.89583	0.942177	1.23673
	0.592	0.664	0.837	0.843	0.747	0.711	0.719	0.711	0.79	0.82102	1.19184	1.01389	1.40139	0.89722	0.945578	1.23673
	0.593	0.665	0.837	0.846	0.747	0.711	0.725	0.711	0.793	0.8211	1.19524	1.01875	1.4375	0.89792	0.945578	1.24422
	0.593	0.667	0.838	0.85	0.749	0.712	0.726	0.711	0.793	0.824	1.19796	1.02431	1.52569	0.90139	0.948299	1.24558
	0.594	0.668	0.838	0.853	0.749	0.712	0.727	0.711	0.793	0.824	1.20544	1.02431	1.57014	0.90278	0.951701	1.24626
	0.594	0.669	0.839	0.854	0.749	0.713	0.728	0.712	0.794	0.82423	1.21088	1.04375	1.57292	0.91528	0.952381	1.26599
	0.595	0.669	0.839	0.856	0.75	0.713	0.729	0.713	0.797	0.82593	1.21905	1.04583	1.57847	0.91667	0.953742	1.2898
	0.595	0.674	0.841	0.859	0.75	0.714	0.729	0.713	0.798	0.82812	1.22109	1.06667	1.61597	0.91736	0.959184	1.29048
	0.596	0.674	0.841	0.859	0.752	0.714	0.73	0.719	0.799	0.82863	1.26667	1.07639	1.62292	0.925	0.959184	1.30952
	0.598	0.679	0.843	0.86	0.752	0.714	0.73	0.721	0.799	0.82955	1.27347	1.07778	1.70347	0.94444	0.961905	1.31497
	0.598	0.68	0.844	0.861	0.752	0.714	0.731	0.722	0.8	0.8299	1.27687	1.08403	1.71181	0.94653	0.964626	1.32313
	0.598	0.681	0.845	0.863	0.753	0.714	0.733	0.723	0.802	0.83117	1.28707	1.10347	1.71667	0.95972	0.993197	1.33537
	0.598	0.684	0.847	0.863	0.754	0.715	0.734	0.724	0.809	0.83202	1.29592	1.12014	1.72361	0.97083	0.997279	1.34082
	0.599	0.684	0.85	0.865	0.756	0.716	0.736	0.725	0.809	0.833	1.30272	1.13472	1.75833	0.97986	1	1.36667
	0.599	0.685	0.851	0.865	0.756	0.716	0.738	0.725	0.813	0.83371	1.33537	1.13542	1.76458	0.98958	1.00136	1.38776
	0.601	0.686	0.855	0.866	0.757	0.716	0.738	0.725	0.813	0.83371	1.35102	1.14444	1.76944	0.99306	1.01361	1.39116
	0.601	0.686	0.86	0.87	0.758	0.716	0.738	0.728	0.814	0.83438	1.36259	1.15694	1.82083	1.00694	1.01497	1.39184
	0.603	0.687	0.86	0.87	0.76	0.717	0.739	0.728	0.815	0.83461	1.36939	1.2	1.84861	1.01458	1.02381	1.41905
	0.606	0.691	0.863	0.871	0.76	0.718	0.742	0.728	0.815	0.83461	1.38231	1.20556	1.85417	1.04236	1.02517	1.42381
	0.606	0.691	0.863	0.874	0.761	0.722	0.744	0.729	0.817	0.83498	1.38912	1.21458	1.88403	1.04653	1.02653	1.42517
	0.607	0.694	0.865	0.874	0.761	0.724	0.744	0.729	0.817	0.83498	1.42041	1.26667	1.94722	1.04931	1.03946	1.42585
	0.609	0.695	0.866	0.876	0.762	0.725	0.744	0.729	0.818	0.83559	1.42925	1.27431	1.96528	1.05694	1.04218	1.43401
	0.61	0.696	0.867	0.876	0.763	0.726	0.744	0.729	0.818	0.8368	1.42993	1.28611		1.06458	1.0449	1.44082
	0.611	0.697	0.868	0.88	0.763	0.728	0.745	0.73	0.818	0.83851	1.44966	1.3375		1.06736	1.04558	1.45782
	0.612	0.698	0.871	0.88	0.764	0.728	0.745	0.73	0.825	0.83851	1.4551	1.34236		1.075	1.04626	1.46667
	0.614	0.698	0.872	0.88	0.765	0.73	0.745	0.73	0.825	0.84042	1.46463	1.35764		1.09167	1.06463	1.49048
	0.615	0.7	0.876	0.881	0.767	0.731	0.746	0.731	0.827	0.841	1.47279	1.39583		1.11389	1.08503	1.49524
	0.615	0.702	0.878	0.884	0.768	0.732	0.746	0.731	0.827	0.841	1.48299	1.40764		1.11736	1.08707	1.51224
	0.617	0.705	0.878	0.884	0.769	0.732	0.747	0.733	0.828	0.8411	1.49048	1.42917		1.14583	1.11088	1.51497
	0.618	0.706	0.879	0.885	0.769	0.736	0.749	0.734	0.828	0.84132	1.49592	1.43958		1.22569	1.12993	1.52653
	0.619	0.707	0.879	0.885	0.77	0.737	0.75	0.734	0.829	0.84163	1.50136	1.44653		1.24792	1.13946	1.53605
	0.621	0.709	0.879	0.886	0.77	0.737	0.753	0.734	0.83	0.8437	1.59388	1.44722		1.26181	1.14286	1.56327
	0.621	0.709	0.882	0.886	0.77	0.737	0.753	0.734	0.831	0.84386	1.59592	1.47986		1.26736	1.14422	1.56871
	0.623	0.713	0.884	0.886	0.771	0.737	0.754	0.735	0.832	0.8464	1.60068	1.48125		1.27153	1.15034	1.58367
	0.624	0.716	0.885	0.887	0.772	0.737	0.755	0.736	0.836	0.8464	1.61701	1.49653		1.30903	1.15986	1.58776
	0.624	0.716	0.888	0.887	0.772	0.737	0.759	0.738	0.836	0.8464	1.64082	1.49722		1.31319	1.18639	1.59932
	0.624	0.717	0.89	0.888	0.773	0.738	0.76	0.738	0.837	0.84767	1.6619	1.52292		1.33611	1.20136	1.61429
	0.624	0.73	0.89	0.888	0.776	0.738	0.761	0.739	0.838	0.84889	1.69116	1.54653		1.35208	1.2102	1.62381
	0.625	0.733	0.891	0.889	0.776	0.738	0.762	0.739	0.838	0.85129	1.73878	1.57014		1.38542	1.28367	1.68231
	0.625	0.734	0.895	0.889	0.777	0.739	0.764	0.74	0.84	0.85147	1.74626	1.57986		1.38958	1.29048	1.71837
	0.626	0.747	0.897	0.89	0.778	0.739	0.764	0.74	0.84	0.85149	1.7483	1.64028		1.41389	1.32313	1.75714
	0.626	0.749	0.897	0.89	0.779	0.739	0.765	0.742	0.843	0.8525	1.76259	1.6625		1.42083	1.32449	1.75782
	0.626	0.755	0.897	0.891	0.779	0.74	0.765	0.742	0.843	0.85528	1.78231	1.66597		1.43958	1.34218	1.75986
	0.626	0.757	0.899	0.891	0.779	0.74	0.766	0.742	0.844	0.85538	1.78776	1.69097		1.44097	1.37007	1.76054
	0.628	0.76	0.899	0.893	0.782	0.741	0.766	0.745	0.846	0.85655	1.80272	1.69097		1.44583	1.37687	1.76054
	0.629	0.76	0.901	0.894	0.783	0.741	0.766	0.745	0.846	0.85782	1.81224	1.69306		1.45208	1.37891	1.79184
	0.629	0.762	0.902	0.898	0.783	0.742	0.766	0.746	0.846	0.858		1.69514		1.47083	1.40476	1.79456
	0.63	0.764	0.902	0.898	0.784	0.742	0.767	0.746	0.846	0.85853		1.70903		1.47569	1.40748
	0.63	0.768	0.904	0.898	0.785	0.743	0.767	0.747	0.848	0.86095		1.72153		1.4875	1.40884
	0.631	0.769	0.904	0.899	0.786	0.743	0.767	0.748	0.848	0.86095		1.7375		1.49028	1.4102
	0.631	0.77	0.905	0.9	0.787	0.743	0.767	0.748	0.849	0.861		1.81389		1.49306	1.42721
	0.631	0.771	0.905	0.905	0.787	0.744	0.767	0.75	0.849	0.86317		1.82292		1.5	1.44286
	0.632	0.775	0.906	0.907	0.789	0.744	0.768	0.751	0.852	0.86336		1.83958		1.50208	1.4585
	0.633	0.776	0.906	0.912	0.791	0.746	0.769	0.751	0.857	0.86416		1.84236		1.50417	1.4585
	0.633	0.777	0.909	0.913	0.792	0.747	0.769	0.751	0.857	0.86577		1.93611		1.50417	1.46531
	0.633	0.777	0.912	0.913	0.794	0.747	0.769	0.753	0.857	0.86699		1.94028		1.51944	1.46667
	0.634	0.783	0.914	0.914	0.799	0.747	0.771	0.753	0.857	0.86706		1.94583		1.52639	1.47483
	0.634	0.786	0.915	0.915	0.8	0.747	0.771	0.754	0.859	0.86706		2.02986		1.53681	1.48027
	0.635	0.786	0.917	0.915	0.801	0.748	0.771	0.755	0.859	0.86819				1.53681	1.49728
	0.636	0.786	0.917	0.917	0.801	0.748	0.771	0.755	0.86	0.86819				1.53889	1.50612
	0.636	0.788	0.918	0.917	0.802	0.748	0.772	0.757	0.862	0.8694				1.54931	1.52245
	0.638	0.789	0.918	0.917	0.803	0.749	0.773	0.758	0.862	0.87051				1.56667	1.53469
	0.639	0.789	0.918	0.918	0.804	0.751	0.773	0.759	0.862	0.87182				1.57917	1.55918
	0.639	0.793	0.919	0.918	0.805	0.751	0.773	0.76	0.862	0.87302				1.58194	1.57007
	0.64	0.793	0.919	0.92	0.806	0.752	0.775	0.761	0.865	0.87485				1.60208	1.59864
	0.64	0.796	0.921	0.92	0.807	0.753	0.776	0.761	0.868	0.87615				1.62361	1.60408
	0.645	0.796	0.922	0.92	0.809	0.755	0.777	0.763	0.868	0.87665				1.63542	1.61905
	0.646	0.798	0.924	0.921	0.81	0.756	0.779	0.763	0.873	0.87685				1.63819	1.62789
	0.646	0.799	0.925	0.921	0.812	0.756	0.78	0.765	0.873	0.87812				1.64167	1.67823
	0.648	0.802	0.926	0.921	0.813	0.757	0.781	0.766	0.875	0.87875				1.68681	1.68639
	0.648	0.803	0.927	0.922	0.814	0.759	0.782	0.767	0.875	0.881				1.6875	1.72109
	0.648	0.803	0.929	0.923	0.814	0.759	0.782	0.767	0.875	0.881				1.70069	1.72177
	0.648	0.812	0.93	0.924	0.815	0.76	0.782	0.769	0.876	0.88148				1.70764	1.7449
	0.649	0.814	0.934	0.925	0.815	0.76	0.784	0.77	0.876	0.882				1.72014	1.75374
	0.651	0.817	0.934	0.926	0.817	0.76	0.785	0.77	0.877	0.88394				1.72639	1.75714
	0.652	0.82	0.934	0.926	0.817	0.76	0.785	0.771	0.879	0.8851				1.73403	1.76531
	0.654	0.823	0.935	0.929	0.818	0.762	0.786	0.771	0.879	0.88524				1.73472	1.76939
	0.656	0.828	0.936	0.929	0.819	0.762	0.786	0.773	0.879	0.887				1.73681	1.77891
	0.656	0.829	0.938	0.929	0.821	0.762	0.787	0.773	0.88	0.887				1.73889	1.78027
	0.656	0.831	0.938	0.93	0.821	0.762	0.788	0.774	0.88	0.889				1.75139	1.78367
	0.656	0.831	0.939	0.932	0.821	0.763	0.789	0.775	0.88	0.88913				1.78056	1.79796
	0.658	0.832	0.939	0.933	0.822	0.763	0.792	0.775	0.881	0.89114				1.78194	1.80272
	0.659	0.837	0.939	0.934	0.823	0.764	0.792	0.776	0.881	0.89114				1.79792	1.8415
	0.66	0.838	0.94	0.936	0.823	0.765	0.793	0.776	0.883	0.89208				1.80208	1.85646
	0.661	0.841	0.94	0.936	0.825	0.765	0.793	0.777	0.883	0.89432				1.81875	1.85714
	0.661	0.842	0.942	0.939	0.826	0.766	0.793	0.777	0.885	0.89462				1.82292	1.88367
	0.664	0.843	0.942	0.94	0.828	0.766	0.793	0.777	0.887	0.89462				1.84236	1.88639
	0.664	0.845	0.943	0.943	0.828	0.766	0.794	0.777	0.887	0.89476				1.85972	1.9
	0.665	0.845	0.945	0.944	0.829	0.767	0.794	0.778	0.888	0.89562				1.94653	2.02789
	0.666	0.848	0.946	0.946	0.829	0.768	0.794	0.778	0.888	0.89589
	0.667	0.853	0.947	0.947	0.829	0.768	0.795	0.778	0.89	0.89589
	0.668	0.861	0.947	0.953	0.83	0.768	0.797	0.779	0.89	0.89717
	0.669	0.863	0.948	0.954	0.83	0.77	0.797	0.78	0.89	0.89822
	0.671	0.865	0.951	0.955	0.833	0.772	0.797	0.78	0.89	0.89838
	0.671	0.868	0.951	0.955	0.834	0.772	0.798	0.781	0.891	0.89951
	0.671	0.874	0.951	0.959	0.837	0.772	0.8	0.782	0.891	0.89951
	0.672	0.887	0.952	0.96	0.837	0.772	0.8	0.782	0.893	0.89959
	0.673	0.897	0.953	0.961	0.838	0.773	0.801	0.783	0.894	0.89969
	0.675	0.898	0.954	0.963	0.838	0.775	0.801	0.783	0.894	0.89969
	0.675	0.906	0.954	0.965	0.842	0.775	0.802	0.783	0.894	0.90321
	0.676	0.911	0.955	0.965	0.842	0.775	0.802	0.785	0.895	0.90321
	0.676	0.912	0.956	0.967	0.843	0.776	0.803	0.785	0.896	0.90471
	0.678	0.914	0.956	0.967	0.843	0.778	0.803	0.786	0.896	0.906
	0.678	0.917	0.957	0.967	0.843	0.778	0.804	0.787	0.897	0.906
	0.679	0.918	0.96	0.968	0.844	0.778	0.805	0.787	0.898	0.906
	0.679	0.939	0.961	0.97	0.844	0.779	0.805	0.787	0.899	0.906
	0.679	0.947	0.961	0.97	0.845	0.779	0.807	0.787	0.9	0.90604
	0.68	0.956	0.964	0.97	0.845	0.779	0.807	0.788	0.9	0.91046
	0.68	0.959	0.964	0.972	0.847	0.78	0.808	0.789	0.9	0.91287
	0.681	0.961	0.966	0.972	0.848	0.78	0.808	0.789	0.9	0.91365
	0.682	0.968	0.967	0.972	0.849	0.78	0.809	0.79	0.901	0.91492
	0.682	0.976	0.972	0.974	0.849	0.78	0.809	0.79	0.901	0.9177
	0.683	0.977	0.974	0.974	0.851	0.78	0.81	0.791	0.902	0.91891
	0.683	0.979	0.974	0.975	0.852	0.78	0.811	0.793	0.902	0.92253
	0.684	0.991	0.976	0.976	0.852	0.781	0.811	0.794	0.905	0.92288
	0.686	1.009	0.979	0.976	0.853	0.781	0.812	0.794	0.905	0.9238
	0.686	1.009	0.979	0.976	0.854	0.782	0.812	0.795	0.906	0.925
	0.687	1.01	0.981	0.978	0.858	0.782	0.814	0.796	0.907	0.92507
	0.691	1.037	0.983	0.979	0.862	0.783	0.815	0.796	0.909	0.92615
	0.692	1.043	0.983	0.981	0.862	0.784	0.815	0.798	0.909	0.92634
	0.694	1.074	0.984	0.982	0.862	0.784	0.816	0.798	0.909	0.92677
	0.695	1.095	0.984	0.984	0.864	0.784	0.817	0.798	0.909	0.92736
	0.695		0.986	0.985	0.866	0.785	0.818	0.798	0.911	0.92857
	0.696		0.987	0.987	0.866	0.786	0.82	0.799	0.912	0.92888
	0.696		0.988	0.988	0.867	0.786	0.82	0.8	0.912	0.93098
	0.698		0.989	0.988	0.868	0.787	0.821	0.8	0.915	0.931
	0.698		0.989	0.988	0.87	0.787	0.821	0.801	0.917	0.932
	0.698		0.99	0.991	0.87	0.787	0.823	0.803	0.917	0.932
	0.698		0.991	0.992	0.872	0.787	0.824	0.803	0.918	0.93326
	0.698		0.993	0.992	0.873	0.789	0.824	0.804	0.918	0.93395
	0.699		0.995	0.993	0.873	0.79	0.827	0.806	0.918	0.93456
	0.702		0.995	0.994	0.875	0.791	0.827	0.807	0.921	0.93581
	0.703		0.995	0.994	0.875	0.791	0.827	0.81	0.922	0.93702
	0.705		0.996	0.994	0.875	0.792	0.828	0.81	0.922	0.93944
	0.708		0.997	0.995	0.876	0.792	0.831	0.811	0.923	0.941
	0.709		0.997	0.995	0.878	0.793	0.831	0.811	0.926	0.94105
	0.71		0.999	0.996	0.878	0.795	0.832	0.812	0.926	0.94157
	0.711		1.001	0.997	0.879	0.797	0.832	0.812	0.928	0.94235
	0.713		1.003	0.998	0.88	0.797	0.833	0.812	0.929	0.94284
	0.713		1.004	1.002	0.88	0.797	0.833	0.812	0.929	0.94427
	0.714		1.005	1.004	0.88	0.797	0.834	0.812	0.93	0.94547
	0.714		1.005	1.007	0.88	0.798	0.835	0.812	0.932	0.94624
	0.714		1.007	1.007	0.88	0.8	0.835	0.812	0.933	0.94884
	0.714		1.007	1.009	0.883	0.801	0.836	0.812	0.937	0.9491
	0.715		1.009	1.01	0.887	0.802	0.837	0.813	0.938	0.94918
	0.715		1.009	1.011	0.888	0.802	0.838	0.814	0.938	0.95151
	0.715		1.009	1.012	0.888	0.803	0.839	0.815	0.941	0.95272
	0.718		1.013	1.013	0.888	0.803	0.839	0.815	0.941	0.95273
	0.718		1.013	1.014	0.889	0.804	0.84	0.815	0.941	0.95273
	0.718		1.013	1.018	0.891	0.804	0.84	0.815	0.942	0.953
	0.719		1.015	1.02	0.892	0.805	0.841	0.815	0.943	0.953
	0.72		1.015	1.021	0.892	0.806	0.842	0.817	0.943	0.954
	0.72		1.017	1.022	0.892	0.806	0.844	0.817	0.943	0.954
	0.72		1.017	1.023	0.893	0.807	0.845	0.817	0.947	0.955
	0.72		1.018	1.025	0.893	0.807	0.845	0.818	0.947	0.955
	0.721		1.02	1.027	0.898	0.807	0.845	0.818	0.947	0.956
	0.722		1.021	1.028	0.899	0.807	0.845	0.818	0.948	0.95634
	0.722		1.021	1.028	0.903	0.808	0.847	0.819	0.949	0.95634
	0.723		1.022	1.028	0.905	0.808	0.847	0.819	0.949	0.95663
	0.724		1.023	1.034	0.906	0.808	0.847	0.819	0.95	0.9568
	0.725		1.027	1.036	0.906	0.809	0.85	0.82	0.953	0.95792
	0.725		1.028	1.038	0.907	0.809	0.85	0.82	0.963	0.95922
	0.728		1.03	1.038	0.907	0.809	0.85	0.82	0.963	0.96
	0.73		1.03	1.038	0.908	0.81	0.85	0.82	0.965	0.96182
	0.73		1.031	1.038	0.908	0.811	0.851	0.825	0.965	0.96238
	0.731		1.034	1.04	0.91	0.813	0.851	0.826	0.97	0.96441
	0.732		1.035	1.041	0.91	0.815	0.851	0.827	0.97	0.966
	0.732		1.035	1.043	0.911	0.816	0.856	0.828	0.97	0.966
	0.733		1.037	1.043	0.913	0.817	0.857	0.829	0.97	0.966
	0.736		1.038	1.045	0.914	0.818	0.858	0.829	0.971	0.96822
	0.736		1.038	1.047	0.915	0.818	0.858	0.829	0.971	0.97083
	0.737		1.038	1.047	0.916	0.819	0.859	0.83	0.973	0.9709
	0.737		1.039	1.049	0.916	0.819	0.861	0.83	0.974	0.97204
	0.737		1.04	1.052	0.917	0.819	0.862	0.831	0.974	0.973
	0.737		1.04	1.052	0.917	0.819	0.863	0.832	0.976	0.973
	0.738		1.041	1.053	0.917	0.82	0.864	0.833	0.976	0.97329
	0.739		1.044	1.053	0.919	0.82	0.865	0.834	0.978	0.97445
	0.74		1.044	1.061	0.92	0.82	0.865	0.834	0.978	0.9761
	0.741		1.047	1.062	0.921	0.823	0.866	0.834	0.981	0.97687
	0.742		1.048	1.065	0.922	0.824	0.868	0.835	0.981	0.97687
	0.743		1.055	1.066	0.924	0.825	0.869	0.837	0.982	0.9771
	0.743		1.057	1.067	0.928	0.826	0.871	0.838	0.982	0.97837
	0.743		1.058	1.068	0.932	0.828	0.872	0.838	0.982	0.97964
	0.745		1.064	1.07	0.934	0.828	0.872	0.838	0.983	0.98218
	0.747		1.064	1.071	0.936	0.828	0.873	0.841	0.984	0.98532
	0.75		1.066	1.071	0.937	0.828	0.873	0.841	0.984	0.98653
	0.75		1.066	1.072	0.938	0.83	0.874	0.841	0.984	0.98653
	0.751		1.066	1.073	0.94	0.83	0.875	0.843	0.985	0.987
	0.755		1.066	1.074	0.94	0.831	0.876	0.843	0.986	0.987
	0.756		1.067	1.075	0.94	0.831	0.876	0.844	0.989	0.99037
	0.757		1.068	1.076	0.941	0.831	0.876	0.844	0.992	0.99257
	0.759		1.068	1.078	0.941	0.832	0.877	0.845	0.992	0.99297
	0.759		1.069	1.08	0.942	0.832	0.877	0.845	0.993	0.99427
	0.761		1.069	1.084	0.943	0.833	0.878	0.845	0.994	0.99498
	0.761		1.07	1.086	0.943	0.833	0.88	0.845	0.998	0.99686
	0.763		1.07	1.086	0.945	0.833	0.881	0.845	0.998	0.9974
	0.763		1.072	1.089	0.946	0.834	0.882	0.847	1.001	0.99994
	0.765		1.072	1.093	0.946	0.835	0.882	0.848	1.001	1.00076
	0.766		1.074	1.099	0.946	0.835	0.882	0.85	1.001	1.00502
	0.767		1.076	1.103	0.946	0.836	0.883	0.85	1.002	1.00585
	0.768		1.078	1.103	0.947	0.836	0.884	0.85	1.004	1.00629
	0.769		1.08	1.106	0.947	0.836	0.884	0.85	1.004	1.00706
	0.769		1.08	1.107	0.948	0.837	0.885	0.851	1.006	1.00984
	0.77		1.081	1.109	0.95	0.837	0.887	0.852	1.006	1.01263
	0.77		1.083	1.115	0.952	0.838	0.888	0.852	1.006	1.01263
	0.771		1.083	1.117	0.952	0.838	0.889	0.852	1.007	1.01517
	0.771		1.083	1.119	0.953	0.839	0.891	0.852	1.007	1.01551
	0.772		1.083	1.12	0.954	0.84	0.891	0.854	1.009	1.01551
	0.772		1.084	1.121	0.956	0.84	0.891	0.854	1.009	1.01644
	0.774		1.086	1.121	0.958	0.84	0.891	0.855	1.009	1.01771
	0.78		1.088	1.128	0.958	0.841	0.892	0.856	1.009	1.01897
	0.783		1.089	1.128	0.961	0.841	0.892	0.858	1.016	1.02023
	0.783		1.09	1.128	0.964	0.842	0.893	0.858	1.019	1.02151
	0.784		1.091	1.13	0.966	0.842	0.893	0.859	1.019	1.02396
	0.787		1.093	1.131	0.972	0.843	0.893	0.859	1.02	1.02405
	0.789		1.095	1.132	0.974	0.843	0.896	0.86	1.022	1.02412
	0.79		1.095	1.132	0.975	0.844	0.896	0.86	1.026	1.02758
	0.791		1.096	1.133	0.977	0.844	0.896	0.861	1.026	1.036
	0.792		1.098	1.14	0.978	0.844	0.898	0.861	1.026	1.03674
	0.793		1.099	1.143	0.978	0.845	0.898	0.861	1.029	1.03724
	0.793		1.105	1.143	0.979	0.845	0.9	0.864	1.031	1.03724
	0.793		1.105	1.146	0.98	0.845	0.901	0.865	1.033	1.03801
	0.794		1.106	1.148	0.983	0.845	0.904	0.865	1.033	1.03966
	0.795		1.112	1.151	0.985	0.846	0.904	0.865	1.036	1.04087
	0.797		1.115	1.155	0.986	0.846	0.909	0.866	1.037	1.042
	0.797		1.115	1.155	0.986	0.847	0.909	0.867	1.038	1.043
	0.799		1.116	1.156	0.996	0.848	0.91	0.868	1.041	1.04359
	0.801		1.117	1.158	0.997	0.849	0.91	0.868	1.041	1.04449
	0.804		1.117	1.16	1.003	0.85	0.911	0.869	1.041	1.04943
	0.807		1.117	1.161	1.004	0.85	0.912	0.869	1.044	1.0507
	0.808		1.122	1.163	1.005	0.85	0.914	0.869	1.046	1.05197
	0.808		1.125	1.166	1.005	0.85	0.914	0.872	1.046	1.056
	0.81		1.13	1.169	1.014	0.851	0.917	0.873	1.047	1.056
	0.812		1.132	1.17	1.014	0.854	0.917	0.877	1.047	1.056
	0.813		1.134	1.172	1.014	0.854	0.918	0.877	1.049	1.05704
	0.815		1.135	1.173	1.022	0.855	0.92	0.877	1.049	1.05958
	0.816		1.135	1.178	1.024	0.856	0.923	0.877	1.049	1.06743
	0.816		1.14	1.178	1.026	0.856	0.923	0.879	1.049	1.07215
	0.819		1.143	1.179	1.029	0.857	0.923	0.88	1.049	1.07734
	0.819		1.144	1.183	1.031	0.858	0.928	0.882	1.049	1.07994
	0.819		1.145	1.184	1.032	0.858	0.93	0.884	1.05	1.08
	0.821		1.146	1.185	1.036	0.858	0.932	0.884	1.05	1.08
	0.823		1.146	1.186	1.036	0.858	0.933	0.886	1.051	1.09
	0.823		1.146	1.189	1.041	0.858	0.934	0.886	1.054	1.092
	0.824		1.147	1.19	1.042	0.858	0.934	0.887	1.059	1.092
	0.826		1.147	1.204	1.05	0.858	0.935	0.887	1.06	1.093
	0.826		1.152	1.207	1.052	0.859	0.937	0.888	1.06	1.093
	0.829		1.156	1.211	1.054	0.859	0.938	0.89	1.06	1.094
	0.831		1.159	1.218	1.066	0.859	0.94	0.891	1.06	1.094
	0.831		1.16	1.223	1.075	0.861	0.942	0.892	1.063	1.09811
	0.832		1.163	1.223	1.082	0.861	0.943	0.894	1.066	1.102
	0.832		1.167	1.224	1.082	0.861	0.943	0.894	1.067	1.1046
	0.834		1.169	1.227	1.084	0.863	0.944	0.896	1.068	1.10849
	0.838		1.169	1.23	1.084	0.863	0.944	0.896	1.072	1.112
	0.839		1.172	1.237	1.092	0.865	0.944	0.897	1.079	1.114
	0.839		1.173	1.243	1.094	0.865	0.947	0.898	1.082	1.11694
	0.842		1.187	1.251	1.095	0.866	0.948	0.9	1.082	1.123
	0.843		1.191	1.267	1.098	0.867	0.949	0.9	1.086	1.12796
	0.845		1.194	1.269	1.101	0.868	0.949	0.9	1.092	1.13318
	0.845		1.198	1.27	1.105	0.868	0.95	0.901	1.092	1.13505
	0.849		1.204	1.274	1.111	0.868	0.95	0.902	1.098	1.145
	0.854		1.206	1.275	1.121	0.868	0.953	0.905	1.107	1.145
	0.868		1.209	1.282	1.136	0.869	0.953	0.906	1.108	1.149
	0.869		1.209	1.284	1.146	0.869	0.955	0.907	1.108	1.15522
	0.874		1.211	1.294	1.155	0.87	0.955	0.912	1.108	1.159
	0.875		1.217	1.294	1.168	0.87	0.956	0.913	1.112	1.164
	0.877		1.22	1.298	1.175	0.872	0.956	0.913	1.113	1.164
	0.887		1.238	1.307	1.177	0.872	0.96	0.916	1.117	1.16645
	0.888		1.238	1.313	1.223	0.873	0.96	0.916	1.117	1.16998
	0.89		1.242	1.315		0.873	0.961	0.916	1.117	1.17858
	0.896		1.251	1.32		0.874	0.963	0.917	1.133	1.18939
	0.898		1.262	1.334		0.875	0.964	0.917	1.141	1.19282
	0.898		1.262	1.354		0.877	0.965	0.918	1.142	1.198
	0.898		1.284	1.391		0.877	0.967	0.918	1.142	1.198
	0.9		1.286	1.407		0.877	0.967	0.92	1.16	1.209
	0.911		1.294	1.418		0.878	0.969	0.921	1.16	1.25646
	0.913		1.296	1.422		0.879	0.969	0.923	1.161	1.2715
	0.92		1.3			0.879	0.971	0.925	1.161	1.323
	0.925		1.307			0.88	0.971	0.927	1.163	1.329
	0.928		1.317			0.88	0.972	0.929	1.163	1.32915
	0.933		1.322			0.88	0.972	0.934	1.167	1.339
	0.936		1.327			0.88	0.975	0.935	1.168	1.36327
	0.943		1.327			0.881	0.976	0.936	1.168	1.41612
	0.947		1.344			0.881	0.976	0.937	1.185
	0.977		1.346			0.881	0.977	0.937	1.195
	0.997		1.351			0.881	0.978	0.938	1.204
	1.004		1.355			0.881	0.978	0.94	1.212
			1.363			0.882	0.978	0.94	1.219
			1.375			0.883	0.979	0.943	1.219
			1.389			0.883	0.979	0.944	1.243
			1.396			0.884	0.982	0.946	1.243
			1.403			0.884	0.982	0.948	1.246
			1.404			0.884	0.982	0.948	1.268
			1.434			0.885	0.985	0.952	1.282
			1.437			0.885	0.987	0.952	1.299
			1.451			0.885	0.988	0.953	1.299
						0.885	0.988	0.954	1.312
						0.886	0.989	0.962	1.319
						0.886	0.989	0.964	1.332
						0.886	0.991	0.966	1.332
						0.886	0.994	0.971	1.349
						0.887	0.996	0.972	1.356
						0.888	1.001	0.974	1.356
						0.889	1.001	0.979	1.36
						0.889	1.002	0.98	1.392
						0.892	1.003	0.982	1.401
						0.892	1.003	0.983
						0.893	1.006	0.984
						0.894	1.007	0.984
						0.894	1.008	0.988
						0.895	1.011	0.989
						0.895	1.011	0.991
						0.896	1.012	0.992
						0.896	1.013	0.994
						0.897	1.014	0.995
						0.897	1.016	1.006
						0.899	1.017	1.018
						0.899	1.019	1.019
						0.9	1.02	1.057
						0.902	1.021	1.061
						0.903	1.022	1.062
						0.904	1.023	1.069
						0.906	1.024
						0.907	1.033
						0.908	1.033
						0.909	1.036
						0.909	1.037
						0.91	1.038
						0.911	1.039
						0.913	1.039
						0.914	1.04
						0.914	1.041
						0.914	1.049
						0.915	1.049
						0.918	1.054
						0.918	1.055
						0.918	1.067
						0.919	1.067
						0.92	1.068
						0.921	1.069
						0.922	1.07
						0.924	1.073
						0.924	1.078
						0.925	1.079
						0.926	1.082
						0.927	1.087
						0.927	1.09
						0.927	1.096
						0.929	1.098
						0.931	1.099
						0.931	1.11
						0.932	1.124
						0.933	1.127
						0.934	1.13
						0.936	1.133
						0.937	1.138
						0.937	1.146
						0.942	1.147
						0.942	1.155
						0.943	1.166
						0.946	1.173
						0.948	1.183
						0.949	1.185
						0.95
						0.95
						0.952
						0.952
						0.953
						0.953
						0.957
						0.958
						0.958
						0.961
						0.962
						0.965
						0.965
						0.966
						0.968
						0.969
						0.969
						0.97
						0.971
						0.971
						0.973
						0.973
						0.974
						0.974
						0.976
						0.979
						0.981
						0.983
						0.983
						0.985
						0.986
						0.988
						0.992
						0.993
						0.995
						0.996
						0.999
						1.003
						1.007
						1.008
						1.01
						1.015
						1.015
						1.017
						1.02
						1.022
						1.026
						1.03
						1.04
						1.043
						1.05
						1.058
						1.065
						1.073
						1.077
						1.078
						1.079
						1.099
						1.099
