# Supplementary material for: Local chromatin fiber folding represses transcription and loop extrusion in quiescent cells
Source: eLife. 2021 Nov 4;10:e72062. doi: 10.7554/eLife.72062 (PMC8598167; doi:10.7554/eLife.72062)
Supplement: Figure 5—source data 1. [file elife-72062-fig5-data1.xlsx]

## Sheet: DAPI Volume
DAPI volume measurements
Strain:	7175	7208	7175 + Phe	7208 + Phe
	0.503	0.528	0.531293	0.497959
	0.557	0.534	0.542177	0.507483
	0.583	0.563	0.582993	0.518367
	0.602	0.572	0.62449	0.527211
	0.63	0.589	0.627891	0.529932
	0.637	0.591	0.65034	0.544218
	0.652	0.603	0.669388	0.57619
	0.66	0.609	0.678912	0.576871
	0.671	0.62	0.695918	0.593197
	0.674	0.637	0.710204	0.612245
	0.682	0.65	0.72585	0.646939
	0.685	0.666	0.733333	0.660544
	0.686	0.667	0.742857	0.661905
	0.691	0.671	0.743537	0.664626
	0.692	0.675	0.746939	0.665986
	0.696	0.676	0.75034	0.670068
	0.698	0.681	0.75034	0.680952
	0.7	0.687	0.756463	0.682313
	0.706	0.688	0.757823	0.687075
	0.708	0.689	0.770068	0.689116
	0.713	0.69	0.77415	0.690476
	0.717	0.691	0.783673	0.694558
	0.722	0.709	0.785034	0.7
	0.726	0.712	0.788435	0.7
	0.727	0.713	0.788435	0.705442
	0.728	0.713	0.789116	0.714966
	0.729	0.718	0.790476	0.715646
	0.73	0.723	0.794558	0.716327
	0.73	0.73	0.79932	0.717007
	0.734	0.733	0.80068	0.723129
	0.739	0.733	0.804082	0.734014
	0.741	0.735	0.804762	0.738095
	0.743	0.74	0.804762	0.756463
	0.747	0.741	0.805442	0.757143
	0.748	0.742	0.807483	0.761905
	0.748	0.747	0.808844	0.762585
	0.754	0.747	0.810204	0.77551
	0.755	0.755	0.812245	0.777551
	0.759	0.756	0.816327	0.780952
	0.759	0.757	0.816327	0.780952
	0.764	0.758	0.820408	0.793878
	0.766	0.759	0.822449	0.805442
	0.766	0.759	0.823129	0.805442
	0.769	0.761	0.827891	0.808844
	0.77	0.761	0.829252	0.813605
	0.772	0.762	0.829932	0.820408
	0.774	0.765	0.831973	0.822449
	0.776	0.769	0.831973	0.82381
	0.776	0.772	0.833333	0.82449
	0.777	0.773	0.840816	0.82517
	0.779	0.778	0.842857	0.828571
	0.779	0.783	0.844218	0.829932
	0.786	0.785	0.844218	0.829932
	0.787	0.792	0.844218	0.833333
	0.787	0.794	0.844898	0.834014
	0.787	0.796	0.846259	0.836735
	0.789	0.801	0.84966	0.845578
	0.79	0.803	0.85034	0.848299
	0.794	0.805	0.85034	0.85034
	0.796	0.809	0.85102	0.855102
	0.797	0.809	0.852381	0.856463
	0.797	0.812	0.853061	0.859184
	0.797	0.814	0.855102	0.872109
	0.798	0.815	0.855782	0.872789
	0.798	0.815	0.860544	0.87415
	0.799	0.816	0.861224	0.878231
	0.8	0.818	0.861905	0.878912
	0.805	0.819	0.863946	0.879592
	0.805	0.819	0.865986	0.883673
	0.808	0.819	0.87619	0.884354
	0.809	0.82	0.878912	0.891837
	0.814	0.822	0.879592	0.90068
	0.817	0.825	0.880272	0.901361
	0.819	0.825	0.882313	0.904082
	0.82	0.827	0.884354	0.918367
	0.821	0.827	0.885034	0.919048
	0.821	0.828	0.885714	0.921088
	0.823	0.831	0.887075	0.926531
	0.825	0.832	0.887075	0.927891
	0.83	0.832	0.889796	0.927891
	0.831	0.833	0.893197	0.934694
	0.831	0.833	0.898639	0.936054
	0.831	0.834	0.901361	0.946259
	0.832	0.835	0.904082	0.947619
	0.833	0.838	0.908163	0.953742
	0.834	0.838	0.910204	0.957143
	0.835	0.842	0.914286	0.960544
	0.835	0.842	0.916327	0.982313
	0.836	0.842	0.917007	0.985034
	0.837	0.843	0.919728	0.987075
	0.837	0.846	0.921088	0.988435
	0.838	0.85	0.922449	0.989796
	0.838	0.853	0.92449	0.992517
	0.839	0.854	0.929932	0.995918
	0.839	0.856	0.930612	1.0034
	0.841	0.859	0.931973	1.0068
	0.841	0.859	0.933333	1.00884
	0.843	0.86	0.934014	1.01701
	0.844	0.861	0.936054	1.02109
	0.845	0.863	0.936735	1.02177
	0.847	0.863	0.941497	1.02721
	0.85	0.865	0.942177	1.03061
	0.851	0.865	0.943537	1.03469
	0.855	0.866	0.943537	1.04898
	0.86	0.87	0.943537	1.05034
	0.86	0.87	0.944218	1.05238
	0.863	0.871	0.944218	1.05578
	0.863	0.874	0.945578	1.06327
	0.865	0.874	0.95102	1.06735
	0.866	0.876	0.957823	1.06735
	0.867	0.876	0.964626	1.07007
	0.868	0.88	0.965306	1.07007
	0.871	0.88	0.965986	1.07415
	0.872	0.88	0.967347	1.07687
	0.876	0.881	0.971429	1.08367
	0.878	0.884	0.973469	1.08503
	0.878	0.884	0.97551	1.08571
	0.879	0.885	0.979592	1.08844
	0.879	0.885	0.981633	1.09184
	0.879	0.886	0.983673	1.09252
	0.882	0.886	0.983673	1.09252
	0.884	0.886	0.988435	1.09524
	0.885	0.887	0.989796	1.0966
	0.888	0.887	0.995238	1.09864
	0.89	0.888	0.99932	1.1068
	0.89	0.888	1.00068	1.10748
	0.891	0.889	1.00272	1.10748
	0.895	0.889	1.00408	1.10748
	0.897	0.89	1.00476	1.11293
	0.897	0.89	1.00476	1.11361
	0.897	0.891	1.00748	1.12041
	0.899	0.891	1.01565	1.12177
	0.899	0.893	1.01701	1.12789
	0.901	0.894	1.02313	1.12857
	0.902	0.898	1.02449	1.14082
	0.902	0.898	1.02517	1.14286
	0.904	0.898	1.02585	1.14762
	0.904	0.899	1.02925	1.14898
	0.905	0.9	1.03129	1.1619
	0.905	0.905	1.03197	1.17551
	0.906	0.907	1.03265	1.19048
	0.906	0.912	1.03401	1.19388
	0.909	0.913	1.03605	1.20068
	0.912	0.913	1.03605	1.21156
	0.914	0.914	1.03741	1.21361
	0.915	0.915	1.03878	1.21633
	0.917	0.915	1.04082	1.22177
	0.917	0.917	1.04082	1.22245
	0.918	0.917	1.04286	1.23265
	0.918	0.917	1.04422	1.24694
	0.918	0.918	1.04626	1.26871
	0.919	0.918	1.04694	1.27959
	0.919	0.92	1.05306	1.3034
	0.921	0.92	1.05442	1.31429
	0.922	0.92	1.0551	1.32789
	0.924	0.921	1.0585	1.32993
	0.925	0.921	1.05918	1.33673
	0.926	0.921	1.05918	1.35782
	0.927	0.922	1.06054	1.36259
	0.929	0.923	1.0619	1.42245
	0.93	0.924	1.06395	1.46599
	0.934	0.925	1.06463	1.48095
	0.934	0.926	1.07075	1.52789
	0.934	0.926	1.07075	1.55782
	0.935	0.929	1.07211
	0.936	0.929	1.07279
	0.938	0.929	1.07483
	0.938	0.93	1.07483
	0.939	0.932	1.07551
	0.939	0.933	1.07823
	0.939	0.934	1.08095
	0.94	0.936	1.09796
	0.94	0.936	1.09864
	0.942	0.939	1.10204
	0.942	0.94	1.11429
	0.943	0.943	1.12313
	0.945	0.944	1.13401
	0.946	0.946	1.14558
	0.947	0.947	1.15442
	0.947	0.953	1.1551
	0.948	0.954	1.15986
	0.951	0.955	1.16463
	0.951	0.955	1.16939
	0.951	0.959	1.17007
	0.952	0.96	1.17007
	0.953	0.961	1.17755
	0.954	0.963	1.17959
	0.954	0.965	1.18231
	0.955	0.965	1.1898
	0.956	0.967	1.19524
	0.956	0.967	1.19592
	0.957	0.967	1.20408
	0.96	0.968	1.20544
	0.961	0.97	1.21088
	0.961	0.97	1.21088
	0.964	0.97	1.21156
	0.964	0.972	1.21224
	0.966	0.972	1.21837
	0.967	0.972	1.22449
	0.972	0.974	1.22789
	0.974	0.974	1.22925
	0.974	0.975	1.24286
	0.976	0.976	1.25578
	0.979	0.976	1.27143
	0.979	0.976	1.27687
	0.981	0.978	1.28435
	0.983	0.979	1.29116
	0.983	0.981	1.3102
	0.984	0.982	1.32857
	0.984	0.984	1.33061
	0.986	0.985	1.34014
	0.987	0.987	1.35238
	0.988	0.988	1.35578
	0.989	0.988
	0.989	0.988
	0.99	0.991
	0.991	0.992
	0.993	0.992
	0.995	0.993
	0.995	0.994
	0.995	0.994
	0.996	0.994
	0.997	0.995
	0.997	0.995
	0.999	0.996
	1.001	0.997
	1.003	0.998
	1.004	1.002
	1.005	1.004
	1.005	1.007
	1.007	1.007
	1.007	1.009
	1.009	1.01
	1.009	1.011
	1.009	1.012
	1.013	1.013
	1.013	1.014
	1.013	1.018
	1.015	1.02
	1.015	1.021
	1.017	1.022
	1.017	1.023
	1.018	1.025
	1.02	1.027
	1.021	1.028
	1.021	1.028
	1.022	1.028
	1.023	1.034
	1.027	1.036
	1.028	1.038
	1.03	1.038
	1.03	1.038
	1.031	1.038
	1.034	1.04
	1.035	1.041
	1.035	1.043
	1.037	1.043
	1.038	1.045
	1.038	1.047
	1.038	1.047
	1.039	1.049
	1.04	1.052
	1.04	1.052
	1.041	1.053
	1.044	1.053
	1.044	1.061
	1.047	1.062
	1.048	1.065
	1.055	1.066
	1.057	1.067
	1.058	1.068
	1.064	1.07
	1.064	1.071
	1.066	1.071
	1.066	1.072
	1.066	1.073
	1.066	1.074
	1.067	1.075
	1.068	1.076
	1.068	1.078
	1.069	1.08
	1.069	1.084
	1.07	1.086
	1.07	1.086
	1.072	1.089
	1.072	1.093
	1.074	1.099
	1.076	1.103
	1.078	1.103
	1.08	1.106
	1.08	1.107
	1.081	1.109
	1.083	1.115
	1.083	1.117
	1.083	1.119
	1.083	1.12
	1.084	1.121
	1.086	1.121
	1.088	1.128
	1.089	1.128
	1.09	1.128
	1.091	1.13
	1.093	1.131
	1.095	1.132
	1.095	1.132
	1.096	1.133
	1.098	1.14
	1.099	1.143
	1.105	1.143
	1.105	1.146
	1.106	1.148
	1.112	1.151
	1.115	1.155
	1.115	1.155
	1.116	1.156
	1.117	1.158
	1.117	1.16
	1.117	1.161
	1.122	1.163
	1.125	1.166
	1.13	1.169
	1.132	1.17
	1.134	1.172
	1.135	1.173
	1.135	1.178
	1.14	1.178
	1.143	1.179
	1.144	1.183
	1.145	1.184
	1.146	1.185
	1.146	1.186
	1.146	1.189
	1.147	1.19
	1.147	1.204
	1.152	1.207
	1.156	1.211
	1.159	1.218
	1.16	1.223
	1.163	1.223
	1.167	1.224
	1.169	1.227
	1.169	1.23
	1.172	1.237
	1.173	1.243
	1.187	1.251
	1.191	1.267
	1.194	1.269
	1.198	1.27
	1.204	1.274
	1.206	1.275
	1.209	1.282
	1.209	1.284
	1.211	1.294
	1.217	1.294
	1.22	1.298
	1.238	1.307
	1.238	1.313
	1.242	1.315
	1.251	1.32
	1.262	1.334
	1.262	1.354
	1.284	1.391
	1.286	1.407
	1.294	1.418
	1.296	1.422
	1.3
	1.307
	1.317
	1.322
	1.327
	1.327
	1.344
	1.346
	1.351
	1.355
	1.363
	1.375
	1.389
	1.396
	1.403
	1.404
	1.434
	1.437
	1.451
