# Supplementary material for: Local chromatin fiber folding represses transcription and loop extrusion in quiescent cells
Source: eLife journal article supplement (doi:10.7554/elife.72062), 2021-11-04

**Figure 3-supplement 1 Western blot source data**

Relevant lanes are marked with brackets and bands are marked with an arrow.

**H4Ac** [ ]

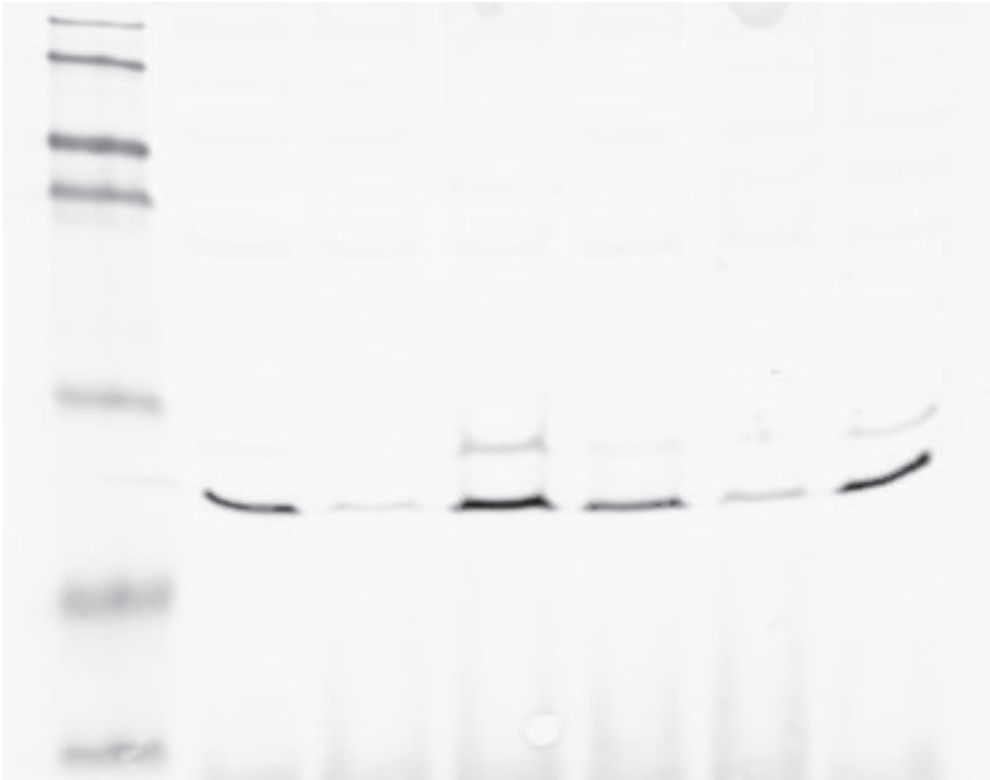

**H2B** [ ]

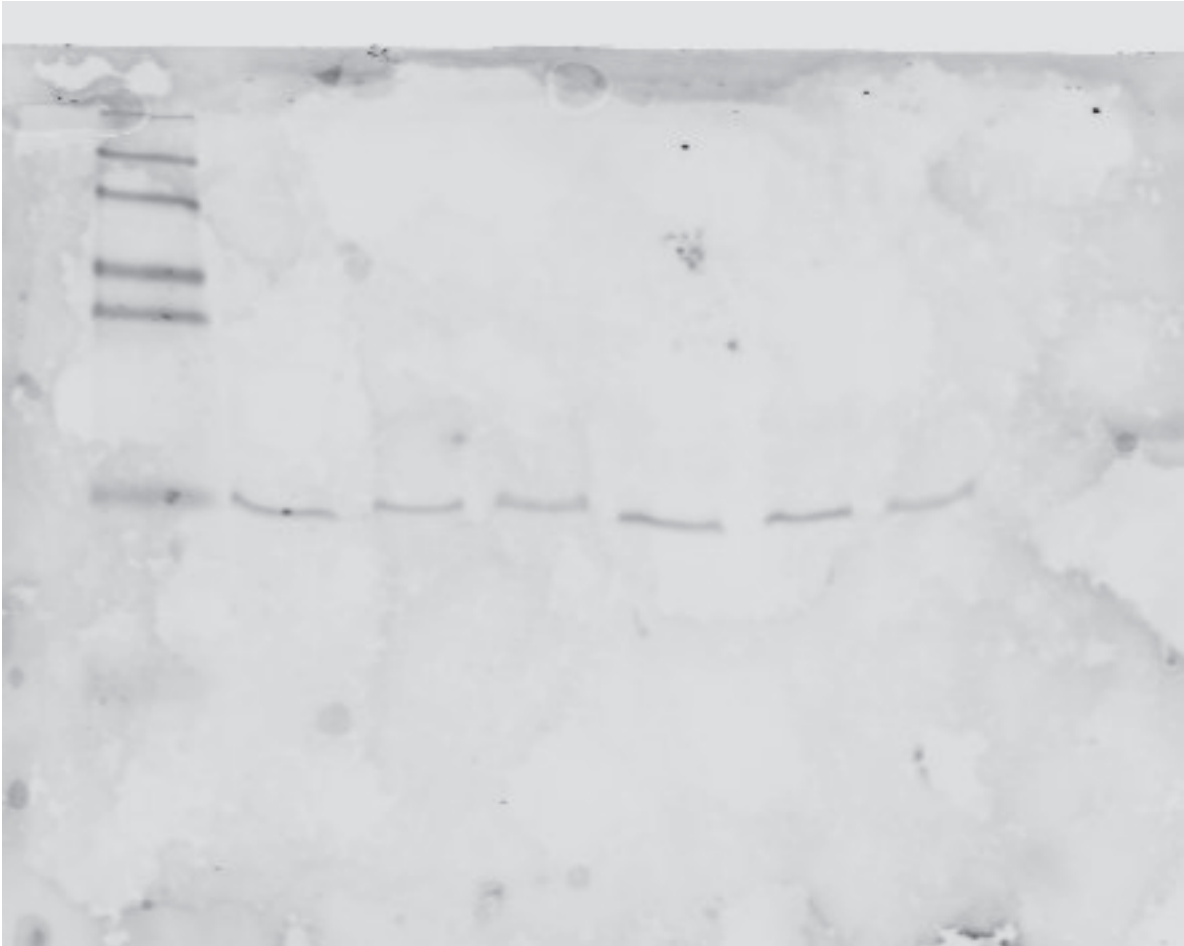

Supplement: supp [file elife-72062-supp-v1.zip]
